# Supplementary material
Source: PubMed Central journal article supplement (PMC8114133)
Supplement: jama-e214956-s001.pdf [file jama-e214956-s001.pdf]

1

**Supplemental Appendix 1**

2

**Protocol and Protocol Amendments**

3 **Study Protocol**

4

5

6

7

8

***Study of Clinical Efficacy of Antimicrobial Therapy Strategy Using Pragmatic***

9

***Design in Idiopathic Pulmonary Fibrosis***

10

***(CleanUP-IPF)***

11

12

13

**Protocol Amendment 2**

14

15

Protocol Version Date: March 2, 2018

16

ClinicalTrials.gov ID: NCT02759120

17

18 **TABLE OF CONTENTS**

19 **1. EXECUTIVE SUMMARY ..... 5**

20 **2. HYPOTHESES AND OBJECTIVES..... 9**

21 2.1 Primary Objective and Hypothesis..... 9

22 2.2 Secondary Objectives ..... 9

23 **3. BACKGROUND AND RATIONALE..... 10**

24 **4. STUDY POPULATION AND ELIGIBILITY CRITERIA ..... 11**

25 4.1 Inclusion Criteria..... 11

26 4.2 Exclusion Criteria ..... 11

27 **5. TREATMENT INTERVENTIONS..... 12**

28 5.1 Randomization ..... 13

29 5.2 Blinding..... 13

30 5.3 Patient Safety and Concomitant Therapies ..... 13

31 **6. RECRUITMENT AND SCREENING PROCEDURES..... 14**

32 6.1 Common Recruitment/Screening Procedures ..... 14

33 6.2 Estimated Enrollment Period..... 14

34 **7. SCREENING EVALUATIONS AND RANDOMIZATION..... 14**

35 7.1 Screening ..... 14

36 7.2 Screening Assessments..... 14

37 7.3 Randomization ..... 16

38 **8. FOLLOW UP EVALUATIONS..... 16**

39 8.1 One (1) week lab (Co-trimoxazole assigned subjects ONLY) ..... 16

40 8.2 One (1) month phone contact ..... 16

41 8.3 Three (3) month lab for antimicrobial assigned subjects ONLY ..... 16

42 8.4 Six (6) month lab for antimicrobial assigned subjects ONLY ..... 17

43 8.5 Six (6) month phone contact (for standard care arm) ..... 17

44 8.6 Twelve (12) month in-person visit ..... 17

45 8.7 Eighteen (18) month phone contact..... 17

46 8.8 Twenty-four (24) month in-person visit ..... 18

47 8.9 Thirty (30) month phone contact ..... 18

48 8.10 Thirty-six (36) month phone contact..... 18

49 **9. OUTCOME DETERMINATIONS ..... 19**

50 9.1 Primary Endpoint..... 19

51 9.2 Secondary Endpoints ..... 19

52 9.3 Role of the CleanUP-IPF Adjudication Committee ..... 19

53 **10. PARTICIPANT SAFETY AND ADVERSE EVENTS..... 20**

54 10.1 Institutional Review Boards ..... 20

55 10.2 Informed Consent..... 20

56 10.3 Summary of the Risks and Benefits ..... 20

57 10.4 Adverse Events ..... 20

58 10.5 Serious Adverse Events ..... 21

59 10.6 Pregnancy ..... 23

60 **11. STATISTICAL CONSIDERATIONS ..... 23**

61 11.1 Overview ..... 23

62 11.2 Analysis of Primary Endpoint ..... 23

63 11.3 Sample Size Justification ..... 24

64 11.4 Analysis of Secondary Endpoints ..... 25

65 **12. DATA MANAGEMENT PROCEDURES ..... 25**

66 12.1 Overview of Data Management ..... 25

67 12.2 Design and Development ..... 25

68 12.3 Data Collection Forms ..... 25

69 12.4 Data Acquisition and Entry ..... 25

70 12.5 Data Editing ..... 26

71 12.6 Data Security ..... 26

72 **13. STUDY ADMINISTRATION ..... 26**

73 13.1 Data and Safety Monitoring Board ..... 26

74 13.2 Statistical Monitoring Plan ..... 26

75 13.3 Site Training Requirements ..... 27

76 **14. REFERENCES ..... 28**

77 **15. APPENDIX A – Schedule of Assessments ..... 29**

78 **16. APPENDIX B – CleanUP-IPF Laboratory Schedule ..... 31**

79

80

81 **1. EXECUTIVE SUMMARY**

82

|                      |                                                                                                                                                                                                                                                                                                                                                                                                                                                                                                                                                                                                                                                                                                                                                                                                                                                                                                                                                                                                                              |
|----------------------|------------------------------------------------------------------------------------------------------------------------------------------------------------------------------------------------------------------------------------------------------------------------------------------------------------------------------------------------------------------------------------------------------------------------------------------------------------------------------------------------------------------------------------------------------------------------------------------------------------------------------------------------------------------------------------------------------------------------------------------------------------------------------------------------------------------------------------------------------------------------------------------------------------------------------------------------------------------------------------------------------------------------------|
| Title:               | <b><i>Study of <u>C</u>linical <u>E</u>fficacy of <u>A</u>ntimicrobial Therapy Strategy Using <u>P</u>ragmatic Design in <u>I</u>diopathic <u>P</u>ulmonary <u>F</u>ibrosis (CleanUP-IPF)</i></b>                                                                                                                                                                                                                                                                                                                                                                                                                                                                                                                                                                                                                                                                                                                                                                                                                            |
| Location:            | Approximately 20-40 clinical sites in the United States                                                                                                                                                                                                                                                                                                                                                                                                                                                                                                                                                                                                                                                                                                                                                                                                                                                                                                                                                                      |
| Objectives:          | To compare the impact of an antimicrobial therapy strategy on clinical outcomes (hospitalization or death)                                                                                                                                                                                                                                                                                                                                                                                                                                                                                                                                                                                                                                                                                                                                                                                                                                                                                                                   |
| Study Design:        | 500-patient, randomized, un-blinded, phase III, multicenter clinical trial of an antimicrobial therapy strategy in idiopathic pulmonary fibrosis patients                                                                                                                                                                                                                                                                                                                                                                                                                                                                                                                                                                                                                                                                                                                                                                                                                                                                    |
| Treatment Regimens:  | <p>1:1 randomization to either oral antibiotic (co-trimoxazole or doxycycline) in addition to standard-of-care or standard-of-care alone.</p> <p>The subject randomized to antimicrobial therapy will be treated with trimethoprim 160mg/800mg sulfamethoxazole (double strength co-trimoxazole) twice a day plus folic acid 5 mg daily unless there is a contraindication to this therapy.</p> <p>If the subject develops an intolerance to co-trimoxazole the dosage can be decreased to once a day 160mg trimethoprim/800mg sulfamethoxazole (one double strength co-trimoxazole) three times weekly plus folic acid 5 mg daily.</p> <p>If intolerance continues with co-trimoxazole then the antimicrobial agent can be changed to doxycycline (without folic acid).</p> <p>Subjects with a contraindication to co-trimoxazole will be treated with doxycycline (without folic acid). Doxycycline will be dosed at 100 mg once daily if body weight is &lt; 50 kg and 100 mg twice daily if <math>\geq</math> 50 kg.</p> |
| Primary Endpoint:    | Time to first non-elective, respiratory hospitalization or all-cause mortality                                                                                                                                                                                                                                                                                                                                                                                                                                                                                                                                                                                                                                                                                                                                                                                                                                                                                                                                               |
| Secondary Endpoints: | <ul style="list-style-type: none"> <li>• Time to death from any cause</li> <li>• Time to first non-elective, respiratory hospitalization</li> <li>• Time to first non-elective, all-cause hospitalization</li> <li>• Total number of non-elective respiratory hospitalizations</li> <li>• Total number of non-elective all-cause hospitalizations</li> <li>• Change in FVC from randomization to 12 months</li> <li>• Change in DLCO from randomization to 12 months</li> <li>• Total respiratory infections</li> </ul>                                                                                                                                                                                                                                                                                                                                                                                                                                                                                                      |

|  |                                                                                                                                                                                                                                                                                                                                                                                                                                                             |
|--|-------------------------------------------------------------------------------------------------------------------------------------------------------------------------------------------------------------------------------------------------------------------------------------------------------------------------------------------------------------------------------------------------------------------------------------------------------------|
|  | <ul style="list-style-type: none"><li>• Change in UCSD-Shortness of Breath Questionnaire and Fatigue Severity Scale score from randomization to 12 months</li><li>• Change in Leicester Cough Questionnaire score from randomization to 12 months</li><li>• Change in EQ-5D score and SF-12 score from randomization to 12 months</li><li>• Change in ICEpop CAPability measure for Older people (ICECAP-O) score from randomization to 12 months</li></ul> |
|--|-------------------------------------------------------------------------------------------------------------------------------------------------------------------------------------------------------------------------------------------------------------------------------------------------------------------------------------------------------------------------------------------------------------------------------------------------------------|

83

84

85

## Overview of the Pulmonary Trials Cooperative and the CleanUP-IPF study

86 The CleanUP-IPF trial is a collaborative effort involving the following groups:

- 87 1. National Institutes of Health
- 88 2. National Heart, Lung, and Blood Institute
- 89 3. University of Pittsburgh
- 90 4. Weill Cornell University
- 91 5. Duke Clinical Research Institute
- 92 6. Clinical Sites

93 The CleanUP-IPF leadership team shall be referred to as the “CleanUP-IPF Protocol Leadership Group”  
 94 (PLG). The CleanUP-IPF PLG is one of multiple PLGs which comprise the Pulmonary Trials Cooperative  
 95 (PTC). The following flow chart depicts each group which makes up the PTC:

96

97

98

99

100

101

102

103

104

105

106

107

108

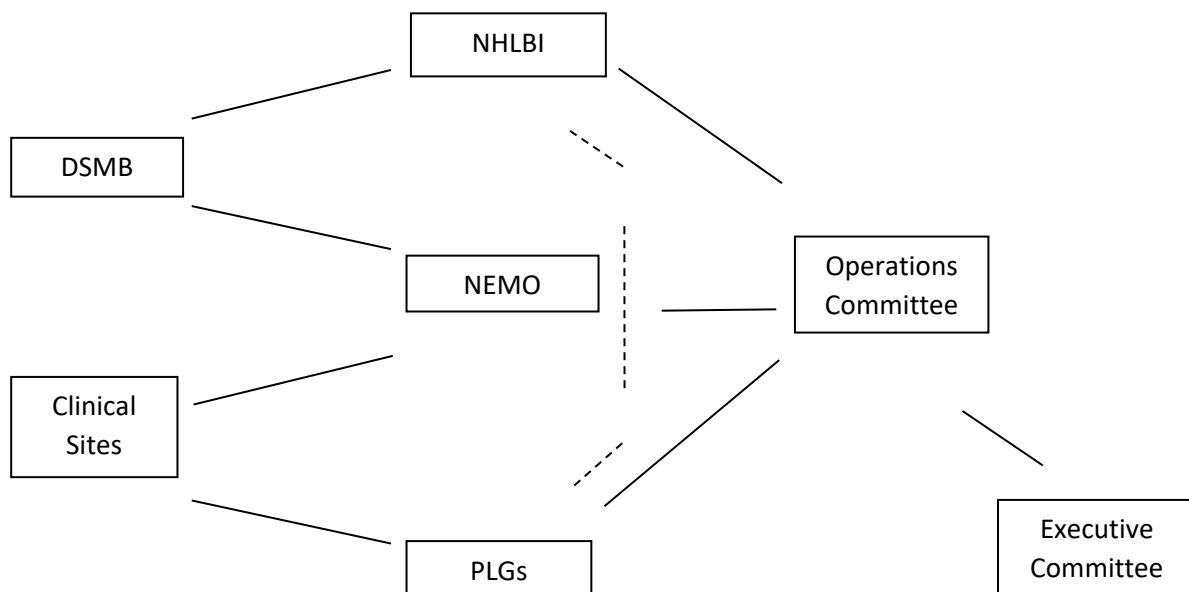

### 109 Organizational Components

- 110 ▪ Protocol Leadership Groups (PLGs) – design and carry out clinical studies
- 111 ▪ Network Management Core (NEMO) – facilitate the research conducted by the PTC
- 112 ▪ Operations Committee – primary responsibility for the implementation, oversight, and
- 113 continuing evaluation of PTC studies
- 114 ▪ Executive Committee – provide leadership and oversight to the PTC at large
- 115 ▪ Clinical Sites – recruit and enroll participants, deliver the study intervention, complete clinic
- 116 visits and phone calls, collect and enter data, and carry out procedures as defined by each
- 117 study’s protocol

- 118       ▪ Data and Safety Monitoring Board (DSMB) – review the design of each study, monitor patient  
119       safety, and review progress  
120       ▪ NHLBI Project Office – oversight for the whole endeavor  
121

122 More information about the PTC and CleanUP-IPF can be found at ...  
123

124 <http://www.pulmonarytrials.org/>

125

126 <https://clinicaltrials.gov/ct2/show/NCT02759120>

127



128 **2. HYPOTHESES AND OBJECTIVES**

129 **2.1 Primary Objective and Hypothesis**

130 The **primary objective** of the **CleanUP-IPF** study is to compare the effect of standard care vs. standard  
131 care plus antimicrobial therapy (co-trimoxazole or doxycycline) on clinical outcomes in patients  
132 diagnosed with idiopathic pulmonary fibrosis.

133 Our **overall hypothesis** is that reducing harmful microbial impact with antimicrobial therapy will reduce  
134 the risk of non-elective, respiratory hospitalization or death in patients with IPF.

135 **2.2 Secondary Objectives**

136 Secondary objectives of this protocol will be to examine the effect of this treatment strategy for the  
137 following endpoints:

- 138 • Time to death from any cause
- 139 • Time to first non-elective, respiratory hospitalization
- 140 • Time to first non-elective, all-cause hospitalization
- 141 • Total number of non-elective respiratory hospitalizations
- 142 • Total number of non-elective all-cause hospitalizations
- 143 • Change in FVC from randomization to 12 months
- 144 • Change in DLCO from randomization to 12 months
- 145 • Total number of respiratory infections
- 146 • Change in UCSD-Shortness of Breath Questionnaire from randomization to 12 months
- 147 • Change in Fatigue Severity Scale score from randomization to 12 months
- 148 • Change in Leicester Cough Questionnaire score from randomization to 12 months
- 149 • Change in EQ-5D score and SF-12 score from randomization to 12 months
- 150 • Change in ICEpop CAPability measure for Older people (ICECAP-O) score from  
151 randomization to 12 months
- 152

153 **3. BACKGROUND AND RATIONALE**

154 Idiopathic pulmonary fibrosis (IPF), a fibrotic interstitial lung disease characterized by the  
155 histopathologic pattern of usual interstitial pneumonia (UIP), has a median survival of 3-5 years' post-  
156 diagnosis but exhibits heterogeneous longitudinal disease progression. Recent studies of pirfenidone  
157 and nintedanib confirm beneficial effects on longitudinal change in forced vital capacity but inconsistent  
158 benefits on clinical endpoints or health status. Both of these agents can be difficult to tolerate and are  
159 expensive.

160 A recent study showed that an abnormal lung microbial community is independently associated with  
161 disease progression in IPF subjects (COMET)<sup>1</sup>; this has been confirmed by a second investigative group<sup>2</sup>.  
162 Similarly, it has been demonstrated that polymorphisms in the TOLLIP gene are associated with impaired  
163 outcome in IPF patients<sup>3</sup>. Additional preliminary data suggest that a systemic marker of inflammatory  
164 cell activation is associated with IPF disease progression<sup>4</sup>. Lastly, preliminary data from COMET suggest  
165 that a circulating gene expression signature of altered host response is associated with the aberrant lung  
166 microbial community. Intriguingly, other investigative groups have suggested improved clinical  
167 outcomes in IPF patients treated with co-trimoxazole or doxycycline compared to matched placebo<sup>5-7</sup>.  
168 The totality of these data suggests that an abnormal lung microbiome interacting with genetic  
169 susceptibility in host response may be associated with impaired clinical outcomes in IPF.

170 Our principal hypothesis is that antimicrobial therapy in IPF patients will improve clinical outcomes in a  
171 pragmatic therapeutic trial. The study aims are:

172 **Aim 1.** To determine if antimicrobial therapy (co-trimoxazole or doxycycline) in addition to standard  
173 care compared to standard care alone improves the time to non-elective respiratory hospitalization or  
174 death.

175 **Aim 2.** To determine if response to antimicrobial therapy is a function of genetic susceptibility to  
176 impaired host response in IPF patients.

177 We propose to examine the potential of precision medicine by examining the interaction of  
178 antimicrobial therapy with baseline genotype. Our long-term goal is to define patient-specific therapy in  
179 IPF.

180

181

182

183 **4. STUDY POPULATION AND ELIGIBILITY CRITERIA**

184 **4.1 Inclusion Criteria**

- 185 1. ≥ 40 years of age  
186 2. Diagnosed with IPF by enrolling investigator  
187 3. Signed informed consent

188 **4.2 Exclusion Criteria**

- 189 1. Received antimicrobial therapy in the past 30 days for treatment purposes (antibiotic  
190 prophylaxis for procedures do not meet criteria, nor do antivirals)
- 191 2. Contraindicated for antibiotic therapy, including but not exclusive to:
- 192 a. Allergy or intolerance to BOTH tetracyclines AND trimethoprim, sulfonamides or  
193 their combination
- 194 b. Allergy or intolerance to tetracyclines AND known potassium level > 5 mEq/L in the past  
195 90 days.
- 196 i. If the enrolling physician feels the potassium level has normalized,  
197 documentation to that effect must be provided.
- 198 c. Allergy or intolerance to tetracyclines AND concomitant use of angiotensin  
199 converting enzyme inhibitor (ACEI), angiotensin receptor blocker (ARB), potassium  
200 sparing diuretic, dofetilide, methotrexate, azathioprine, mycophenolate mofetil,  
201 cyclophosphamide
- 202 d. Allergy or intolerance to tetracyclines AND known glucose-6-phosphate  
203 dehydrogenase deficiency
- 204 e. Allergy or intolerance to tetracyclines AND untreated folate or B12 deficiency
- 205 f. Allergy or intolerance to tetracyclines AND known renal insufficiency (defined as a GFR <  
206 30 ml/min within the past 90 days)
- 207 i. If the enrolling physician feels the renal dysfunction has resolved,  
208 documentation to that effect must be provided.
- 209 g. Seizure disorder on antiepileptic therapy.
- 210 3. Pregnant (as determined by urine dipstick pregnancy test at randomization), or anticipate  
211 becoming pregnant
- 212 4. Use of an investigational study agent for IPF therapy within the past 30 days, or an IV  
213 infusion with a half-life of four (4) weeks
- 214 5. Concomitant immunosuppression with azathioprine, mycophenolate, cyclophosphamide,  
215 or cyclosporine.

216  
217 Participation in other IPF clinical trials or registries, while participating in the CleanUP-IPF trial, is  
218 not exclusionary assuming the participant meets all other eligibility criteria.  
219

220 **5. TREATMENT INTERVENTIONS**

221 This will be an unblinded, randomized clinical trial comparing the following treatment strategies

- 222       • Standard care  
223       • Standard care + oral antimicrobial therapy

224  
225 Patients randomized to receive antimicrobial therapy will receive a prescription drug voucher for the  
226 medication (and folic acid if given co-trimoxazole) during the enrollment visit. To minimize risk to the  
227 participating subject and to maximize a positive outcome we have created an algorithm for  
228 antimicrobial therapy that encourages use of co-trimoxazole but allows doxycycline use.

229 **Figure 1** illustrates the proposed antimicrobial therapy algorithm. Contraindications to co-trimoxazole at  
230 enrollment include:

- 231       • allergy to sulfa products or trimethoprim  
232       • renal insufficiency (GFR < 30 mL/min, defined as estimated from the blood urea nitrogen  
233       and creatinine)  
234       • hyperkalemic (potassium > 5 mEq/L)  
235       • concomitantly taking an ACEI, ARB, potassium sparing diuretic, dofetilide, methotrexate,  
236       azathioprine, mycophenolate mofetil, cyclophosphamide  
237       • Other contraindication to co-trimoxazole in the investigator’s opinion

238 Subjects meeting any of the above and randomized to antibiotic therapy will take doxycycline instead.  
239 Subjects on vitamin A or retinoids will need to stop these medications if randomized to doxycycline.

240 Co-trimoxazole intolerance is defined by the investigator. Mild intolerance (e.g. nausea, abdominal pain,  
241 headaches, anorexia) may require a dose adjustment to half dose. Moderate intolerance (e.g.  
242 decreased leukocytes, mild increase in potassium) require a dose adjustment or a switch to doxycycline  
243 at the investigator’s discretion. A significant intolerance (e.g. leukopenia, hyperkalemia, decrease in GFR  
244 by more than 50% or to less than 30 ml/min, rash) requires stopping the co-trimoxazole and providing  
245 medical treatment as appropriate. Doxycycline should be started when medically appropriate in the  
246 opinion of the investigator after moderate or significant intolerance. All dose adjustments will be at the  
247 discretion of the treating physician(s) with the medical monitor available for consultation if needed.  
248 Dosing adjustments, and/or switching of co-trimoxazole to doxycycline, will be documented within the  
249 eCRFs, as well as the reason for the adjustment.

250

251 **Figure 1**

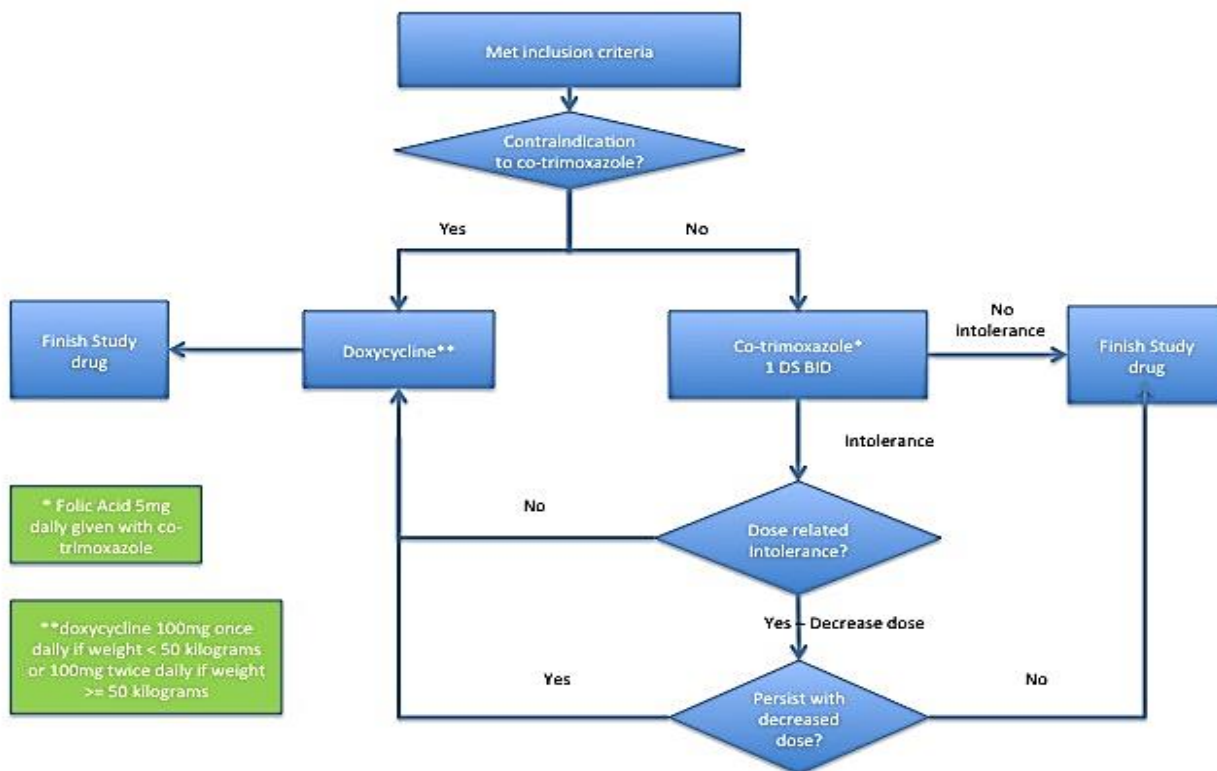

252

253 **5.1 Randomization**

254 All patients will be randomized using the study electronic data capture (EDC) system. Patients will be  
 255 randomized to treatment in a 1:1 allocation ratio using a simple randomization scheme.

256 **5.2 Blinding**

257 This study will be unblinded. Blinding would add substantial additional complexity without  
 258 commensurate incremental benefit related to testing the primary hypothesis of a treatment strategy  
 259 trial.

260 **5.3 Patient Safety and Concomitant Therapies**

261 This study will evaluate and compare treatment strategies of standard care and standard care +  
 262 antimicrobial therapy in patients with IPF.

263 Although investigators are encouraged to follow the assigned treatment strategy for the study duration,  
 264 in all cases the patient’s safety based on the clinical judgment of the treating physician will take priority  
 265 over the specific treatment assignment.

266 There is the potential of adverse cardiovascular events secondary to co-trimoxazole therapy; this is felt  
267 to possibly reflect a drug interaction with trimethoprim resulting in hyperkalemia<sup>8,9</sup>. Review of older  
268 literature suggests that the major risk factors for trimethoprim related hyperkalemia are higher  
269 trimethoprim dose and renal insufficiency with hypoaldosteronism, and potassium altering medications  
270 and age as probable risk factors<sup>10</sup>. Our inclusion/exclusion criteria should mitigate this risk as will  
271 monitoring for hyperkalemia early after the introduction of co-trimoxazole therapy<sup>10</sup>.

272 If a subject randomized to the antimicrobial strategy group develops an intolerance to co-trimoxazole  
273 the dosage should first be decreased to one double strength 160mg trimethoprim/ 800mg  
274 sulfamethoxazole (co-trimoxazole) three times weekly plus folic acid 5 mg daily. If intolerance continues  
275 with co-trimoxazole then the antimicrobial agent can be changed to doxycycline (with no 5mg folic acid).

276 Doxycycline will be dosed at 100 mg once daily if body weight is < 50 kg and 100 mg twice daily if  $\geq$  50  
277 kg, and no 5mg folic acid will be prescribed.

278

## 279 **6. RECRUITMENT AND SCREENING PROCEDURES**

### 280 **6.1 Common Recruitment/Screening Procedures**

281 All patients diagnosed at the participating centers with IPF will be screened by a study coordinator.  
282 Patients meeting eligibility criteria will be approached regarding participation in this study.

### 283 **6.2 Estimated Enrollment Period**

284 This study will enroll approximately 500 patients at 20-40 study sites. The projected enrollment timeline  
285 for enrollment is approximately 30 months.

## 286 **7. SCREENING EVALUATIONS AND RANDOMIZATION**

287 A complete schedule of assessments throughout the study is given in Appendix A.

### 288 **7.1 Screening**

289 After providing informed consent and signing the informed consent form (ICF), patients will be  
290 evaluated (via a physical examination) for eligibility into the study by ensuring that they:

- 291 • Are the appropriate age
- 292 • Have been diagnosed at the site with idiopathic pulmonary fibrosis
- 293 • Are not currently on antibiotic therapy, for treatment purposes (antibiotic prophylaxis for  
294 procedures do not meet criteria, nor do antivirals), and do not have any contraindications  
295 to antibiotic therapy.

### 296 **7.2 Screening Assessments**

297 Prior to randomization, the coordinator will document the following:

- 298 • Date of consent
- 299 • Patient characteristics (sex, race, ethnicity, age, height, weight)

- 300 • Information on how IPF diagnosis was made
- 301 • Known co-morbidities
- 302 • Details on patient history of gastroesophageal reflux disease (GERD)
- 303 • Physical exam findings
- 304 • Current concomitant medications
- 305 • Urine dipstick pregnancy test (for pre-menopausal female participants only)
- 306 • In recipients randomized to co-trimoxazole and taking digoxin, these recipients should
- 307 be notified of a possible drug interaction and have additional digoxin monitoring by the
- 308 provider monitoring digoxin levels for the patient.
- 309 • In recipients randomized to co-trimoxazole and taking warfarin, these recipients should
- 310 be notified of a possible drug interaction and have additional coagulation (defined as
- 311 PT/PTT/INR) monitoring by the provider monitoring coagulation labs for the patient.
- 312 • In recipients randomized to doxycycline and Vitamin A or retinoids, patients should be
- 313 notified of a drug interaction and must stop these medications prior to starting
- 314 doxycycline.
- 315 • Evaluation of seizure disorder and need for antiepileptic therapy. Antiepileptic therapy
- 316 is a contraindication for enrollment.

317 The following procedures will be performed prior to randomization, if results are not available from  
318 recent clinically indicated testing:

- 319 • Spirometry and DLCO assessments, if not done within 90 days of randomization for
- 320 clinical purposes.. The results of these tests will be recorded by the coordinator into the
- 321 EDC system.
- 322 • Quality of life questionnaires
- 323 • Buccal and fecal sample collection for microbial ecology. Subjects will be given a fecal
- 324 collection sample kit and instructions to take home.
- 325 • Urine pregnancy test for females who are able to become pregnant
- 326 • Blood draw for the following lab tests (**Described in Appendix B**):
  - 327 ○ Genotype
  - 328 ○ Gene expression
  - 329 ○ Chemistry panel and liver function tests– defined as minimum of sodium,
  - 330 potassium, chloride, bicarbonate, blood urea nitrogen (BUN), and creatinine,
  - 331 total bilirubin, direct bilirubin, alkaline phosphatase (ALP), alanine transaminase
  - 332 (ALT), and aspartate aminotransferase (AST)
  - 333 ○ Complete Blood Count (CBC)

334 If a subject does not meet the eligibility criteria due to a condition that subsequently resolves (e.g.,  
335 infection or renal insufficiency), they may be considered for enrollment once the condition resolves if  
336 they meet the all eligibility criteria at the time of randomization.

337 **7.3 Randomization**

338 After providing informed consent and signing the ICF, all eligible study subjects will be randomized in a  
339 1:1 allocation ratio to either receive or not receive a prescription drug voucher for daily antimicrobial  
340 therapy. Folic acid will also be included within the prescription drug voucher, for subjects randomized  
341 to co-trimoxazole therapy. Subjects should begin administration of drug without delay following  
342 randomization.

343 **8. FOLLOW UP EVALUATIONS**

344 All study participants will continue to be followed on a usual care basis. Refer to the schedule of  
345 assessments for more details. Study participants will be followed for up to a maximum of 36 months. It  
346 is anticipated that the overall study will end once the final enrolled patient completes their 12-month  
347 visit. Subjects randomized to antimicrobial therapy will remain on the assigned therapy until the end of  
348 the study or their 36-month study visit. Study participants are encouraged to contact their treating  
349 pulmonologist regarding their use of anti-microbial therapy after their study participation has ended. At  
350 the completion of the 36-month phone contact data collection will cease. To gain a better  
351 understanding of the long-term consequences of treatment, patients may be contacted up to 5 years  
352 after the end of their study participation. The primary analyses will be based on data collected until the  
353 end of the active treatment portion of the study.

354 **8.1 One (1) week lab (Co-trimoxazole assigned subjects ONLY)**

355 Approximately 1 week (visit window of 1 week +/- 3 days) after enrollment (and the beginning of  
356 administration of drug), subjects assigned to the antimicrobial therapy arm will return to the enrolling  
357 site or a local laboratory for the following:

- 358 • Blood drawn for electrolytes (**Described in Appendix B**)

359 **8.2 One (1) month phone contact**

360 Approximately 1 month (visit window of 1 month +/- 7 days) after enrollment, all subjects will be  
361 contacted by the site coordinator to document the following:

- 362 • Any issues related to drug assignment
- 363 • Vital status assessment
- 364 • Medication adherence
- 365 • Hospitalization and respiratory infection assessment

366 **8.3 Three (3) month lab for antimicrobial assigned subjects ONLY**

367 Approximately 3 months (visit window of 3 months +/- 7 days) after enrollment, subjects assigned to  
368 the antimicrobial therapy arm will return to the enrolling site or a local laboratory for the following:

- 369 • Blood draw for the following safety labs (**Described in Appendix B**):
  - 370 ○ Chemistry panel and liver function tests– defined as minimum of sodium,
  - 371 potassium, chloride, bicarbonate, BUN, and creatinine, total bilirubin, direct
  - 372 bilirubin, alkaline phosphatase, ALT, and AST
  - 373 ○ Complete blood count (CBC)



374 **8.4 Six (6) month lab for antimicrobial assigned subjects ONLY**

375 Approximately 6 months (visit window of 6 months +/- 7 days) after enrollment, subjects assigned to the  
376 antimicrobial therapy arm will return to the enrolling site or a local laboratory for the following:

- 377 • Blood drawn for the following safety labs (**Described in Appendix B**):
- 378 ○ Chemistry panel and liver function tests– defined as minimum of sodium,  
379 potassium, chloride, bicarbonate, BUN, and creatinine, total bilirubin, direct  
380 bilirubin, alkaline phosphatase, ALT, and AST
  - 381 ○ Complete blood count (CBC)
- 382 • Vital status Assessment
  - 383 • Medication adherence
  - 384 • Hospitalization and respiratory infection information

385 **8.5 Six (6) month phone contact (for standard care arm)**

386 Approximately 6 months (visit window of 6 months +/- 4 weeks) after enrollment, subjects randomized  
387 to the standard care arm **ONLY** will be contacted by the site coordinator to document the following:

- 388 • Vital status assessment
- 389 • Medication adherence
- 390 • Hospitalization and respiratory infection information

391 **8.6 Twelve (12) month in-person visit**

392 All subjects will return to the enrolling site approximately 12 months (visit window of 12 months +/- 4  
393 weeks) after enrollment and will complete the following:

- 394 • Quality-of-life questionnaires
- 395 • Spirometry and DLCO assessment
- 396 \*If a spirometry (with DLCO) assessment is available within 90 days of the in-person  
397 visit it may be used as the study assessment. Otherwise the spirometry assessment  
398 with DLCO should be conducted at the in-person visit.
- 399 • Blood draw for the following safety labs (for antimicrobial arm only):

  - 400 ○ Chemistry panel and liver function tests– defined as minimum of sodium,  
401 potassium, chloride, bicarbonate, BUN, and creatinine, total bilirubin, direct  
402 bilirubin, alkaline phosphatase, ALT, and AST

- 403 • Complete Blood Count (CBC) (for antimicrobial arm only)
- 404 • Blood draw for gene expression
- 405 • Buccal and fecal samples collection for microbial ecology

406 **8.7 Eighteen (18) month phone contact**

407 Approximately 18 months (visit window of 18 months +/- 4 weeks) after enrollment, all subjects will be  
408 contacted by the site coordinator to document the following:

- 409 • Vital status

- 410 • Medication adherence
- 411 • Hospitalization and respiratory infection information

### 412 **8.8 Twenty-four (24) month in-person visit**

413 All subjects will return to the enrolling site approximately 24 months (visit window of 24 months +/- 4  
414 weeks) after enrollment and will complete the following:

- 415 • Quality-of-life questionnaires
- 416 • Spirometry and an DLCO assessment
  - 417 \*If a spirometry (with DLCO) assessment is available within 90 days of the in-person
  - 418 visit it may be used as the study assessment. Otherwise the spirometry assessment
  - 419 with DLCO should be conducted at the in-person visit.
- 420 • Blood draw for the following safety labs (for antimicrobial arm only):
  - 421 ○ Chemistry panel and liver function tests– defined as minimum of sodium,
  - 422 potassium, chloride, bicarbonate, BUN, and creatinine, total bilirubin, direct
  - 423 bilirubin, alkaline phosphatase, ALT, and AST
- 424 • Complete Blood Count (CBC) (for antimicrobial arm only)
- 425 • Blood draw for gene expression
- 426 • Buccal and fecal samples collection for microbial ecology

### 427 **8.9 Thirty (30) month phone contact**

428 Approximately 30 months (visit window of 30 months +/- 4 weeks) after enrollment, subjects will be  
429 contacted by the site coordinator to document the following:

- 430 • Vital status
- 431 • Medication adherence
- 432 • Hospitalization and respiratory infection information

### 433 **8.10 Thirty-six (36) month phone contact**

434 Approximately 36 months (visit window of 36 months +/- 4 weeks) after enrollment, subjects will be  
435 contacted by the site coordinator to document the following:

- 436 • Vital status
- 437 • Medication adherence
- 438 • Hospitalization and respiratory infection information

439

440 Participants randomized to the antimicrobial arm who are still taking study drug at this visit should  
441 consult with their treating pulmonologist about continuing any prescriptions for antimicrobial therapies,  
442 as prescription drug voucher coverage will cease after completion of the 36 month phone contact. Data  
443 collection for study purposes will cease after completion of the 36-month phone contact.

## 444 9. OUTCOME DETERMINATIONS

### 445 9.1 Primary Endpoint

446 The primary endpoint of this study will be the time to first non-elective, respiratory hospitalization or all-  
447 cause mortality.

### 448 9.2 Secondary Endpoints

- 449 • Time to death from any cause
- 450 • Time to first non-elective respiratory hospitalization
- 451 • Time to first non-elective all-cause hospitalization
- 452 • Total number of non-elective respiratory hospitalizations
- 453 • Total number of non-elective all-cause hospitalizations
- 454 • Change in FVC from randomization to 12 months
- 455 • Change in DLCO from randomization to 12 months
- 456 • Total number of respiratory infections
- 457 • Change in UCSD-Shortness of Breath Questionnaire from randomization to 12 months
- 458 • Change in Fatigue Severity Scale score from randomization to 12 months
- 459 • Change in Leicester Cough Questionnaire score from randomization to 12 months
- 460 • Change in EQ-5D score and SF-12 score from randomization to 12 months
- 461 • Change in ICEpop CAPability measure for Older people (ICECAP-O) score from  
462 randomization to 12 months

### 463 9.3 Role of the CleanUP-IPF Adjudication Committee

464 An Adjudication Committee will classify all hospitalization events. The Adjudication Committee will  
465 follow procedures described in the Adjudication Charter. Briefly, medical records from inpatient  
466 hospitalizations will be obtained by the data coordinating center through an established, secure process  
467 which will be detailed in the informed consent document. Non-elective respiratory hospitalizations will  
468 be defined as any unplanned inpatient hospitalizations for which the primary cause was a pulmonary  
469 condition, in the opinion of the blinded adjudicators and based on all available clinical data. Examples  
470 include, but are not limited to, the following:

- 471 -acute exacerbation of IPF (definite or suspected)
- 472 -pulmonary infection/pneumonia
- 473 -pulmonary embolus
- 474 -pneumothorax
- 475 -pulmonary aspiration
- 476 -ARDS of identifiable cause

477 These causes will be adjudicated by review of admission history and physical and discharge summary  
478 from the hospitalization. These documents will be obtained (with patient consent) by the DCC from the  
479 hospital where the encounter occurred. Documents will be made available to adjudicators in PDF form

480 via the secure and integrated data management system (IBM Clinical Development Endpoint  
481 Adjudication Module) at the DCC. Each hospitalization event will be adjudicated by one of the study  
482 pulmonologists from the adjudication committee, ensuring that the adjudicator is independent from the  
483 study site at which the event occurred. If this adjudication is in agreement with the site investigator’s  
484 assessment (with regard to date of event, elective vs. non-elective and respiratory vs. non-respiratory),  
485 this assessment will serve as the final event adjudication. In the event of the independent adjudicator’s  
486 assessment disagreeing with the site investigator’s assessment, a second blinded member of the  
487 adjudication committee, also independent of the involved site, will serve as a “tiebreaker”.

488 Hospitalizations occurring primarily for lung transplantation will be considered “elective,” as the timing  
489 of lung transplant events is unpredictable because of donor lung availability rather than occurrence of  
490 acute or worsening illness. On the other hand, hospitalizations initially caused by an acute pulmonary  
491 condition but during which lung transplantation later occurs will be considered non-elective. Non-  
492 pulmonary causes of dyspnea, such as cardiac disease, will not be considered respiratory causes of  
493 hospitalizations.

## 494 **10. PARTICIPANT SAFETY AND ADVERSE EVENTS**

### 495 **10.1 Institutional Review Boards**

496 All CleanUP-IPF sites will submit the study protocol, informed consent form, and other study documents  
497 to their IRB for approval—the approval letter for each clinical center will be stored at the CC. Any  
498 amendments to the protocol, other than minor administrative changes, must be approved by each IRB  
499 before they are implemented.

### 500 **10.2 Informed Consent**

501 All patients will have the purpose of the study, the study interventions and evaluations, and the  
502 potential risks and benefits of participation explained to them and their questions answered. If they  
503 consent to participation in this study, they will review and sign the informed consent form.

### 504 **10.3 Summary of the Risks and Benefits**

505 This study will evaluate an antimicrobial therapy strategy in patients with IPF. These agents are  
506 currently used in clinical practice. We therefore do not anticipate that participation in this study will be  
507 associated with increased risks beyond that of standard IPF therapy. We have added limited  
508 exclusionary criteria to minimize risk of antimicrobial therapy.

509 Potential benefits to study participants include the possibility of improvements in clinical outcomes.

### 510 **10.4 Adverse Events**

511 Adverse events (AEs) of special interest ONLY will be collected for the CleanUP-IPF trial. These AEs  
512 include:

- 513 • Arrhythmia
- 514 • Vomiting
- 515 • Diarrhea
- 516 • Rash

517 • Hyperkalemia

518 These adverse events of special interest will be collected via data entry into the eCRF within the  
519 electronic data capture system. Start and stop dates will also be collected for these events, as well as  
520 any concomitant medications prescribed (with start and stop dates of the concomitant medication) for  
521 treatment of such events.

## 522 10.5 Serious Adverse Events

523 Any adverse Event that meets any of the following criteria: (1) results in death; (2) is life-  
524 threatening (i.e. places a participant at immediate risk of death from the event as it occurred);  
525 (3) requires inpatient hospitalization or prolongation of existing hospitalization; (4) results in a  
526 persistent or significant disability/incapacity; (5) results in a congenital anomaly/birth defect;  
527 OR (6) any other adverse event that, based upon appropriate medical judgment, may  
528 jeopardize the participant's health and may require medical or surgical intervention to prevent  
529 one of the other outcomes listed in this definition (e.g. allergic bronchospasm requiring  
530 intensive treatment in the emergency room or at home).

531

532 Information about all serious adverse events, whether volunteered by the subject, discovered by  
533 investigator questioning, or detected through physical examination, laboratory test or other means, will  
534 be collected and recorded on the Serious Adverse Event eCRF.

535

536 For this study, all SAEs occurring from the time of drug administration to 30 days post-study completion  
537 visit will be captured on the SAE eCRF. As the Month 36 Visit is a Phone Call Visit, review of subjects'  
538 medical records is required, in order to evaluate any SAEs within 30 days post-study completion visit.  
539 Unless exempted as described below, all SAEs, whether or not deemed drug-related, must be reported  
540 by the investigator or qualified designee within 1 business day of first becoming aware of the event. The  
541 investigator/qualified designee will enter the required information regarding the SAE into the  
542 appropriate module of the IBM Clinical Development, which will automatically result in distribution of  
543 the information to the Duke Clinical Research Institute Medical Monitor and Clinical Operations team,  
544 and the Network Management Core (NEMO). If IBM Clinical Development is temporarily unavailable, the  
545 event, including the investigator-determined causality to study drug, should be reported via a paper  
546 back-up SAE form to the DCRI Medical Monitor and Clinical Operations team, and the NEMO. Upon  
547 return of the availability of EDC system, the SAE information must be entered into the eCRF.

548

549 **Follow-up:** When additional relevant information becomes available, the Investigator will record follow-  
550 up information according to the same process used for reporting the initial event as described above.  
551 The Investigator will follow all reportable events until resolution, stabilization or the event is otherwise  
552 explained.

553

554 Investigators are also responsible for promptly reporting SAEs to their reviewing IRB/EC in accordance  
555 with local requirements.

556

557 The DCRI Medical Monitor and Clinical Operations team, and NEMO will follow all SAEs until resolution,  
558 stabilization, until otherwise explained or until the last subject completes the final follow-up, whichever  
559 occurs first. The DCRI Medical Monitor and Clinical Operations team will report all SAEs to the CleanUP-

560 IPF trial team within 1-2 business day(s) of receipt and notify the Data Safety Monitoring Board (DSMB)  
561 chair monthly. If no events have occurred, the DCRI Clinical Operations team will notify the NEMO, and  
562 NEMO will notify the DSMB chair as such.

563  
564 An independent DSMB will review composite data at regular intervals throughout the study.  
565 The DSMB will be empowered to stop the study for evidence of efficacy or harm.  
566

567 Events Relatedness refers to the extent to which an adverse event is considered to be related  
568 to the intervention or study procedures. An adverse event is considered related if there is a  
569 reasonable possibility that the event may have been caused by the procedure. The following  
570 definitions apply to relatedness, per the Pulmonary Trials Cooperative's Manual of Operations:

571 1) Unrelated: adverse event is clearly due to extraneous causes (e.g., underlying disease,  
572 environment)

573 2) Unlikely: (adverse event **must meet 2** of the following criteria):

- 574 • Does not have temporal relationship to intervention
- 575 • Could readily have been produced by the participant's clinical state
- 576 • Could have been due to environmental or other interventions
- 577 • Does not follow known pattern of response to intervention
- 578 • Does not reappear or worsen with reintroduction of intervention
- 579

580 3) Possible: (adverse event **must meet 2** of the following criteria):

- 581 • Has a reasonable temporal relationship to intervention
- 582 • Could not readily have been produced by the participant's clinical state
- 583 • Could not readily have been due to environmental or other interventions
- 584 • Follows a known pattern of response to intervention
- 585

586 4) Probable: (adverse event **must meet 3** of the following criteria):

- 587 • Has a reasonable temporal relationship to intervention
- 588 • Could not readily have been produced by the participant's clinical state or have been
- 589 due to environmental or other interventions
- 590 • Follows a known pattern of response to intervention
- 591 • Disappears or decreases with reduction in dose or cessation of intervention
- 592

593 5) Definite: (adverse event **must meet 4** of the following criteria):

- 594 • Has a reasonable temporal relationship to intervention
- 595 • Could not readily have been produced by the participant's clinical state or have been
- 596 due to environmental or other interventions
- 597 • Follows a known pattern of response to intervention
- 598 • Disappears or decreases with reduction in dose or cessation of intervention and recurs
- 599 with re-exposure

## 600 10.6 Pregnancy

601 Pregnancy occurring during a clinical investigation, although not considered a serious adverse event,  
602 must be reported to DCRI within the same timelines as a SAEs. The pregnancy will be recorded on the  
603 appropriate paper pregnancy tracking form. The pregnancy will be followed until final outcome. Any  
604 associated SAEs that occur to the mother or fetus/child will be recorded in the SAE eCRF, within IBM  
605 Clinical Development.

606 All pre-menopausal female participants will have a urine sample collected at their screening/baseline  
607 visit, and a urine dipstick pregnancy test will be completed.

608 In an effort to prevent pregnancies from occurring during a subject's participation in the study, women  
609 of child-bearing potential must use two acceptable methods of contraception at the same time unless  
610 the subject has had a surgical sterilization, in which case no additional contraception is required.  
611 Medically acceptable contraceptives include: (1) documented surgical sterilization (such as a  
612 hysterectomy, tubal ligation), (2) barrier methods (such as a condom or diaphragm) used with a  
613 spermicide, (3) hormonal contraception (combination oral contraceptives, transdermal patch,  
614 injectables, implantables, or vaginal ring) or (4) an intrauterine device (IUD) or intrauterine system (IUS).  
615 Abstinence is not an acceptable form of contraception in this study.

616 Male participants must also agree to take all necessary measures to avoid causing pregnancy in their  
617 sexual partners during the study. Medically acceptable contraceptives include: (1) surgical sterilization  
618 (such as a vasectomy), or (2) a condom used with a spermicidal. Contraceptive measures such as Plan B  
619 (<sup>TM</sup>), sold for emergency use after unprotected sex, are not acceptable methods for routine use.

## 620 11. STATISTICAL CONSIDERATIONS

### 621 11.1 Overview

622 Means, standard deviations, medians, 25<sup>th</sup> and 75<sup>th</sup> percentiles will be presented for continuous  
623 variables; the number and frequency of patients in each category will be presented for nominal  
624 variables. Statistical tests with a two-sided p value <0.05 will be considered statistically significant,  
625 unless otherwise stated. Analyses will be performed using SAS software (SAS Institute, Inc., Cary, NC).

### 626 11.2 Analysis of Primary Endpoint

627 Detailed description of the plan for statistical analysis of each endpoint will be detailed in a Statistical  
628 Analysis Plan. The primary analysis will be based on intention to treat. Crossovers will be tracked and  
629 we will have an alternate analysis cohort based on these data. Subjects receiving lung transplantation  
630 will be censored for all endpoints at the time of transplantation.

631 The statistical comparison of the two randomized arms with respect to the primary endpoint will be a  
632 time-to-event analysis, and therefore will be based on the time from randomization to first non-elective,  
633 respiratory hospitalization or death from any cause. The Cox proportional hazards regression model will  
634 be the primary tool to analyze and assess outcome differences between the two treatment arms. The  
635 Cox model will include an indicator variable for treatment group, age, sex, baseline DLCO (pp), baseline  
636 FVC (pp), use of NAC at enrollment, and choice of antimicrobial agent prior to randomization. Hazard  
637 ratios and 95% confidence intervals will summarize the differences between treatment arms.

638 For the primary analysis, subjects without any respiratory hospitalization or death event at the time of  
 639 analysis will be censored at their last visit or lung transplantation. The censoring mechanism is assumed  
 640 to be non-informative. Supportive analyses will be performed to assess the impact of a potential  
 641 informative censoring.

### 642 11.3 Sample Size Justification

643 Based on prior work from the study team using IPFnet data, it is anticipated that the event rate in the  
 644 placebo arm will be highly dependent on the proportion of patients enrolled at the different GAP scores.  
 645 Given the availability of two FDA-approved drugs for IPF, it is our belief that the study population will be  
 646 heavily weighted toward GAP scores of 3. In **Table 1**, the statistical power is determined for designs  
 647 enrolling 500 patients with placebo group events rates varying from 24% to 36% and (12-month)  
 648 treatment effects varying from 30% to 35%. In general, the proposed design provides adequate power  
 649 expect when the 12-month standard-of-care group event rate is 24% and the reduction in events is less  
 650 than 30%.

651 **Table 1.** Statistical Power Assuming a Sample Size of 500 Randomized Patients

| Standard-of-care event rate* | Antimicrobial therapy strategy event rate* | One-year Event Rate Reduction | Power |
|------------------------------|--------------------------------------------|-------------------------------|-------|
| 24%                          | 16.8%                                      | 30%                           | 78%   |
| 30%                          | 21.0%                                      | 30%                           | 87%   |
| 36%                          | 25.2%                                      | 30%                           | 93%   |
| 24%                          | 16.0%                                      | 33.3%                         | 86%   |
| 30%                          | 20.0%                                      | 33.3%                         | 93%   |
| 36%                          | 24.0%                                      | 33.3%                         | 97%   |
| 24%                          | 15.6%                                      | 35%                           | 89%   |
| 30%                          | 19.5%                                      | 35%                           | 95%   |
| 36%                          | 23.4%                                      | 35%                           | 98%   |

652 \*12-month event rates. Calculations assume a 2-sided Type-I error rate of 0.05. The minimum follow-up is planned  
 653 to be 12 months and the maximum follow-up is 42 months. Drop-out rates are assumed to be approximately 2%  
 654 per year. Power calculations were based on a log-rank test with assumed event rates were exponentially  
 655 distributed. Calculations were computing using nQuery 7.0 software.

656 We plan to enroll 500 patients over a 30 month window with a minimum of 12 months of follow-up on  
 657 all patients. **Table 2** shows the required number of endpoint events to have 80% to 90% power with  
 658 hazard ratios varying from 0.50 to 0.75.

659

660



661 **Table 2.** Required number of events

|           | HR=0.50 | HR=0.55 | HR=0.60 | HR=0.65 | HR=0.70 | HR=0.75 |
|-----------|---------|---------|---------|---------|---------|---------|
| 80% power | 65      | 88      | 120     | 169     | 247     | 379     |
| 85% power | 75      | 100     | 138     | 194     | 282     | 434     |
| 90% power | 87      | 118     | 161     | 226     | 330     | 508     |

662 Calculations performed using nQuery 7.0 and assume a 0.05 type I error rate (two-sided) with 1:1 randomization.

#### 663 **11.4 Analysis of Secondary Endpoints**

664 The analyses for the time-to-event secondary endpoints will be similar to those outlined for the primary  
665 endpoint using the time from randomization through the first occurrence of any component of a specific  
666 secondary endpoint (or censoring) as the response variable, and assessing group differences using the  
667 Cox proportional hazards model. Analyses of continuous secondary outcome variables will rely on a  
668 repeated measures approach, using mixed models and incorporating all available assessments. The  
669 analyses of all study endpoints will be detailed in the Statistical Analysis plan.

### 670 **12. DATA MANAGEMENT PROCEDURES**

#### 671 **12.1 Overview of Data Management**

672 The DCRI will have primary responsibility for data management, including the development of data  
673 collection systems, data monitoring processes, and data storage and back up. State-of-the-art  
674 technology will be used for the management of the network's data.

#### 675 **12.2 Design and Development**

676 The DCC will be responsible for development of the electronic case report forms (eCRFs), development  
677 and validation of the clinical study database, ensuring data integrity, and training clinical center staff on  
678 applicable data management procedures. A web-based distributed data entry model will be  
679 implemented. This system will be developed to ensure that guidelines and regulations surrounding the  
680 use of computerized systems used in clinical trials are upheld.

#### 681 **12.3 Data Collection Forms**

682 The data collection process consists of direct data entry at the study clinical centers into the IBM Clinical  
683 Development study database. Data entry should be completed according to the instructions provided  
684 and project specific training. The investigator is responsible for maintaining accurate, complete and up-  
685 to-date records, and for ensuring the completion of the data collection forms for each research  
686 participant.

#### 687 **12.4 Data Acquisition and Entry**

688 Data entry into eCRFs shall be performed by authorized individuals. Selected eCRFs may also require the  
689 investigator's written signature or electronic signature, as appropriate. Electronic CRFs will be  
690 monitored for completeness, accuracy, and attention to detail during the study.

691 **12.5 Data Editing**

692 Completed data will be entered into the IBM Clinical Development system. If incomplete or inaccurate  
693 data are found, a data clarification request will be generated and distributed to clinical centers for a  
694 response. Clinical centers will resolve data inconsistencies and errors and enter all corrections and  
695 changes into data management system and will adhere to the data entry and query response timelines  
696 specified by the CleanUP-IPF PLG.

697 **12.6 Data Security**

698 Access to databases will be controlled centrally by the DCRI through user passwords linked to  
699 appropriate privileges. This protects the data from unauthorized changes and inadvertent loss or  
700 damage. Database and web servers will be secured by a firewall and through controlled physical access.  
701 Database back up will be performed daily using standard procedures in place at the DCRI. All disk drives  
702 that provide network services, and all user computers, will be protected using virus-scanning software.

703 **13. STUDY ADMINISTRATION**

704 **13.1 Data and Safety Monitoring Board**

705 A DSMB will be appointed by the NHLBI for this trial. It will include individuals with pertinent expertise  
706 in IPF and clinical trials. The DSMB will advise the Steering Committee regarding the continuing safety of  
707 current participants and those yet to be recruited. It is anticipated that the DSMB will meet  
708 approximately 2 times per year to review safety and overall study progress.

709 **13.2 Statistical Monitoring Plan**

710 Safety and efficacy data will be periodically assessed by the DSMB. Safety and efficacy data will be  
711 periodically assessed by the DSMB. For ethical reasons, an interim examination of key safety and  
712 endpoint data will be performed at regular intervals during the course of the trial. The interim  
713 monitoring will also involve a review of the control arm event rates, patient recruitment, compliance  
714 with the study protocol, status of data collection, and other factors that reflect the overall progress and  
715 integrity of the study. An NHLBI-appointed DSMB will carefully and confidentially review the results of  
716 the interim analyses and status reports. If protocol modifications are warranted, close consultation  
717 among the DSMB, the NHLBI staff, and the study leadership will be required. A separate DSMB charter  
718 outlining the operating guidelines for the committee and the protocol for evaluation of data will be  
719 created prior to study enrollment and agreed upon during the initial meeting of the DSMB.

720 It is anticipated that the DSMB will meet at 6-month intervals to review the accumulating data. The DCRI  
721 will create regular reports to track patient enrollment reports, rates of compliance with the assigned  
722 testing strategy, and frequency of protocol violations. Prior to each meeting, the data coordinating  
723 center will conduct any requested statistical analyses and prepare a summary report along with the  
724 following information: patient enrollment reports, rates of compliance with the assigned testing  
725 strategy, frequency of protocol violations, and description of SAEs (statistical comparisons of the  
726 randomized arms with respect to these SAEs will use chi-square or other appropriate 2-sample  
727 methods).

728 There will be one planned interim review for efficacy. The efficacy review will focus on the composite  
729 endpoint of respiratory hospitalization or all-cause death and should occur once 300 enrolled subjects

730 have been followed for 12 months. The Lan-DeMets alpha spending function with O'Brien-Fleming type  
731 boundaries will be used for the interim analysis.

### 732 **13.3 Site Training Requirements**

733 Clinical sites participating in this study will be trained in the following aspects of the study including a  
734 protocol overview covering:

- 735 • Good Clinical Practice (GCP) overview
- 736 • Inclusion / exclusions
- 737 • Protocol activities
- 738 • Telephone contact methodology
- 739 • SAE reporting expectations
- 740 • Blood draw requirements
- 741 • Sample processing, storage, and shipping
- 742 • Electronic data capture
- 743 • Accessing the EDC
- 744 • Data entry requirements and scheduling expectations
- 745 • Query resolution procedures
- 746 • Uploading documentation for outcome event classification
- 747

748 **14. REFERENCES**

- 749 1. Han MK, Zhou Y, Murray S, et al. Lung microbiome and disease progression in idiopathic  
750 pulmonary fibrosis: an analysis of the COMET study. *Lancet Respir Med* 2014;2:548-56.
- 751 2. Molyneaux PL, Cox MJ, Willis-Owen SA, et al. The role of bacteria in the pathogenesis and  
752 progression of idiopathic pulmonary fibrosis. *Am J Respir Crit Care Med* 2014;190:906-13.
- 753 3. Noth I, Zhang Y, Ma SF, et al. Genetic variants associated with idiopathic pulmonary fibrosis  
754 susceptibility and mortality: a genome-wide association study. *Lancet Respir Med* 2013;1:309-17.
- 755 4. Moore BB, Fry C, Zhou Y, et al. Inflammatory leukocyte phenotypes correlate with disease  
756 progression in idiopathic pulmonary fibrosis. *Front Med* 2014;1.
- 757 5. Shulgina L, Cahn AP, Chilvers ER, et al. Treating idiopathic pulmonary fibrosis with the addition  
758 of co-trimoxazole: a randomised controlled trial. *Thorax* 2013;68:155-62.
- 759 6. Bhattacharyya P, Nag S, Bardhan S, et al. The role of long-term doxycycline in patients of  
760 idiopathic pulmonary fibrosis: The results of an open prospective trial. *Lung India* 2009;26:81-5.
- 761 7. Mishra A, Bhattacharya P, Paul S, Paul R, Swarnakar S. An alternative therapy for idiopathic  
762 pulmonary fibrosis by doxycycline through matrix metalloproteinase inhibition. *Lung India* 2011;28:174-  
763 9.
- 764 8. Fralick M, Macdonald EM, Gomes T, et al. Co-trimoxazole and sudden death in patients receiving  
765 inhibitors of renin-angiotensin system: population based study. *BMJ* 2014;349:g6196.
- 766 9. Scheper H, Lijfering WM. Link between co-trimoxazole and sudden death in patients receiving  
767 inhibitors of renin-angiotensin system could be due to confounding. *BMJ* 2014;349:g6899.
- 768 10. Perazella MA. Trimethoprim-induced hyperkalaemia: clinical data, mechanism, prevention and  
769 management. *Drug Saf* 2000;22:227-36.

770

771

772 **15. APPENDIX A – Schedule of Assessments**

| VISIT                                               | V1                           | V1A <sup>2</sup>       | V2                      | V2A <sup>3</sup>        | V2B <sup>3</sup>         | V3                          | V4                           | V5                           | V6                           | V7                           | V8                           |
|-----------------------------------------------------|------------------------------|------------------------|-------------------------|-------------------------|--------------------------|-----------------------------|------------------------------|------------------------------|------------------------------|------------------------------|------------------------------|
|                                                     | Screening/<br>Enrollment     | 1 Week (+/-<br>3 days) | 1 Month<br>(+/- 7 days) | 3 Month<br>(+/- 7 days) | 6 Month (+/-<br>4 weeks) | 6 Month<br>(+/- 4<br>weeks) | 12 Month<br>(+/- 4<br>weeks) | 18 Month<br>(+/- 4<br>weeks) | 24 Month<br>(+/- 4<br>weeks) | 30 Month<br>(+/- 4<br>weeks) | 36 Month<br>(+/- 4<br>weeks) |
| Task                                                |                              |                        | Phone Call              |                         |                          | Phone Call                  |                              | Phone Call                   |                              | Phone Call                   | Phone Call                   |
| Informed<br>Consent                                 | X                            |                        |                         |                         |                          |                             |                              |                              |                              |                              |                              |
| Physical Exam                                       | X                            |                        |                         |                         |                          |                             |                              |                              |                              |                              |                              |
| Medical History                                     | X                            |                        |                         |                         |                          |                             |                              |                              |                              |                              |                              |
| Randomization                                       | X                            |                        |                         |                         |                          |                             |                              |                              |                              |                              |                              |
| IPF Diagnosis<br>Checklist                          | X                            |                        |                         |                         |                          |                             |                              |                              |                              |                              |                              |
| Spirometry<br>(if not available<br>in last 90 days) | X                            |                        |                         |                         |                          |                             | X                            |                              | X                            |                              |                              |
| DLCO<br>(if not available<br>in last 90 days)       | X                            |                        |                         |                         |                          |                             | X                            |                              | X                            |                              |                              |
| Concomitant<br>Medication<br>Review                 | X                            |                        |                         |                         |                          |                             |                              |                              |                              |                              |                              |
| Concomitant<br>Medication<br>Update                 |                              |                        | X                       |                         |                          | X                           | X                            | X                            | X                            | X                            | X                            |
| Complete Blood<br>Count (CBC)                       | X<br>(if not<br>available in |                        |                         | X <sup>3</sup>          | X <sup>3</sup>           |                             | X <sup>3</sup>               |                              | X <sup>3</sup>               |                              |                              |

|                                                       |                                         |                |   |                |                |   |                |   |                |   |   |
|-------------------------------------------------------|-----------------------------------------|----------------|---|----------------|----------------|---|----------------|---|----------------|---|---|
|                                                       | last 90 days)                           |                |   |                |                |   |                |   |                |   |   |
| Chemistry panel w/liver function tests                | X<br>(if not available in last 90 days) |                |   | X <sup>3</sup> | X <sup>3</sup> |   | X <sup>3</sup> |   | X <sup>3</sup> |   |   |
| Electrolytes only                                     |                                         | X <sup>2</sup> |   |                |                |   |                |   |                |   |   |
| Genotype                                              | X                                       |                |   |                |                |   |                |   |                |   |   |
| Gene expression                                       | X                                       |                |   |                |                |   | X              |   | X              |   |   |
| Buccal Swab, Fecal samples                            | X                                       |                |   |                |                |   | X              |   | X              |   |   |
| Patient Reported Outcomes Questionnaires <sup>1</sup> | X                                       |                |   |                |                |   | X              |   | X              |   |   |
| Clinical Events                                       |                                         |                | X |                |                | X | X              | X | X              | X | X |
| Mortality                                             |                                         |                | X |                |                | X | X              | X | X              | X | X |
| Hospitalization                                       |                                         |                | X |                |                | X | X              | X | X              | X | X |
| Resp. infection                                       |                                         |                |   |                |                |   |                |   |                |   |   |

773  
774  
775  
776  
777

1. Patient reported questionnaires include: UCSD-SoBQ, Fatigue Severity Scale, Leicester Cough, EQ-5D, SF-12, ICECAP-O
2. For subjects receiving co-trimoxazole, a blood sample to document electrolytes will be drawn at week 1, Visit 1A.
3. For subjects assigned to the antimicrobial therapy arm, a blood sample to document complete blood count, liver function tests, and chemistry panel, will be drawn at 3 months, 6 months, 12 months, and 24 months to be obtained at Visit 2A, Visit 2B, Visit 4, and Visit 6, respectively.

778 **16. APPENDIX B – CleanUP-IPF Laboratory Schedule**

779

780 **Antimicrobial Arm (Co-trimoxazole and Doxycycline Arms)**

|                                                 | CBC | Electrolytes | Chemistry plus liver function tests | Gene expression | Genotype | Buccal sample | Fecal sample | Approx. total Blood Amount |
|-------------------------------------------------|-----|--------------|-------------------------------------|-----------------|----------|---------------|--------------|----------------------------|
| Baseline                                        | x   |              | x                                   | x               | x        | x             | x            | 28.5 ml                    |
| Week 1                                          |     | x*           |                                     |                 |          |               |              | 6 ml                       |
| 3 month                                         | x   |              | x                                   |                 |          |               |              | 8.5 ml                     |
| 6 month                                         | x   |              | x                                   |                 |          |               |              | 8.5 ml                     |
| 12 month                                        | x   |              | x                                   | x               |          | x             | x            | 18.5 ml                    |
| 24 month                                        | x   |              | x                                   | x               |          | x             | x            | 18.5 ml                    |
| <b>*only in co-trimoxazole treated patients</b> |     |              |                                     |                 |          |               |              | 88.5 ml                    |

781

782 **Standard of Care Arm**

|          | CBC | Chemistry plus liver function tests | Gene expression | Genotype | Buccal sample | Fecal sample | Approx. total Blood Amount |
|----------|-----|-------------------------------------|-----------------|----------|---------------|--------------|----------------------------|
| Baseline | x   | x                                   | x               | x        | x             | x            | 28.5 ml                    |
| 12 month |     |                                     | x               |          | x             | x            | 10 ml                      |
| 24 month |     |                                     | x               |          | x             | x            | 10 ml                      |
|          |     |                                     |                 |          |               |              | 48.5 ml                    |

783 **Safety Labs**

784 **Complete Blood Count (CBC):** WBC, RBC, hemoglobin, hematocrit, mean corpuscular volume (MCV), Platelets, mean platelet volume (MPV)

785 **Electrolytes:** Sodium, Potassium, Chloride, Carbon Dioxide (CO<sub>2</sub>)

786 **Chemistry:** Sodium, Potassium, Chloride, Carbon Dioxide (CO<sub>2</sub>), Urea Nitrogen (BUN) and Creatinine

787 **Liver Function Studies:** Alkaline Phosphatase, Total Bilirubin, Direct bilirubin, Aspartate Aminotransferase (AST), and Alanine Aminotransferase (ALT)

788

789

## **Protocol Amendment 1**

790

### **Summary of Changes**

791

792

793

794

*Study of Clinical Efficacy of Antimicrobial Therapy Strategy Using Pragmatic Design in Idiopathic Pulmonary*

795

796

*Fibrosis*

797

798

***(CleanUP-IPF)***

799

800

801

802

803

804

805

806

Version date: 15 April 2017

807

ClinicalTrials.gov ID: NCT02759120



## CleanUP-IPF Protocol Amendment 1 Summary of Changes Table:

| Page # | Text Within Original Protocol                                                                                                                                                                                                                                                                                                                                                                                                                                                                                                                                            | Text/Change Within Amendment 1                                                                                                                                                                                                                                                                                                                                                                                                                                                                                                                                                                                                                       |
|--------|--------------------------------------------------------------------------------------------------------------------------------------------------------------------------------------------------------------------------------------------------------------------------------------------------------------------------------------------------------------------------------------------------------------------------------------------------------------------------------------------------------------------------------------------------------------------------|------------------------------------------------------------------------------------------------------------------------------------------------------------------------------------------------------------------------------------------------------------------------------------------------------------------------------------------------------------------------------------------------------------------------------------------------------------------------------------------------------------------------------------------------------------------------------------------------------------------------------------------------------|
| 1      | N/A                                                                                                                                                                                                                                                                                                                                                                                                                                                                                                                                                                      | Added ClinicalTrials.gov ID number                                                                                                                                                                                                                                                                                                                                                                                                                                                                                                                                                                                                                   |
| 7 (5)  | N/A                                                                                                                                                                                                                                                                                                                                                                                                                                                                                                                                                                      | Added overview of PTC collaborative effort, graph of groups involved                                                                                                                                                                                                                                                                                                                                                                                                                                                                                                                                                                                 |
| 8 (6)  | N/A                                                                                                                                                                                                                                                                                                                                                                                                                                                                                                                                                                      | Added "Organizational Components" text                                                                                                                                                                                                                                                                                                                                                                                                                                                                                                                                                                                                               |
| 9      | Eligible patients will be randomized 1:1 to either receive or not receive a prescription drug voucher for oral antimicrobial therapy in the form of one double strength 160mg trimethoprim/800mg sulfamethoxazole (double strength co-trimoxazole) twice daily plus folic acid 5 mg daily OR doxycycline 100mg once daily if weight < 50 kilograms or 100mg twice daily if weight > 50 kilograms. Patients randomized to receive antimicrobial therapy will be given co-trimoxazole unless they have an allergy, contraindication to co-trimoxazole, renal insufficiency | Eligible patients will be randomized 1:1 to either receive or not receive a prescription drug voucher for oral antimicrobial therapy in the form of one double strength 160mg trimethoprim/800mg sulfamethoxazole (double strength co-trimoxazole) twice daily plus folic acid 5 mg daily OR doxycycline 100mg once daily if weight < 50 kilograms or 100mg twice daily if weight > 50 kilograms. Patients randomized to receive antimicrobial therapy will be given co-trimoxazole unless they have an allergy, contraindication to co-trimoxazole, renal insufficiency (GFR < 30 ml), are hyperkalemic (potassium > 5 mEq/L), or are concomitantly |

|    |                                                                                                                                                                                                                                                      |                                                                                                                                                                                                                                                        |
|----|------------------------------------------------------------------------------------------------------------------------------------------------------------------------------------------------------------------------------------------------------|--------------------------------------------------------------------------------------------------------------------------------------------------------------------------------------------------------------------------------------------------------|
|    | (GFR < 30 ml), are hyperkalemic (potassium > 5 mEq/L), or are concomitantly taking an angiotensin converting enzyme inhibitor (ACEI), angiotensin receptor blocker (ARB), or potassium sparing diuretic in which case they will receive doxycycline. | taking an angiotensin converting enzyme inhibitor (ACEI), angiotensin receptor blocker (ARB), potassium sparing diuretic, dofetilide, methotrexate, azathioprine, mycophenolate mofetil, cyclophosphamide in which case they will receive doxycycline. |
| 11 | Have 7ml of blood drawn for chemistry 6 panel for evaluation of renal function and potassium,                                                                                                                                                        | Have 8.5ml of blood drawn for chemistry 6 panel (including creatinine) for evaluation of renal function and potassium, and complete blood count if not available in last 3 months                                                                      |
| 11 | N/A                                                                                                                                                                                                                                                  | Added "Measure of DLCO, "                                                                                                                                                                                                                              |
| 11 | N/A                                                                                                                                                                                                                                                  | Added "Have urine collected for a urine dipstick pregnancy test (applicable only to pre-menopausal females)."                                                                                                                                          |
| 11 | Annually for the first two years (months 12 & 24)...                                                                                                                                                                                                 | Added 3 month and 6 month in-person visits (for blood draws), for patients randomized to co-trimoxazole ONLY.                                                                                                                                          |
| 12 | At 12 month visit... If assigned to the co-trimoxazole antimicrobial arm, have 7ml of blood drawn for chemistry 6 panel for evaluation of renal function and potassium                                                                               | At 12 month visit... If assigned to the co-trimoxazole antimicrobial arm, have 8.5ml of blood drawn for complete blood count, electrolytes, renal function, and liver function tests,                                                                  |
| 12 | Annually for the first two years (months 12 & 24)...                                                                                                                                                                                                 | At 24 months of study participation, subjects will return to the study site and will: <ul style="list-style-type: none"> <li>• Review hospitalizations,</li> <li>• Review medication adherence,</li> </ul>                                             |

|    |                                                                                                                                                                                                                                                                                                                                                                                                                                                                                                              |                                                                                                                                                                                                                                                                                                                                                                                                                                                                                                                                                                                                                                                                                                                                         |
|----|--------------------------------------------------------------------------------------------------------------------------------------------------------------------------------------------------------------------------------------------------------------------------------------------------------------------------------------------------------------------------------------------------------------------------------------------------------------------------------------------------------------|-----------------------------------------------------------------------------------------------------------------------------------------------------------------------------------------------------------------------------------------------------------------------------------------------------------------------------------------------------------------------------------------------------------------------------------------------------------------------------------------------------------------------------------------------------------------------------------------------------------------------------------------------------------------------------------------------------------------------------------------|
|    |                                                                                                                                                                                                                                                                                                                                                                                                                                                                                                              | <ul style="list-style-type: none"> <li>• Complete the patient reported outcome questionnaires,</li> <li>• Repeat the 10ml blood drawn for evaluation of blood gene expression,</li> <li>• If assigned to the co-trimoxazole antimicrobial arm, have 8.5ml of blood drawn for complete blood count, electrolytes, renal function, and liver function tests, and</li> <li>• Repeat the buccal swab and fecal sample for evaluation of change in the microbial ecology.</li> </ul>                                                                                                                                                                                                                                                         |
| 13 | <p>Exclusion Criteria #2: Contraindicated for antibiotic therapy, including but not exclusive to:</p> <ol style="list-style-type: none"> <li>a. Allergy or intolerance to BOTH tetracyclines AND trimethoprim, sulfonamides or their combination</li> <li>b. Allergy or intolerance to tetracyclines AND known potassium level &gt; 5 mEq/L in the past 6 months.</li> <li>i. If the enrolling physician feels the potassium level has normalized, documentation to that effect must be provided.</li> </ol> | <p>Exclusion Criteria #2: Contraindicated for antibiotic therapy, including but not exclusive to:</p> <ol style="list-style-type: none"> <li>a. Allergy or intolerance to BOTH tetracyclines AND trimethoprim, sulfonamides or their combination</li> <li>b. Allergy or intolerance to tetracyclines AND known potassium level &gt; 5 mEq/L in the past 6 months. <ol style="list-style-type: none"> <li>i. If the enrolling physician feels the potassium level has normalized, documentation to that effect must be provided.</li> </ol> </li> <li>c. Allergy or intolerance to tetracyclines AND concomitant use of angiotensin converting enzyme inhibitor (ACEI), angiotensin receptor blocker (ARB), potassium sparing</li> </ol> |

|    |                                                                                                                                                                                                                                                                                                                                                                                                                                                                                                                                                                                              |                                                                                                                                                                                                                                                                                                                                                                                                                                                                                                                                                                             |
|----|----------------------------------------------------------------------------------------------------------------------------------------------------------------------------------------------------------------------------------------------------------------------------------------------------------------------------------------------------------------------------------------------------------------------------------------------------------------------------------------------------------------------------------------------------------------------------------------------|-----------------------------------------------------------------------------------------------------------------------------------------------------------------------------------------------------------------------------------------------------------------------------------------------------------------------------------------------------------------------------------------------------------------------------------------------------------------------------------------------------------------------------------------------------------------------------|
|    | <p>c. Allergy or intolerance to tetracyclines AND concomitant use of ACEI, ARB, or potassium sparing diuretic</p> <p>d. Allergy or intolerance to tetracyclines AND known glucose-6-phosphate dehydrogenase deficiency</p> <p>e. Allergy or intolerance to tetracyclines AND untreated folate or B12 deficiency</p> <p>f. Allergy or intolerance to tetracyclines AND known renal insufficiency (defined as a GFR &lt; 30 ml within the previous 6 months)</p> <p>i. If the enrolling physician feels the renal dysfunction has resolved, documentation to that effect must be provided.</p> | <p>diuretic, dofetilide, methotrexate, azathioprine, mycophenolate mofetil, cyclophosphamide</p> <p>d. Allergy or intolerance to tetracyclines AND known glucose-6-phosphate dehydrogenase deficiency</p> <p>e. Allergy or intolerance to tetracyclines AND untreated folate or B12 deficiency</p> <p>f. Allergy or intolerance to tetracyclines AND known renal insufficiency (defined as a GFR &lt; 30 ml within the previous 6 months)</p> <p>i. If the enrolling physician feels the renal dysfunction has resolved, documentation to that effect must be provided.</p> |
| 13 | Exclusion Criteria #3: Pregnant, or anticipate becoming pregnant                                                                                                                                                                                                                                                                                                                                                                                                                                                                                                                             | Pregnant (as determined by urine dipstick pregnancy test at randomization), or anticipate becoming pregnant                                                                                                                                                                                                                                                                                                                                                                                                                                                                 |
| 13 | Exclusion Criteria #4: Use of an investigational study agent for IPF therapy within the past 30 days                                                                                                                                                                                                                                                                                                                                                                                                                                                                                         | Use of an investigational study agent for IPF therapy within the past 30 days, or an IV infusion with a half-life of four (4) weeks                                                                                                                                                                                                                                                                                                                                                                                                                                         |
| 14 | Patients randomized to receive antimicrobial therapy will receive a prescription drug voucher for the medication (and folic acid if given co-trimoxazole)                                                                                                                                                                                                                                                                                                                                                                                                                                    | Patients randomized to receive antimicrobial therapy will receive a prescription drug voucher for the medication (and folic acid if given co-trimoxazole) during the enrollment visit.                                                                                                                                                                                                                                                                                                                                                                                      |

|    |                                                                                                                                                                                                                                                                                                                                                                                                                  |                                                                                                                                                                                                                                                                                                                                                                                                                                                                                                                                                                        |
|----|------------------------------------------------------------------------------------------------------------------------------------------------------------------------------------------------------------------------------------------------------------------------------------------------------------------------------------------------------------------------------------------------------------------|------------------------------------------------------------------------------------------------------------------------------------------------------------------------------------------------------------------------------------------------------------------------------------------------------------------------------------------------------------------------------------------------------------------------------------------------------------------------------------------------------------------------------------------------------------------------|
|    | <p>during the enrollment visit. To minimize risk to the participating subject and to maximize a positive outcome we have created an algorithm for antimicrobial therapy that encourages use of co-trimoxazole but allows doxycycline use. Dose adjustments will be at the discretion of the treating physician(s) with strategies in place to maintain adherence (if possible) to the randomized medication.</p> | <p>To minimize risk to the participating subject and to maximize a positive outcome we have created an algorithm for antimicrobial therapy that encourages use of co-trimoxazole but allows doxycycline use. (Deleted "Dose adjustments...")</p>                                                                                                                                                                                                                                                                                                                       |
| 14 | <p>Figure 1 illustrates the proposed antimicrobial therapy algorithm.</p>                                                                                                                                                                                                                                                                                                                                        | <p>Figure 1 illustrates the proposed antimicrobial therapy algorithm. Contraindications to co-trimoxazole at enrollment include:</p> <ul style="list-style-type: none"> <li>• Allergy to sulfa products or trimethoprim</li> <li>• renal insufficiency (GFR &lt; 30 ml)</li> <li>• hyperkalemic (potassium &gt; 5 mEq/L)</li> <li>• concomitantly taking an angiotensin converting enzyme inhibitor (ACEI), angiotensin receptor blocker (ARB), potassium sparing diuretic, dofetilide, methotrexate, azathioprine, mycophenolate mofetil, cyclophosphamide</li> </ul> |

|    |                                                                                                       |                                                                                                                                                                                                                                                                                                                                                                                                                                                                                                                                                                                                                                                                                                                                                                                                                                                                                                                                                                                                                                                                                              |
|----|-------------------------------------------------------------------------------------------------------|----------------------------------------------------------------------------------------------------------------------------------------------------------------------------------------------------------------------------------------------------------------------------------------------------------------------------------------------------------------------------------------------------------------------------------------------------------------------------------------------------------------------------------------------------------------------------------------------------------------------------------------------------------------------------------------------------------------------------------------------------------------------------------------------------------------------------------------------------------------------------------------------------------------------------------------------------------------------------------------------------------------------------------------------------------------------------------------------|
|    |                                                                                                       | <ul style="list-style-type: none"> <li>• Other contraindication to co-trimoxazole in the investigator's opinion</li> </ul> <p>Subjects meeting any of the above and randomized to antibiotic therapy will take doxycycline instead.</p> <p>Co-trimoxazole intolerance is defined by the investigator. Mild intolerance (e.g. nausea, abdominal pain, headaches, anorexia) may require a dose adjustment to half dose. Moderate intolerance (e.g. decreased leukocytes, mild increase in potassium) require a dose adjustment or a switch to doxycycline at the investigator's discretion. A significant intolerance (e.g. leukopenia, hyperkalemia, decrease in GFR by more than 50% or to less than 30 ml, rash) requires stopping the co-trimoxazole and providing medical treatment as appropriate. Doxycycline should be started when medically appropriate in the opinion of the investigator after moderate or significant intolerance. All dose adjustments will be at the discretion of the treating physician(s) with the medical monitor available for consultation if needed.</p> |
| 17 | Section 8. "Baseline Evaluations and Randomization"                                                   | Section 8. "Screening Evaluations and Randomization"                                                                                                                                                                                                                                                                                                                                                                                                                                                                                                                                                                                                                                                                                                                                                                                                                                                                                                                                                                                                                                         |
| 17 | Section 8.1. Screening: After providing informed consent and signing the informed consent form (ICF), | Section 8.1. Screening: After providing informed consent and signing the informed consent form (ICF), patients will be                                                                                                                                                                                                                                                                                                                                                                                                                                                                                                                                                                                                                                                                                                                                                                                                                                                                                                                                                                       |

|    |                                                                                  |                                                                                                                                                                                                                                                                                                                                                                                                                                                                                                                                                                                                                                                                                                                                                             |
|----|----------------------------------------------------------------------------------|-------------------------------------------------------------------------------------------------------------------------------------------------------------------------------------------------------------------------------------------------------------------------------------------------------------------------------------------------------------------------------------------------------------------------------------------------------------------------------------------------------------------------------------------------------------------------------------------------------------------------------------------------------------------------------------------------------------------------------------------------------------|
|    | patients will be evaluated for eligibility into the study by ensuring that they: | evaluated <b>(via a physical examination)</b> for eligibility into the study by ensuring that they:                                                                                                                                                                                                                                                                                                                                                                                                                                                                                                                                                                                                                                                         |
| 18 | Section 8.2. "Baseline Assessments"                                              | Section 8.2. "Screening Assessments"                                                                                                                                                                                                                                                                                                                                                                                                                                                                                                                                                                                                                                                                                                                        |
| 18 | N/A                                                                              | Added to Section 8.2 "Screening Assessments": Urine dipstick pregnancy test (for pre-menopausal female participants only)                                                                                                                                                                                                                                                                                                                                                                                                                                                                                                                                                                                                                                   |
| 18 | N/A                                                                              | <p>Added to Section 8.2 "Screening Assessments": Evaluation of leukocyte count and platelet count in recipients randomized to co-trimoxazole</p> <ul style="list-style-type: none"> <li>○ Confirmation of normal leukocyte count and platelet count, obtained for clinical purposes, in the 3 months prior to enrollment.</li> <li>○ If prior laboratory values obtained for clinical purposes are not available, then a baseline value should be obtained with screening/enrollment laboratories</li> <li>● In recipients randomized to co-trimoxazole and taking digoxin, these recipients should be notified of a possible drug interaction and have additional digoxin monitoring by the provider monitoring digoxin levels for the patient.</li> </ul> |

|    |                                                                                                                                                                                                                    |                                                                                                                                                                                                                                                                                                                                                                                                                                                                                                |
|----|--------------------------------------------------------------------------------------------------------------------------------------------------------------------------------------------------------------------|------------------------------------------------------------------------------------------------------------------------------------------------------------------------------------------------------------------------------------------------------------------------------------------------------------------------------------------------------------------------------------------------------------------------------------------------------------------------------------------------|
|    |                                                                                                                                                                                                                    | <ul style="list-style-type: none"> <li>• In recipients randomized to co-trimoxazole and taking warfarin, these recipients should be notified of a possible drug interaction and have additional coagulation monitoring by the provider monitoring coagulation labs for the patient.</li> <li>• In recipients randomized to doxycycline and Vitamin A or retinoids, patients should be notified of a drug interaction and must stop these medications prior to starting doxycycline.</li> </ul> |
| 18 | Section 8.2. "Screening Assessments": "Subjects will undergo spirometry testing."                                                                                                                                  | Spirometry and DLCO assessments collected within 30 days of randomization are allowable. Otherwise spirometry and/or DLCO assessments should be repeated prior to randomization.                                                                                                                                                                                                                                                                                                               |
| 18 | Subjects will have 20 cc of blood drawn for genotype (10 cc) and gene expression (10cc), as well as buccal and fecal samples obtained for microbial ecology and blood for the chemistry 6 panel (7cc) if required. | Subjects will have 20 cc of blood drawn for genotype (10 cc) and gene expression (10cc), as well as buccal and fecal samples obtained for microbial ecology and blood for the complete blood panel with liver function panel (7cc) if required.                                                                                                                                                                                                                                                |
| 19 | Section 9. "Follow Up Evaluations": All study patients will continue to be followed on a usual care basis.                                                                                                         | All study patients will continue to be followed on a usual care basis. Refer to the schedule of assessments for more details. Study participants will be followed for up to a maximum of 36 months. It is anticipated that the active treatment portion of                                                                                                                                                                                                                                     |



|    |                                                                                                                                                                                                                                                                                                                                                             |                                                                                                                                                                                                                                                                                                                                                                                                          |
|----|-------------------------------------------------------------------------------------------------------------------------------------------------------------------------------------------------------------------------------------------------------------------------------------------------------------------------------------------------------------|----------------------------------------------------------------------------------------------------------------------------------------------------------------------------------------------------------------------------------------------------------------------------------------------------------------------------------------------------------------------------------------------------------|
|    | Refer to the schedule of assessments for more details.                                                                                                                                                                                                                                                                                                      | the study will continue until the final enrolled patient completes their 12-month in-person study visit. To gain a better understanding of the long-term consequences of treatment, patients may be contacted up to 5 years after the end of the active treatment portion of the study. The primary analyses will be based on data collected until the end of the active treatment portion of the study. |
| 19 | <p>9.1 One (1) week Laboratory test for co-trimoxazole assigned subjects</p> <p>Approximately 1 week after enrollment, subjects assigned to the co-trimoxazole arm of antimicrobial therapy will return to the enrolling site or at a local laboratory to have 7ml of blood drawn for chemistry 6 panel to evaluate renal function and potassium level.</p> | <p>9.1 One (1) week (+/- 3 days) Local Laboratory test for co-trimoxazole assigned subjects</p> <p>Approximately 1 week after enrollment, subjects assigned to the co-trimoxazole arm of antimicrobial therapy will return to the enrolling site or at a local laboratory to have 8.5ml of blood drawn for chemistry 6 panel (including creatinine) to evaluate renal function and potassium level.</p>  |
| 19 | 9.2 One (1) month phone contact                                                                                                                                                                                                                                                                                                                             | 9.2 One (1) month (+/- 7 days) phone contact                                                                                                                                                                                                                                                                                                                                                             |
| 19 | N/A                                                                                                                                                                                                                                                                                                                                                         | <p>9.3 Three (3) month (+/- 7 days) Local Laboratory test for co-trimoxazole assigned subjects</p> <p>Approximately 3 months after enrollment, subjects assigned to the co-trimoxazole arm of antimicrobial therapy will return to the enrolling site or at a local laboratory to have 8.5ml of blood drawn for complete blood count, electrolytes, renal</p>                                            |

|    |                                                                                                                                                  |                                                                                                                                                                                                                                                                                                                                                                                                                                                                                                                                                                                                                                                                                          |
|----|--------------------------------------------------------------------------------------------------------------------------------------------------|------------------------------------------------------------------------------------------------------------------------------------------------------------------------------------------------------------------------------------------------------------------------------------------------------------------------------------------------------------------------------------------------------------------------------------------------------------------------------------------------------------------------------------------------------------------------------------------------------------------------------------------------------------------------------------------|
|    |                                                                                                                                                  | function, and liver function. If the subject has had a recent laboratory value obtained for clinical purposes, the subject should submit those test results to the site or the site may obtain them directly. If the subject has not had a recent laboratory test, the subject should return to the site for the blood draw.                                                                                                                                                                                                                                                                                                                                                             |
| 20 | N/A                                                                                                                                              | <p>9.4 Six (6) month (+/- 7 days) Local Laboratory test for co-trimoxazole assigned subjects</p> <p>Approximately 3 months after enrollment, subjects assigned to the co-trimoxazole arm of antimicrobial therapy will return to the enrolling site or at a local laboratory to have 8.5ml of blood drawn for complete blood count, electrolytes, renal function, and liver function. If the subject has had a recent laboratory value obtained for clinical purposes, the subject should submit those test results to the site or the site may obtain them directly. If the subject has not had a recent laboratory test, the subject should return to the site for the blood draw.</p> |
| 20 | 9.5 Six (6) month phone contact                                                                                                                  | 9.5 Six (6) month (+/- 4 weeks) phone contact                                                                                                                                                                                                                                                                                                                                                                                                                                                                                                                                                                                                                                            |
| 20 | <p>9.6 Twelve (12) month in-person visit</p> <p>Subjects will return to the enrolling site approximately 12 months after enrollment and will</p> | <p>9.6 Twelve (12) month (+/- 4 weeks) in-person visit</p> <p>Subjects will return to the enrolling site approximately 12 months after enrollment and will complete a follow up</p>                                                                                                                                                                                                                                                                                                                                                                                                                                                                                                      |

|       |                                                                                                                                                                                                                                                                                                                                                                                                                                                                                        |                                                                                                                                                                                                                                                                                                                                                                                                                                                                                                                                                                  |
|-------|----------------------------------------------------------------------------------------------------------------------------------------------------------------------------------------------------------------------------------------------------------------------------------------------------------------------------------------------------------------------------------------------------------------------------------------------------------------------------------------|------------------------------------------------------------------------------------------------------------------------------------------------------------------------------------------------------------------------------------------------------------------------------------------------------------------------------------------------------------------------------------------------------------------------------------------------------------------------------------------------------------------------------------------------------------------|
|       | <p>complete a follow up spirometry assessment and quality-of-life questionnaires. Subjects will have 20 cc of blood drawn for genotype (10 cc) and gene expression (10cc) as well as buccal and fecal samples obtained for microbial ecology.</p> <ul style="list-style-type: none"> <li>For subjects assigned to Co-trimoxazole arm of antimicrobial therapy, a 7cc specimen of blood will be drawn for chemistry 6 panel, for evaluation of renal function and potassium.</li> </ul> | <p>spirometry assessment and quality-of-life questionnaires. If a spirometry assessment is available within 30 days of the in-person visit it may be used as the study assessment. Otherwise the spirometry assessment should be conducted at the in-person visit. Subjects will have 8.5ml of blood drawn for complete blood count, electrolytes, renal function, and liver function tests included, as well as 20 cc of blood drawn for genotype (10 cc) and gene expression (10cc). Buccal and fecal samples will also be obtained for microbial ecology.</p> |
| 20    | 9.7 Eighteen (18) month phone contact                                                                                                                                                                                                                                                                                                                                                                                                                                                  | 9.7 Eighteen (18) month (+/- 4 weeks) phone contact                                                                                                                                                                                                                                                                                                                                                                                                                                                                                                              |
| 20    | 9.8 Twenty-four (24) month in-person visit                                                                                                                                                                                                                                                                                                                                                                                                                                             | 9.8 Twenty-four (24) month (+/- 4 weeks) in-person visit                                                                                                                                                                                                                                                                                                                                                                                                                                                                                                         |
| 20-21 | <p>9.8 Twenty-four (24) month in-person visit</p> <p>Subjects will return to the enrolling site approximately 24 months after enrollment and will complete a follow up spirometry assessment and the quality-of-life questionnaires.</p> <ul style="list-style-type: none"> <li>For subjects assigned to Co-trimoxazole arm of antimicrobial therapy, a 7cc specimen of blood will be drawn for chemistry 6 panel to evaluate renal function and potassium level.</li> </ul>           | <p>9.8 Twenty-four (24) month (+/- 4 weeks) in-person visit</p> <p>Subjects will return to the enrolling site approximately 24 months after enrollment and will complete the quality-of-life questionnaires.</p> <ul style="list-style-type: none"> <li>For subjects assigned to Co-trimoxazole arm of antimicrobial therapy, a 8.5ml specimen of blood will be drawn for to evaluate complete blood count, electrolytes, renal function, and liver function tests.</li> </ul>                                                                                   |
| 21    | 9.9 Thirty (30) month phone contact                                                                                                                                                                                                                                                                                                                                                                                                                                                    | 9.9 Thirty (30) month (+/- 4 weeks) phone contact                                                                                                                                                                                                                                                                                                                                                                                                                                                                                                                |

|    |                                                                                                                                                                                                                                                                                                                                                                                                                                                    |                                                                                                                                                                                                                                                                                                                                                                                                                                                                                                                               |
|----|----------------------------------------------------------------------------------------------------------------------------------------------------------------------------------------------------------------------------------------------------------------------------------------------------------------------------------------------------------------------------------------------------------------------------------------------------|-------------------------------------------------------------------------------------------------------------------------------------------------------------------------------------------------------------------------------------------------------------------------------------------------------------------------------------------------------------------------------------------------------------------------------------------------------------------------------------------------------------------------------|
| 21 | 9.10 Thirty-six (36) month phone contact                                                                                                                                                                                                                                                                                                                                                                                                           | 9.10 Thirty-six (36) month (+/- 4 weeks) phone contact                                                                                                                                                                                                                                                                                                                                                                                                                                                                        |
| 22 | 9.11 Forty-two (42) month phone contact<br>Approximately 42 months after enrollment, subjects will be contacted by the site coordinator to document vital status, medication adherence, and to capture additional hospitalization and respiratory infection information.                                                                                                                                                                           | Removed Sections 9.11 "Forty-two (42) month phone contact"                                                                                                                                                                                                                                                                                                                                                                                                                                                                    |
|    |                                                                                                                                                                                                                                                                                                                                                                                                                                                    |                                                                                                                                                                                                                                                                                                                                                                                                                                                                                                                               |
| 22 | 10.3 Role of the CleanUP-IPF Adjudication Committee<br>An Adjudication Committee chaired by Dr. Michael Durham will classify all hospitalization events.                                                                                                                                                                                                                                                                                           | 10.3 Role of the CleanUP-IPF Adjudication Committee<br>An Adjudication Committee will classify all hospitalization events. (Removed reference to Dr. Michael Durham)                                                                                                                                                                                                                                                                                                                                                          |
| 22 | These causes will be adjudicated by review of admission history and physical and discharge summary from the hospitalization. These documents will be obtained (with patient consent) by the DCC from the hospital where the encounter occurred. Documents will be made available to adjudicators in PDF form via the secure and integrated data management system (Endpoint Adjudication Module For eClinical OS) at the DCC. Each hospitalization | These causes will be adjudicated by review of admission history and physical and discharge summary from the hospitalization. These documents will be obtained (with patient consent) by the DCC from the hospital where the encounter occurred. Documents will be made available to adjudicators in PDF form via the secure and integrated data management system (IBM Clinical Development Endpoint Adjudication Module) at the DCC. Each hospitalization event will be adjudicated by one of the study pulmonologists, from |

|       |                                                                                                                                                                                                            |                                                                                                                                                                                                                                                                                                                                                                                                                                                                                                                                                                                                                    |
|-------|------------------------------------------------------------------------------------------------------------------------------------------------------------------------------------------------------------|--------------------------------------------------------------------------------------------------------------------------------------------------------------------------------------------------------------------------------------------------------------------------------------------------------------------------------------------------------------------------------------------------------------------------------------------------------------------------------------------------------------------------------------------------------------------------------------------------------------------|
|       | <p>event will be adjudicated by two independent study pulmonologists, with an independent pulmonologist available as a “tiebreaker” in case of disagreements.</p>                                          | <p>the adjudication committee, ensuring that the adjudicator is independent from the study site at which the event occurred. If this adjudication is in agreement with the site investigator’s assessment (with regard to date of event, elective vs. non-elective and respiratory vs. non-respiratory), this assessment will serve as the final event adjudication. In the event of the independent adjudicator’s assessment disagreeing with the site investigator’s assessment, a second blinded member of the adjudication committee, also independent of the involved site, will serve as a “tiebreaker”.</p> |
| 23    | <p>11.1 Institutional Review Boards</p> <p>All sites will submit the study protocol, informed consent form, and other relevant study documents to their Institutional Review Board (IRB) for approval.</p> | <p>11.1 Institutional Review Boards</p> <p>All CleanUP-IPF sites will submit the study protocol, informed consent form, and other relevant study documents to their (IRB) for approval.—the approval letter for each clinical center will be stored at the CC. Any amendments to the protocol, other than minor administrative changes, must be approved by each IRB before they are implemented.</p>                                                                                                                                                                                                              |
| 23    | <p>11.4 Adverse Events</p> <p>Reporting of adverse events should follow the requirements of the local IRB.</p>                                                                                             | <p>11.4 Adverse Events</p> <p>Adverse events are not being collected for the CleanUP-IPF trial.</p>                                                                                                                                                                                                                                                                                                                                                                                                                                                                                                                |
| 23-24 | <p>11.5 Serious Adverse Events</p>                                                                                                                                                                         | <p>11.5 Serious Adverse Events</p>                                                                                                                                                                                                                                                                                                                                                                                                                                                                                                                                                                                 |

|  |  |                                                                                                                                                                                                                                                                                                                                                                                                                                                                                                                                                                                                                                                                                                                                                                                                                                                                                                                                                                                                                                                                                                                                                                                                                                                                                                                                                                                                                |
|--|--|----------------------------------------------------------------------------------------------------------------------------------------------------------------------------------------------------------------------------------------------------------------------------------------------------------------------------------------------------------------------------------------------------------------------------------------------------------------------------------------------------------------------------------------------------------------------------------------------------------------------------------------------------------------------------------------------------------------------------------------------------------------------------------------------------------------------------------------------------------------------------------------------------------------------------------------------------------------------------------------------------------------------------------------------------------------------------------------------------------------------------------------------------------------------------------------------------------------------------------------------------------------------------------------------------------------------------------------------------------------------------------------------------------------|
|  |  | <p>Any adverse Event that meets any of the following criteria: (1) results in death; (2) is life-threatening (i.e. places a participant at immediate risk of death from the event as it occurred); (3) requires inpatient hospitalization or prolongation of existing hospitalization; (4) results in a persistent or significant disability/incapacity; (5) results in a congenital anomaly/birth defect; OR (6) any other adverse event that, based upon appropriate medical judgment, may jeopardize the participant's health and may require medical or surgical intervention to prevent one of the other outcomes listed in this definition (e.g. allergic bronchospasm requiring intensive treatment in the emergency room or at home).</p> <p>Information about all serious adverse events, whether volunteered by the subject, discovered by investigator questioning, or detected through physical examination, laboratory test or other means, will be collected and recorded on the Adverse Event eCRF</p> <p>For this study, all SAEs occurring from the time of enrollment visit to 30 days post-study completion visit will be captured on the SAE eCRF. Unless exempted as described below, all SAEs, whether or not deemed drug-related, must be reported by the investigator or qualified designee within 1 business day of first becoming aware of the event. The investigator/qualified</p> |
|--|--|----------------------------------------------------------------------------------------------------------------------------------------------------------------------------------------------------------------------------------------------------------------------------------------------------------------------------------------------------------------------------------------------------------------------------------------------------------------------------------------------------------------------------------------------------------------------------------------------------------------------------------------------------------------------------------------------------------------------------------------------------------------------------------------------------------------------------------------------------------------------------------------------------------------------------------------------------------------------------------------------------------------------------------------------------------------------------------------------------------------------------------------------------------------------------------------------------------------------------------------------------------------------------------------------------------------------------------------------------------------------------------------------------------------|

|  |  |                                                                                                                                                                                                                                                                                                                                                                                                                                                                                                                                                                                                                                                                                                                                                                                                                                                                                                                                                                                                                                                                                                                                                                                                                                                                                           |
|--|--|-------------------------------------------------------------------------------------------------------------------------------------------------------------------------------------------------------------------------------------------------------------------------------------------------------------------------------------------------------------------------------------------------------------------------------------------------------------------------------------------------------------------------------------------------------------------------------------------------------------------------------------------------------------------------------------------------------------------------------------------------------------------------------------------------------------------------------------------------------------------------------------------------------------------------------------------------------------------------------------------------------------------------------------------------------------------------------------------------------------------------------------------------------------------------------------------------------------------------------------------------------------------------------------------|
|  |  | <p>designee will enter the required information regarding the SAE into the appropriate module of the eCOS eCRF, which will automatically result in distribution of the information to the Duke Clinical Research Institute Medical Monitor and Clinical Operations team, and the Network Management Core (NEMO). If eCOS is temporarily unavailable, the event, including the investigator-determined causality to study drug, should be reported via a paper back-up SAE form to the DCRI Medical Monitor and Clinical Operations team, and the NEMO. Upon return of the availability of EDC system, the SAE information must be entered into the eCRF.</p> <p><b>Follow-up:</b> When additional relevant information becomes available, the Investigator will record follow-up information according to the same process used for reporting the initial event as described above. The Investigator will follow all reportable events until resolution, stabilization or the event is otherwise explained.</p> <p>Investigators are also responsible for promptly reporting SAEs to their reviewing IRB/EC in accordance with local requirements.</p> <p>The DCRI Medical Monitor and Clinical Operations team, and NEMO will follow all SAEs until resolution, stabilization, until</p> |
|--|--|-------------------------------------------------------------------------------------------------------------------------------------------------------------------------------------------------------------------------------------------------------------------------------------------------------------------------------------------------------------------------------------------------------------------------------------------------------------------------------------------------------------------------------------------------------------------------------------------------------------------------------------------------------------------------------------------------------------------------------------------------------------------------------------------------------------------------------------------------------------------------------------------------------------------------------------------------------------------------------------------------------------------------------------------------------------------------------------------------------------------------------------------------------------------------------------------------------------------------------------------------------------------------------------------|

|       |                                                                                                                                                                                                                |                                                                                                                                                                                                                                                                                                                                                                                                                                                                                                                                                                                                                                                                                                                                                                                                               |
|-------|----------------------------------------------------------------------------------------------------------------------------------------------------------------------------------------------------------------|---------------------------------------------------------------------------------------------------------------------------------------------------------------------------------------------------------------------------------------------------------------------------------------------------------------------------------------------------------------------------------------------------------------------------------------------------------------------------------------------------------------------------------------------------------------------------------------------------------------------------------------------------------------------------------------------------------------------------------------------------------------------------------------------------------------|
|       |                                                                                                                                                                                                                | <p>otherwise explained or until the last subject completes the final follow-up, whichever occurs first. The DCRI Medical Monitor and Clinical Operations team will report all SAEs to the CleanUP-IPF trial team within 1-2 business day(s) of receipt and notify the Data Safety Monitoring Board (DSMB) chair monthly.</p>                                                                                                                                                                                                                                                                                                                                                                                                                                                                                  |
| 24-25 | <p>An Independent Data Safety Monitoring Board (DSMB) will review composite data at regular intervals throughout the study. The DSMB will be empowered to stop the study for evidence of efficacy or harm.</p> | <p>An Independent Data Safety Monitoring Board (DSMB) will review composite data at regular intervals throughout the study. The DSMB will be empowered to stop the study for evidence of efficacy or harm.</p> <p>Events related to worsening of IPF shall not be considered Serious Adverse Events.</p> <p>Relatedness refers to the extent to which an adverse event is considered to be related to the intervention or study procedures. An adverse event is considered related if there is a reasonable possibility that the event may have been caused by the procedure. The following definitions apply to relatedness, per the Pulmonary Trials Cooperative's Manual of Operations:</p> <p>1) Unrelated: adverse event is clearly due to extraneous causes (e.g., underlying disease, environment)</p> |



|  |  |                                                                                                                                                                                                                                                                                                                                                                                                                                                                                                                                                                                                                                                                                                                                                                                                                                            |
|--|--|--------------------------------------------------------------------------------------------------------------------------------------------------------------------------------------------------------------------------------------------------------------------------------------------------------------------------------------------------------------------------------------------------------------------------------------------------------------------------------------------------------------------------------------------------------------------------------------------------------------------------------------------------------------------------------------------------------------------------------------------------------------------------------------------------------------------------------------------|
|  |  | <p>2) Unlikely (adverse event must meet 2 of the following criteria):</p> <ul style="list-style-type: none"><li>• Does not have temporal relationship to intervention</li><li>• Could readily have been produced by the participant's clinical state</li><li>• Could have been due to environmental or other interventions</li><li>• Does not follow known pattern of response to intervention</li><li>• Does not reappear or worsen with reintroduction of intervention</li></ul> <p>3) Possible (adverse event must meet 2 of the following criteria):</p> <ul style="list-style-type: none"><li>• Has a reasonable temporal relationship to intervention</li><li>• Could not readily have been produced by the participant's clinical state</li><li>• Could not readily have been due to environmental or other interventions</li></ul> |
|--|--|--------------------------------------------------------------------------------------------------------------------------------------------------------------------------------------------------------------------------------------------------------------------------------------------------------------------------------------------------------------------------------------------------------------------------------------------------------------------------------------------------------------------------------------------------------------------------------------------------------------------------------------------------------------------------------------------------------------------------------------------------------------------------------------------------------------------------------------------|

|  |  |                                                                                                                                                                                                                                                                                                                                                                                                                                                                                                                                                                                                                                                                                                                                                                                                                                                                                                                                                                                       |
|--|--|---------------------------------------------------------------------------------------------------------------------------------------------------------------------------------------------------------------------------------------------------------------------------------------------------------------------------------------------------------------------------------------------------------------------------------------------------------------------------------------------------------------------------------------------------------------------------------------------------------------------------------------------------------------------------------------------------------------------------------------------------------------------------------------------------------------------------------------------------------------------------------------------------------------------------------------------------------------------------------------|
|  |  | <ul style="list-style-type: none"><li>• Follows a known pattern of response to intervention</li></ul> <p>4) Probable (adverse event must meet 3 of the following criteria):</p> <ul style="list-style-type: none"><li>• Has a reasonable temporal relationship to intervention</li><li>• Could not readily have been produced by the participant's clinical state or have been due to environmental or other interventions</li><li>• Follows a known pattern of response to intervention</li><li>• Disappears or decreases with reduction in dose or cessation of intervention</li></ul> <p>5) Definite (adverse event must meet 4 of the following criteria):</p> <ul style="list-style-type: none"><li>• Has a reasonable temporal relationship to intervention</li><li>• Could not readily have been produced by the participant's clinical state or have been due to environmental or other interventions</li><li>• Follows a known pattern of response to intervention</li></ul> |
|--|--|---------------------------------------------------------------------------------------------------------------------------------------------------------------------------------------------------------------------------------------------------------------------------------------------------------------------------------------------------------------------------------------------------------------------------------------------------------------------------------------------------------------------------------------------------------------------------------------------------------------------------------------------------------------------------------------------------------------------------------------------------------------------------------------------------------------------------------------------------------------------------------------------------------------------------------------------------------------------------------------|

|    |     |                                                                                                                                                                                                                                                                                                                                                                                                                                                                                                                                                                                                                                                                                                                                                                                                                                                                                                                                                                                                                                                                                                                                                                                               |
|----|-----|-----------------------------------------------------------------------------------------------------------------------------------------------------------------------------------------------------------------------------------------------------------------------------------------------------------------------------------------------------------------------------------------------------------------------------------------------------------------------------------------------------------------------------------------------------------------------------------------------------------------------------------------------------------------------------------------------------------------------------------------------------------------------------------------------------------------------------------------------------------------------------------------------------------------------------------------------------------------------------------------------------------------------------------------------------------------------------------------------------------------------------------------------------------------------------------------------|
|    |     | <ul style="list-style-type: none"> <li>Disappears or decreases with reduction in dose or cessation of intervention and recurs with re-exposure</li> </ul>                                                                                                                                                                                                                                                                                                                                                                                                                                                                                                                                                                                                                                                                                                                                                                                                                                                                                                                                                                                                                                     |
| 26 | N/A | <p>11.6 Pregnancy</p> <p>Pregnancy occurring during a clinical investigation, although not considered a serious adverse event, must be reported to DCRI within the same timelines as a serious adverse event. The pregnancy will be recorded on the appropriate paper pregnancy tracking form. The pregnancy will be followed until final outcome. Any associated SAEs that occur to the mother or fetus/child will be recorded in the SAE eCRF, within eCOS.</p> <p>All pre-menopausal female participants will be have a urine sample collected at their screening/baseline visit, and a urine dipstick pregnancy test will be completed.</p> <p>In an effort to prevent pregnancies from occurring during a subject's participation in the study, women of child-bearing potential must use two acceptable methods of contraception at the same time unless the subject has had a surgical sterilization, in which case no additional contraception is required. Medically acceptable contraceptives include: (1) documented surgical sterilization (such as a hysterectomy, tubal ligation), (2) barrier methods (such as a condom or diaphragm) used with a spermicide, (3) hormonal</p> |

|    |                                                                                                                                                                                                                                                                                                                                                                                                                                                                                |                                                                                                                                                                                                                                                                                                                                                                                                                                                                                                                                                                                                                                                                                                 |
|----|--------------------------------------------------------------------------------------------------------------------------------------------------------------------------------------------------------------------------------------------------------------------------------------------------------------------------------------------------------------------------------------------------------------------------------------------------------------------------------|-------------------------------------------------------------------------------------------------------------------------------------------------------------------------------------------------------------------------------------------------------------------------------------------------------------------------------------------------------------------------------------------------------------------------------------------------------------------------------------------------------------------------------------------------------------------------------------------------------------------------------------------------------------------------------------------------|
|    |                                                                                                                                                                                                                                                                                                                                                                                                                                                                                | <p>contraception (combination oral contraceptives, transdermal patch, injectables, implantables, or vaginal ring) or (4) an intrauterine device (IUD) or intrauterine system (IUS).</p> <p>Abstinence is not an acceptable form of contraception in this study.</p> <p>Male participants must also agree to take all necessary measures to avoid causing pregnancy in their sexual partners during the study. Medically acceptable contraceptives include: (1) surgical sterilization (such as a vasectomy), or (2) a condom used with a spermicidal. Contraceptive measures such as Plan B (TM), sold for emergency use after unprotected sex, are not acceptable methods for routine use.</p> |
| 29 | <p>13.3 Data Collection Forms</p> <p>The data collection process consists of direct data entry at the study clinical centers into the Merge eClinicalOS (eCOS) study database. Data entry should be completed according to the instructions provided and project specific training. The investigator is responsible for maintaining accurate, complete and up-to-date records, and for ensuring the completion of the data collection forms for each research participant.</p> | <p>13.3 Data Collection Forms</p> <p>The data collection process consists of direct data entry at the study clinical centers into the IBM eClinicalOS (eCOS) study database. Data entry should be completed according to the instructions provided and project specific training. The investigator is responsible for maintaining accurate, complete and up-to-date records, and for ensuring the completion of the data collection forms for each research participant.</p>                                                                                                                                                                                                                    |

|       |                                                                                                                                                                                                                                                                                                                                                                                                                                                                                                                                                                                                                                                                                                                            |                                                                                                                                                                                                                                                                                                                                                                                                                                                                                                                                                                                                                                                                                                                                                                |
|-------|----------------------------------------------------------------------------------------------------------------------------------------------------------------------------------------------------------------------------------------------------------------------------------------------------------------------------------------------------------------------------------------------------------------------------------------------------------------------------------------------------------------------------------------------------------------------------------------------------------------------------------------------------------------------------------------------------------------------------|----------------------------------------------------------------------------------------------------------------------------------------------------------------------------------------------------------------------------------------------------------------------------------------------------------------------------------------------------------------------------------------------------------------------------------------------------------------------------------------------------------------------------------------------------------------------------------------------------------------------------------------------------------------------------------------------------------------------------------------------------------------|
| 30-31 | <p>14.3 Site Training Requirements</p> <p>Clinical sites participating in this study will be trained in the following aspects of the study:</p> <p>Protocol overview, including:</p> <ul style="list-style-type: none"> <li>• Good Clinical Practice (GCP) overview</li> <li>• Inclusion /exclusions</li> <li>• Protocol activities</li> <li>• Telephone contact methodology</li> <li>• SAE reporting expectations</li> <li>• Blood draw requirements</li> <li>• Sample processing, storage, and shipping</li> <li>• Electronic data capture</li> <li>• Accessing the EDC</li> <li>• Data entry requirements and scheduling expectations</li> <li>• Query resolution procedures</li> <li>• Uploading CT images.</li> </ul> | <p>14.3 Site Training Requirements</p> <p>Clinical sites participating in this study will be trained in the following aspects of the study:</p> <p>Protocol overview, including:</p> <ul style="list-style-type: none"> <li>• Good Clinical Practice (GCP) overview</li> <li>• Inclusion /exclusions</li> <li>• Protocol activities</li> <li>• Telephone contact methodology</li> <li>• SAE reporting expectations</li> <li>• Blood draw requirements</li> <li>• Sample processing, storage, and shipping</li> <li>• Electronic data capture</li> <li>• Accessing the EDC</li> <li>• Data entry requirements and scheduling expectations</li> <li>• Query resolution procedures</li> <li>• Uploading documentation for outcome event classification</li> </ul> |
| 33    | 16. Appendix – Schedule of Assessments                                                                                                                                                                                                                                                                                                                                                                                                                                                                                                                                                                                                                                                                                     | 16. Appendix = Schedule of Assessments                                                                                                                                                                                                                                                                                                                                                                                                                                                                                                                                                                                                                                                                                                                         |

|    |                                                                                                                                                                                                                                                                                                                                        |                                                                                                                                                                                                                                                                                                                                                                                                                                                                                                                                                                                                |
|----|----------------------------------------------------------------------------------------------------------------------------------------------------------------------------------------------------------------------------------------------------------------------------------------------------------------------------------------|------------------------------------------------------------------------------------------------------------------------------------------------------------------------------------------------------------------------------------------------------------------------------------------------------------------------------------------------------------------------------------------------------------------------------------------------------------------------------------------------------------------------------------------------------------------------------------------------|
|    |                                                                                                                                                                                                                                                                                                                                        | <p>Updated to:</p> <ul style="list-style-type: none"> <li>• Add Physical Exam at Screening</li> <li>• Remove 42 month phone call</li> <li>• Add Visit 2A – 3 month (+/-7 days) – for subjects randomized to co-trimoxazole only</li> <li>• Add Visit 2B – 6 month (+/-7 days) – for subjects randomized to co-trimoxazole only</li> <li>• Add visit windows for all in-person visits and phone calls</li> <li>• Add Complete Blood Count, chemistry panel with liver function tests at Screening; and for subjects randomized to co-trimoxazole only at Visits 1A, 2A, 2B, 4, and 6</li> </ul> |
| 34 | <p>16. Appendix – Schedule of Assessments (Footnotes to Table)</p> <p>*Patient reported questionnaires include: UCSD-SoBQ, Fatigue Severity Scale, Leicester Cough, EQ-5D, SF-12, ICECAP-O</p> <p>** V1A - For subjects assigned to Co-trimoxazole, a blood sample to document GFR and potassium levels at 1 week, to be obtained.</p> | <p>16. Appendix – Schedule of Assessments (Footnotes to Table)</p> <p>*Patient reported questionnaires include: UCSD-SoBQ, Fatigue Severity Scale, Leicester Cough, EQ-5D, SF-12, ICECAP-O</p> <p>**For subjects assigned to Co-trimoxazole, a blood sample to document complete blood count and chemistry panel at 1 week, 3 months, 6 months, 12 months, and 24 months to be</p>                                                                                                                                                                                                             |

830

|  |  |                                                                               |
|--|--|-------------------------------------------------------------------------------|
|  |  | obtained at Visit 1A, Visit 2A, Visit 2B, Visit 4, and Visit 6, respectively. |
|--|--|-------------------------------------------------------------------------------|

831





833

834

## **Protocol Amendment 2**

835

### **Summary of Changes**

836

837

838

839

***Study of Clinical Efficacy of Antimicrobial Therapy Strategy Using Pragmatic Design in Idiopathic Pulmonary***

840

***Fibrosis***

841

***(CleanUP-IPF)***

842

843

844

845

846

847

848

849

Version date: 2 March 2018

850

ClinicalTrials.gov ID: NCT02759120

851

## CleanUP-IPF Protocol Amendment 2 Summary of Changes Table:

| Section # | Text Within Amendment 1                                                                                                                                     | Text/Change Within Amendment 2                                                                                                                                                                     |
|-----------|-------------------------------------------------------------------------------------------------------------------------------------------------------------|----------------------------------------------------------------------------------------------------------------------------------------------------------------------------------------------------|
| TOC       | N/A                                                                                                                                                         | Updated Table of Contents to correlate with Amendment 2 updates                                                                                                                                    |
| 1         | # sites within Executive Summary is 30-40                                                                                                                   | Updated # sites to 20-40                                                                                                                                                                           |
| 1         | “Organizational Components...”                                                                                                                              | Reformatted design of “Organizational Components” section, to provide clarity, and added web links for PTC site and ClinicalTrials.gov site listing for study                                      |
| 4         | “Basic Study Design” section 4                                                                                                                              | Removed “Study Design” text as Section 4. Section 4 now becomes “Study Population And Eligibility Criteria”                                                                                        |
| 4.2.2b    | Exc. Criteria 2b – “Allergy or intolerance to tetracyclines AND known potassium level > 5 mEq/L in the past 6 months.”                                      | Exc. Criteria 2b – “Allergy or intolerance to tetracyclines AND known potassium level > 5 mEq/L in the past 90 days. “                                                                             |
| 4.2.2f    | Exc. Criteria 2f – “Allergy or intolerance to tetracyclines AND known renal insufficiency (defined as a GFR < 30 ml/min within the previous past 6 months)” | Exc. Criteria 2f – “Allergy or intolerance to tetracyclines AND known renal insufficiency (defined as a GFR < 30 ml/min within the previous past 90 days)”                                         |
| 4.2.5     | “Concomitant immunosuppression with azathioprine, mycophenolate, cyclophosphamide, or cyclosporine.”                                                        | This item now becomes Exc. Criteria 5 - “Concomitant immunosuppression with azathioprine, mycophenolate, cyclophosphamide, or cyclosporine.”                                                       |
| 4.2       | N/A                                                                                                                                                         | Added “Participation in other IPF clinical trials or registries, while participating in the CleanUP-IPF trial, is not exclusionary assuming the participant meets all other eligibility criteria.” |
| 5         | Treatment Intervention: “Co-trimoxazole intolerance...”                                                                                                     | Added “Dosing adjustments, and/or switching of co-trimoxazole to doxycycline, will be documented within the eCRFs, as well as the reason for the adjustment.”                                      |
| 6.2       | Estimated Enrollment Period: “approximately 500 patients at 30-40 study sites. The projected timeline for enrollment...”                                    | Updated # sites, and enrollment timeline statement to: “approximately 500 patients at 20-40 study sites. The projected enrollment timeline...”                                                     |

|     |                                                                                                                                                                                                                                                                                                                                                                                                                                                                                            |                                                                                                                                                                                                                                                                                                                                                                                                                                                                                                                                                                                                                      |
|-----|--------------------------------------------------------------------------------------------------------------------------------------------------------------------------------------------------------------------------------------------------------------------------------------------------------------------------------------------------------------------------------------------------------------------------------------------------------------------------------------------|----------------------------------------------------------------------------------------------------------------------------------------------------------------------------------------------------------------------------------------------------------------------------------------------------------------------------------------------------------------------------------------------------------------------------------------------------------------------------------------------------------------------------------------------------------------------------------------------------------------------|
| 7.1 | <p>Screening:<br/>After providing informed consent and signing the informed consent form (ICF), patients will be evaluated (via a physical examination) for eligibility into the study by ensuring that they:</p> <ul style="list-style-type: none"> <li>• Are the appropriate age</li> <li>• Have been diagnosed at the site with idiopathic pulmonary fibrosis</li> <li>• Are not currently on antibiotic therapy and do not have any contraindications to antibiotic therapy</li> </ul> | <p>Updated to:<br/>Screening:<br/>After providing informed consent and signing the informed consent form (ICF), patients will be evaluated (via a physical examination) for eligibility into the study by ensuring that they:</p> <ul style="list-style-type: none"> <li>• Are the appropriate age</li> <li>• Have been diagnosed at the site with idiopathic pulmonary fibrosis</li> <li>• Are not currently on antibiotic therapy, for treatment purposes (antibiotic prophylaxis for procedures do not meet criteria, nor do antivirals), and do not have any contraindications to antibiotic therapy.</li> </ul> |
| 7.2 | Screening Assessments: “At the time of randomization...”                                                                                                                                                                                                                                                                                                                                                                                                                                   | Screening Assessments: “Prior to randomization...”                                                                                                                                                                                                                                                                                                                                                                                                                                                                                                                                                                   |
| 7.2 | <p>List of Screening Assessments:</p> <ul style="list-style-type: none"> <li>• Date of consent</li> <li>• Patient characteristics (Sex, race, ethnicity, age, height, weight)</li> <li>• Information on how IPF diagnosis was made</li> <li>• Known co-morbidities</li> <li>• Details on patient history of gastroesophageal reflux disease (GERD)</li> <li>• Current concomitant medications</li> </ul>                                                                                   | <p>List of Screening Assessments updated to:</p> <ul style="list-style-type: none"> <li>• Date of consent</li> <li>• Patient characteristics (sex, race, ethnicity, age, height, weight)</li> <li>• Information on how IPF diagnosis was made</li> <li>• Known co-morbidities</li> <li>• Details on patient history of gastroesophageal reflux disease (GERD)</li> <li>• Physical exam findings</li> <li>• Current concomitant medications</li> <li>• Urine dipstick pregnancy test (for pre-menopausal female participants only)</li> <li>• In recipients randomized to co-trimoxazole and taking</li> </ul>        |

|  |                                                                                                                                                                                                                                                                                                                                                                                                                                                                                                                                                                                                                                                                                                                                                                                                                                                                                                                                                                                                                                                                                                                 |                                                                                                                                                                                                                                                                                                                                                                                                                                                                                                                                                                                                                                                                                                                                                                                                                                                                                                                                                                                                                                                                                                                                                                                                                                                                                                                                                                                                                                                                                                                                                                                                                       |
|--|-----------------------------------------------------------------------------------------------------------------------------------------------------------------------------------------------------------------------------------------------------------------------------------------------------------------------------------------------------------------------------------------------------------------------------------------------------------------------------------------------------------------------------------------------------------------------------------------------------------------------------------------------------------------------------------------------------------------------------------------------------------------------------------------------------------------------------------------------------------------------------------------------------------------------------------------------------------------------------------------------------------------------------------------------------------------------------------------------------------------|-----------------------------------------------------------------------------------------------------------------------------------------------------------------------------------------------------------------------------------------------------------------------------------------------------------------------------------------------------------------------------------------------------------------------------------------------------------------------------------------------------------------------------------------------------------------------------------------------------------------------------------------------------------------------------------------------------------------------------------------------------------------------------------------------------------------------------------------------------------------------------------------------------------------------------------------------------------------------------------------------------------------------------------------------------------------------------------------------------------------------------------------------------------------------------------------------------------------------------------------------------------------------------------------------------------------------------------------------------------------------------------------------------------------------------------------------------------------------------------------------------------------------------------------------------------------------------------------------------------------------|
|  | <ul style="list-style-type: none"> <li>• Urine dipstick pregnancy test (for premenopausal female participants only)</li> <li>• Evaluation of renal function <ul style="list-style-type: none"> <li>○ Known renal insufficiency (defined as a GFR &lt;30 ml within the previous 6 months). <ul style="list-style-type: none"> <li>▪ If the enrolling physician feels the renal dysfunction has resolved, documentation to that effect must be provided.</li> </ul> </li> </ul> </li> <li>• Evaluation of potassium levels <ul style="list-style-type: none"> <li>○ Potassium level &gt;5 mEq/L in the past 6 months. <ul style="list-style-type: none"> <li>▪ If the enrolling physician feels the potassium level has normalized, documentation to that effect must be provided.</li> </ul> </li> </ul> </li> <li>• Evaluation of leukocyte count and platelet count in recipients randomized to co-trimoxazole <ul style="list-style-type: none"> <li>○ Confirmation of normal leukocyte count and platelet count, obtained for clinical purposes, in the 3 months prior to enrollment.</li> </ul> </li> </ul> | <p>digoxin, these recipients should be notified of a possible drug interaction and have additional digoxin monitoring by the provider monitoring digoxin levels for the patient.</p> <ul style="list-style-type: none"> <li>• In recipients randomized to co-trimoxazole and taking warfarin, these recipients should be notified of a possible drug interaction and have additional coagulation (defined as PT/PTT/INR) monitoring by the provider monitoring coagulation labs for the patient.</li> <li>• In recipients randomized to doxycycline and Vitamin A or retinoids, patients should be notified of a drug interaction and must stop these medications prior to starting doxycycline.</li> <li>• Evaluation of seizure disorder and need for antiepileptic therapy. Antiepileptic therapy is a contraindication for enrollment.</li> </ul> <p>The following procedures will be performed prior to randomization, if results are not available from recent clinically indicated testing:</p> <ul style="list-style-type: none"> <li>• Spirometry and DLCO assessments, if not done within 90 days of randomization for clinical purposes. The results of these tests will be recorded by the coordinator into the EDC system.</li> <li>• Quality of life questionnaires</li> <li>• Buccal and fecal sample collection for microbial ecology. Subjects will be given a fecal collection sample kit and instructions to take home.</li> <li>• Urine pregnancy test for females who are able to become pregnant</li> <li>• Blood draw for the following lab tests (<b>Described in Appendix B</b>):</li> </ul> |
|--|-----------------------------------------------------------------------------------------------------------------------------------------------------------------------------------------------------------------------------------------------------------------------------------------------------------------------------------------------------------------------------------------------------------------------------------------------------------------------------------------------------------------------------------------------------------------------------------------------------------------------------------------------------------------------------------------------------------------------------------------------------------------------------------------------------------------------------------------------------------------------------------------------------------------------------------------------------------------------------------------------------------------------------------------------------------------------------------------------------------------|-----------------------------------------------------------------------------------------------------------------------------------------------------------------------------------------------------------------------------------------------------------------------------------------------------------------------------------------------------------------------------------------------------------------------------------------------------------------------------------------------------------------------------------------------------------------------------------------------------------------------------------------------------------------------------------------------------------------------------------------------------------------------------------------------------------------------------------------------------------------------------------------------------------------------------------------------------------------------------------------------------------------------------------------------------------------------------------------------------------------------------------------------------------------------------------------------------------------------------------------------------------------------------------------------------------------------------------------------------------------------------------------------------------------------------------------------------------------------------------------------------------------------------------------------------------------------------------------------------------------------|

|  |                                                                                                                                                                                                                                                                                                                                                                                                                                                                                                                                                                                                                                                                                                                                                                                                                                                                                                                                                                                                                                                                                                                                    |                                                                                                                                                                                                                                                                                                                                                                                                                                                                                                                                                                                                                                                                                                                        |
|--|------------------------------------------------------------------------------------------------------------------------------------------------------------------------------------------------------------------------------------------------------------------------------------------------------------------------------------------------------------------------------------------------------------------------------------------------------------------------------------------------------------------------------------------------------------------------------------------------------------------------------------------------------------------------------------------------------------------------------------------------------------------------------------------------------------------------------------------------------------------------------------------------------------------------------------------------------------------------------------------------------------------------------------------------------------------------------------------------------------------------------------|------------------------------------------------------------------------------------------------------------------------------------------------------------------------------------------------------------------------------------------------------------------------------------------------------------------------------------------------------------------------------------------------------------------------------------------------------------------------------------------------------------------------------------------------------------------------------------------------------------------------------------------------------------------------------------------------------------------------|
|  | <ul style="list-style-type: none"> <li>○ If prior laboratory values obtained for clinical purposes are not available, then a baseline value should be obtained with screening/enrollment laboratories</li> <li>● In recipients randomized to co-trimoxazole and taking digoxin, these recipients should be notified of a possible drug interaction and have additional digoxin monitoring by the provider monitoring digoxin levels for the patient.</li> <li>● In recipients randomized to co-trimoxazole and taking warfarin, these recipients should be notified of a possible drug interaction and have additional coagulation monitoring by the provider monitoring coagulation labs for the patient.</li> <li>● In recipients randomized to doxycycline and Vitamin A or retinoids, patients should be notified of a drug interaction and must stop these medications prior to starting doxycycline.</li> </ul> <p>Spirometry and DLCO assessments collected within 30 days of randomization are allowable. Otherwise spirometry and/or DLCO assessments should be repeated prior to randomization. The results of these</p> | <ul style="list-style-type: none"> <li>○ Genotype</li> <li>○ Gene expression</li> <li>○ Chemistry panel and liver function tests– defined as minimum of sodium, potassium, chloride, bicarbonate, blood urea nitrogen (BUN), and creatinine, total bilirubin, direct bilirubin, alkaline phosphatase (ALP), alanine transaminase (ALT), and aspartate aminotransferase (AST)</li> <li>○ Complete Blood Count (CBC)</li> </ul> <p>If a subject does not meet the eligibility criteria due to a condition that subsequently resolves (e.g., infection or renal insufficiency), they may be considered for enrollment once the condition resolves if they meet all eligibility criteria at the time of randomization.</p> |
|--|------------------------------------------------------------------------------------------------------------------------------------------------------------------------------------------------------------------------------------------------------------------------------------------------------------------------------------------------------------------------------------------------------------------------------------------------------------------------------------------------------------------------------------------------------------------------------------------------------------------------------------------------------------------------------------------------------------------------------------------------------------------------------------------------------------------------------------------------------------------------------------------------------------------------------------------------------------------------------------------------------------------------------------------------------------------------------------------------------------------------------------|------------------------------------------------------------------------------------------------------------------------------------------------------------------------------------------------------------------------------------------------------------------------------------------------------------------------------------------------------------------------------------------------------------------------------------------------------------------------------------------------------------------------------------------------------------------------------------------------------------------------------------------------------------------------------------------------------------------------|

|     |                                                                                                                                                                                                                                                                                                                                                                                                                                                                                                                                                                                                                                                                                                     |                                                                                                                                                                                                                                                                                                                                                                                                                                                                                                                                                                                                                                                                                                                                                                                                                                                                                                                                                  |
|-----|-----------------------------------------------------------------------------------------------------------------------------------------------------------------------------------------------------------------------------------------------------------------------------------------------------------------------------------------------------------------------------------------------------------------------------------------------------------------------------------------------------------------------------------------------------------------------------------------------------------------------------------------------------------------------------------------------------|--------------------------------------------------------------------------------------------------------------------------------------------------------------------------------------------------------------------------------------------------------------------------------------------------------------------------------------------------------------------------------------------------------------------------------------------------------------------------------------------------------------------------------------------------------------------------------------------------------------------------------------------------------------------------------------------------------------------------------------------------------------------------------------------------------------------------------------------------------------------------------------------------------------------------------------------------|
|     | <p>tests will be recorded by the coordinator into the EDC system.</p> <p>Subjects will have 20 cc of blood drawn for genotype (10 cc) and gene expression (10cc), as well as buccal and fecal samples obtained for microbial ecology and blood for the complete blood panel with liver function panel (7cc) if required.</p> <p>Subject will complete the quality-of-life questionnaires. These responses will be entered into the EDC system.</p>                                                                                                                                                                                                                                                  |                                                                                                                                                                                                                                                                                                                                                                                                                                                                                                                                                                                                                                                                                                                                                                                                                                                                                                                                                  |
| 7.3 | <p>Randomization: “After providing informed consent and signing the ICF, all study subjects will be randomized...”</p>                                                                                                                                                                                                                                                                                                                                                                                                                                                                                                                                                                              | <p>Randomization, updated to: “After providing informed consent and signing the ICF, all eligible study subjects will be randomized...”</p> <p>Also added: “Folic acid will also be included within the prescription drug voucher, for subjects randomized to co-trimoxazole therapy.”</p>                                                                                                                                                                                                                                                                                                                                                                                                                                                                                                                                                                                                                                                       |
| 8   | <p>Follow Up Evaluations: “All study patients will continue to be followed on a usual care basis. Refer to the schedule of assessments for more details. Study participants will be followed for up to a maximum of 36 months. It is anticipated that the active treatment portion of the study will continue until the final enrolled patient completes their 12-month in-person study visit. To gain a better understanding of the long-term consequences of treatment, patients may be contacted up to 5 years after the end of the active treatment portion of the study. The primary analyses will be based on data collected until the end of the active treatment portion of the study.”</p> | <p>Follow Up Evaluation, updated to: “ All study participants will continue to be followed on a usual care basis. Refer to the schedule of assessments for more details. Study participants will be followed for up to a maximum of 36 months. It is anticipated that the overall study will end once the final enrolled patient completes their 12-month visit. Subjects randomized to antimicrobial therapy will remain on the assigned therapy until the end of the study or their 36-month study visit. Study participants are encouraged to contact their treating pulmonologist regarding their use of anti-microbial therapy after their study participation has ended. At the completion of the 36-month phone contact data collection will cease. To gain a better understanding of the long-term consequences of treatment, patients <u>may</u> be contacted up to 5 years after the end of their study participation. The primary</p> |

|     |                                                                                                                                                                                                                                                                                                                                                                            |                                                                                                                                                                                                                                                                                                                                                                                                                                                             |
|-----|----------------------------------------------------------------------------------------------------------------------------------------------------------------------------------------------------------------------------------------------------------------------------------------------------------------------------------------------------------------------------|-------------------------------------------------------------------------------------------------------------------------------------------------------------------------------------------------------------------------------------------------------------------------------------------------------------------------------------------------------------------------------------------------------------------------------------------------------------|
|     |                                                                                                                                                                                                                                                                                                                                                                            | analyses will be based on data collected until the end of the active treatment portion of the study.”                                                                                                                                                                                                                                                                                                                                                       |
| 8.1 | “One (1) week (+/- 3 days) Local Laboratory test for co-trimoxazole assigned subjects”                                                                                                                                                                                                                                                                                     | Updated to: “One (1) week lab (Co-trimoxazole assigned subjects <b>ONLY</b> )”                                                                                                                                                                                                                                                                                                                                                                              |
| 8.1 | “One (1) week lab (Co-trimoxazole assigned subjects <b>ONLY</b> ):<br>“Approximately 1 week after enrollment, subjects assigned to the co-trimoxazole arm of antimicrobial therapy will return to the enrolling site or at a local laboratory to have 8.5ml of blood drawn for chemistry 6 panel (including creatinine) to evaluate renal function and potassium level.”   | Updated to: “One (1) week lab (Co-trimoxazole assigned subjects <b>ONLY</b> )”<br>Approximately 1 week (visit window of 1 week +/- 3 days) after enrollment (and the beginning of administration of drug), subjects assigned to the antimicrobial therapy arm will return to the enrolling site or a local laboratory for the following: <ul style="list-style-type: none"> <li>• Blood drawn for electrolytes (<b>Described in Appendix B</b>)”</li> </ul> |
| 8.2 | “ <b>One (1) month (+/- 7 days) phone contact</b><br>Approximately 1 months after enrollment, subjects will be contacted by the site coordinator to document any issues related to drug assignment, vital status, medication adherence, and to capture additional hospitalization and respiratory infection information.”                                                  | Updated to: “ <b>One (1) month phone contact</b><br>Approximately 1 month (visit window of 1 month +/- 7 days) after enrollment, all subjects will be contacted by the site coordinator to document the following: <ul style="list-style-type: none"> <li>• Any issues related to drug assignment</li> <li>• Vital status assessment</li> <li>• Medication adherence</li> <li>• Hospitalization and respiratory infection assessment”</li> </ul>            |
| 8.3 | “ <b>Three (3) month (+/-7 days) Local Laboratory test for co-trimoxazole assigned subjects</b><br>Approximately 3 months after enrollment, subjects assigned to the co-trimoxazole arm of antimicrobial therapy will return to the enrolling site or at a local laboratory to have 8.5ml of blood drawn for complete blood count, electrolytes, renal function, and liver | Updated to: “ <b>Three (3) month lab for antimicrobial assigned subjects ONLY</b><br>Approximately 3 months (visit window of 3 months +/- 7 days) after enrollment, subjects assigned to the antimicrobial therapy arm will return to the enrolling site or a local laboratory for the following: <ul style="list-style-type: none"> <li>• Blood draw for the following safety labs (<b>Described in</b></li> </ul>                                         |

|     |                                                                                                                                                                                                                                                                                                                                                                                                                                                                                                                                                                                                                                                                                                   |                                                                                                                                                                                                                                                                                                                                                                                                                                                                                                                                                                                                                                                                                                                                                                                                                                                                                     |
|-----|---------------------------------------------------------------------------------------------------------------------------------------------------------------------------------------------------------------------------------------------------------------------------------------------------------------------------------------------------------------------------------------------------------------------------------------------------------------------------------------------------------------------------------------------------------------------------------------------------------------------------------------------------------------------------------------------------|-------------------------------------------------------------------------------------------------------------------------------------------------------------------------------------------------------------------------------------------------------------------------------------------------------------------------------------------------------------------------------------------------------------------------------------------------------------------------------------------------------------------------------------------------------------------------------------------------------------------------------------------------------------------------------------------------------------------------------------------------------------------------------------------------------------------------------------------------------------------------------------|
|     | <p>function tests. If the subject has had a recent laboratory value obtained for clinical purposes, the subject should submit those test results to the site or the site may obtain them directly. If the subject has not had a recent laboratory test, the subject should return to the site for the blood draw.”</p>                                                                                                                                                                                                                                                                                                                                                                            | <p><b>Appendix B):</b></p> <ul style="list-style-type: none"> <li>○ Chemistry panel and liver function tests– defined as minimum of sodium, potassium, chloride, bicarbonate, BUN, and creatinine, total bilirubin, direct bilirubin, alkaline phosphatase, ALT, and AST</li> <li>○ Complete blood count (CBC)”</li> </ul>                                                                                                                                                                                                                                                                                                                                                                                                                                                                                                                                                          |
| 8.4 | <p><b>“Six (6) month (+/-7 days) Local Laboratory test for co-trimoxazole assigned subjects</b><br/> Approximately 6 months after enrollment, subjects assigned to the co-trimoxazole arm of antimicrobial therapy will return to the enrolling site or at a local laboratory to have 8.5ml of blood drawn for complete blood count, electrolytes, renal function, and liver function tests.. If the subject has had a recent laboratory value obtained for clinical purposes, the subject should submit those test results to the site or the site may obtain them directly. If the subject has not had a recent laboratory test, the subject should return to the site for the blood draw.”</p> | <p>Updated to: <b>“Six (6) month lab for antimicrobial assigned subjects <u>ONLY</u></b><br/> Approximately 6 months (visit window of 6 months +/- 7 days) after enrollment, subjects assigned to the antimicrobial therapy arm will return to the enrolling site or a local laboratory for the following:</p> <ul style="list-style-type: none"> <li>● Blood drawn for the following safety labs (<b>Described in Appendix B):</b> <ul style="list-style-type: none"> <li>○ Chemistry panel and liver function tests– defined as minimum of sodium, potassium, chloride, bicarbonate, BUN, and creatinine, total bilirubin, direct bilirubin, alkaline phosphatase, ALT, and AST</li> <li>○ Complete blood count (CBC)</li> </ul> </li> <li>● Vital status Assessment</li> <li>● Medication adherence</li> <li>● Hospitalization and respiratory infection information”</li> </ul> |
| 8.5 | <p><b>“Six (6) month (+/-4 weeks) phone contact</b></p>                                                                                                                                                                                                                                                                                                                                                                                                                                                                                                                                                                                                                                           | <p>Updated to: <b>“Six (6) month phone contact (for standard care</b></p>                                                                                                                                                                                                                                                                                                                                                                                                                                                                                                                                                                                                                                                                                                                                                                                                           |



|            |                                                                                                                                                                                                                                                                                                                                                                                                                                                                                                                                                                                                                                                                                                                                                  |                                                                                                                                                                                                                                                                                                                                                                                                                                                                                                                                                                                                                                                                                                                                                                                                                                                                                                                                                                                                                                                                     |
|------------|--------------------------------------------------------------------------------------------------------------------------------------------------------------------------------------------------------------------------------------------------------------------------------------------------------------------------------------------------------------------------------------------------------------------------------------------------------------------------------------------------------------------------------------------------------------------------------------------------------------------------------------------------------------------------------------------------------------------------------------------------|---------------------------------------------------------------------------------------------------------------------------------------------------------------------------------------------------------------------------------------------------------------------------------------------------------------------------------------------------------------------------------------------------------------------------------------------------------------------------------------------------------------------------------------------------------------------------------------------------------------------------------------------------------------------------------------------------------------------------------------------------------------------------------------------------------------------------------------------------------------------------------------------------------------------------------------------------------------------------------------------------------------------------------------------------------------------|
|            | <p>Approximately 6 months after enrollment, subjects will be contacted by the site coordinator to document vital status, medication adherence, and to capture additional hospitalization and respiratory infection information.”</p>                                                                                                                                                                                                                                                                                                                                                                                                                                                                                                             | <p><b>arm)</b><br/> Approximately 6 months (visit window of 6 months +/- 4 weeks) after enrollment, subjects randomized to the standard care arm <b>ONLY</b> will be contacted by the site coordinator to document the following:</p> <ul style="list-style-type: none"> <li>• Vital status assessment</li> <li>• Medication adherence</li> <li>• Hospitalization and respiratory infection information</li> </ul>                                                                                                                                                                                                                                                                                                                                                                                                                                                                                                                                                                                                                                                  |
| <p>8.6</p> | <p><b>“Twelve (12) month (+/-4 weeks) in-person visit</b><br/> Subjects will return to the enrolling site approximately 12 months after enrollment and will complete a follow up spirometry assessment and quality-of-life questionnaires. If a spirometry assessment is available within 30 days of the in-person visit it may be used as the study assessment. Otherwise the spirometry assessment should be conducted at the in-person visit. Subjects will have 8.5 cc of blood drawn for complete blood count, electrolytes, renal function, and liver function tests included, as well as 20 cc of blood drawn for genotype (10 cc) and gene expression (10cc). Buccal and fecal samples will also be obtained for microbial ecology.”</p> | <p>Updated to: <b>“Twelve (12) month in-person visit</b><br/> All subjects will return to the enrolling site approximately 12 months (visit window of 12 months +/- 4 weeks) after enrollment and will complete the following:</p> <ul style="list-style-type: none"> <li>• Quality-of-life questionnaires</li> <li>• Spirometry and DLCO assessment</li> </ul> <p>*If a spirometry (with DLCO) assessment is available within 90 days of the in-person visit it may be used as the study assessment. Otherwise the spirometry assessment with DLCO should be conducted at the in-person visit.</p> <ul style="list-style-type: none"> <li>• Blood draw for the following safety labs (<u>for antimicrobial arm only</u>): <ul style="list-style-type: none"> <li>○ Chemistry panel and liver function tests– defined as minimum of sodium, potassium, chloride, bicarbonate, BUN, and creatinine, total bilirubin, direct bilirubin, alkaline phosphatase, ALT, and AST</li> </ul> </li> <li>• Complete Blood Count (CBC) (<u>for antimicrobial arm</u></li> </ul> |

|     |                                                                                                                                                                                                                                                                                                                                                                                                                                                                       |                                                                                                                                                                                                                                                                                                                                                                                                                                                                                                                                                                                                                                                                                                                                                                                                                                                                                      |
|-----|-----------------------------------------------------------------------------------------------------------------------------------------------------------------------------------------------------------------------------------------------------------------------------------------------------------------------------------------------------------------------------------------------------------------------------------------------------------------------|--------------------------------------------------------------------------------------------------------------------------------------------------------------------------------------------------------------------------------------------------------------------------------------------------------------------------------------------------------------------------------------------------------------------------------------------------------------------------------------------------------------------------------------------------------------------------------------------------------------------------------------------------------------------------------------------------------------------------------------------------------------------------------------------------------------------------------------------------------------------------------------|
|     |                                                                                                                                                                                                                                                                                                                                                                                                                                                                       | <p><u>only</u>)</p> <ul style="list-style-type: none"> <li>• Blood draw for gene expression</li> <li>• Buccal and fecal samples collection for microbial ecology.”</li> </ul>                                                                                                                                                                                                                                                                                                                                                                                                                                                                                                                                                                                                                                                                                                        |
| 8.7 | <p><b>“Eighteen (18) month (+/-4 weeks) phone contact</b><br/>Approximately 18 months after enrollment, subjects will be contacted by the site coordinator to document vital status, medication adherence, and to capture additional hospitalization and respiratory infection information.”</p>                                                                                                                                                                      | <p>Updated to: <b>“Eighteen (18) month phone contact</b><br/>Approximately 18 months (visit window of 18 months +/- 4 weeks) after enrollment, all subjects will be contacted by the site coordinator to document the following:</p> <ul style="list-style-type: none"> <li>• Vital status</li> <li>• Medication adherence</li> <li>• Hospitalization and respiratory infection information”</li> </ul>                                                                                                                                                                                                                                                                                                                                                                                                                                                                              |
| 8.8 | <p><b>“Twenty-four (24) month (+/-4 weeks) in-person visit</b><br/>Subjects will return to the enrolling site approximately 24 months after enrollment and will complete the quality-of-life questionnaires.</p> <ul style="list-style-type: none"> <li>• For subjects assigned to Co-trimoxazole arm of antimicrobial therapy, a 8.5mL specimen of blood will be drawn for complete blood count, electrolytes, renal function, and liver function tests.”</li> </ul> | <p>Updated to: <b>“Twenty-four (24) month in-person visit</b><br/>All subjects will return to the enrolling site approximately 24 months (visit window of 24 months +/- 4 weeks) after enrollment and will complete the following:</p> <ul style="list-style-type: none"> <li>• Quality-of-life questionnaires</li> <li>• Spirometry and an DLCO assessment</li> </ul> <p>*If a spirometry (with DLCO) assessment is available within 90 days of the in-person visit it may be used as the study assessment. Otherwise the spirometry assessment with DLCO should be conducted at the in-person visit.</p> <ul style="list-style-type: none"> <li>• Blood draw for the following safety labs (<u>for antimicrobial arm only</u>): <ul style="list-style-type: none"> <li>○ Chemistry panel and liver function tests– defined as minimum of sodium, potassium,</li> </ul> </li> </ul> |

|      |                                                                                                                                                                                                                                                                                                    |                                                                                                                                                                                                                                                                                                                                                                                                                                                                                                                                                                                                    |
|------|----------------------------------------------------------------------------------------------------------------------------------------------------------------------------------------------------------------------------------------------------------------------------------------------------|----------------------------------------------------------------------------------------------------------------------------------------------------------------------------------------------------------------------------------------------------------------------------------------------------------------------------------------------------------------------------------------------------------------------------------------------------------------------------------------------------------------------------------------------------------------------------------------------------|
|      |                                                                                                                                                                                                                                                                                                    | <p>chloride, bicarbonate, BUN, and creatinine, total bilirubin, direct bilirubin, alkaline phosphatase, ALT, and AST</p> <ul style="list-style-type: none"> <li>• Complete Blood Count (CBC) (<u>for antimicrobial arm only</u>)</li> <li>• Blood draw for gene expression</li> <li>• Buccal and fecal samples collection for microbial ecology.”</li> </ul>                                                                                                                                                                                                                                       |
| 8.9  | <p><b>“Thirty (30) month (+/-4 weeks) phone contact</b><br/>Approximately 30 months after enrollment, subjects will be contacted by the site coordinator to document vital status, medication adherence, and to capture additional hospitalization and respiratory infection information.”</p>     | <p>Updated to: <b>“Thirty (30) month phone contact</b><br/>Approximately 30 months (visit window of 30 months +/- 4 weeks) after enrollment, subjects will be contacted by the site coordinator to document the following:</p> <ul style="list-style-type: none"> <li>• Vital status</li> <li>• Medication adherence</li> <li>• Hospitalization and respiratory infection information”</li> </ul>                                                                                                                                                                                                  |
| 8.10 | <p><b>“Thirty-six (36) month (+/-4 weeks) phone contact</b><br/>Approximately 36 months after enrollment, subjects will be contacted by the site coordinator to document vital status, medication adherence, and to capture additional hospitalization and respiratory infection information.”</p> | <p>Updated to: <b>“Thirty-six (36) month phone contact</b><br/>Approximately 36 months (visit window of 36 months +/- 4 weeks) after enrollment, subjects will be contacted by the site coordinator to document the following:</p> <ul style="list-style-type: none"> <li>• Vital status</li> <li>• Medication adherence</li> <li>• Hospitalization and respiratory infection information</li> </ul> <p>Participants randomized to the antimicrobial arm who are still taking study drug at this visit should consult with their treating pulmonologist about continuing any prescriptions for</p> |

|      |                                                                                                                                                                                                                                                                                                                                                             |                                                                                                                                                                                                                                                                                                                                                                                                                                                                                                                                                                                                                                            |
|------|-------------------------------------------------------------------------------------------------------------------------------------------------------------------------------------------------------------------------------------------------------------------------------------------------------------------------------------------------------------|--------------------------------------------------------------------------------------------------------------------------------------------------------------------------------------------------------------------------------------------------------------------------------------------------------------------------------------------------------------------------------------------------------------------------------------------------------------------------------------------------------------------------------------------------------------------------------------------------------------------------------------------|
|      |                                                                                                                                                                                                                                                                                                                                                             | antimicrobial therapies, as prescription drug voucher coverage will cease after completion of the 36 month phone contact. Data collection for study purposes will cease after completion of the 36-month phone contact.”                                                                                                                                                                                                                                                                                                                                                                                                                   |
| 10.4 | “Adverse events are not being collected for the CleanUP-IPF trial.”                                                                                                                                                                                                                                                                                         | <p>Updated to: “Adverse events (AEs) <u>of special interest ONLY</u> will be collected for the CleanUP-IPF trial. These AEs include:</p> <ul style="list-style-type: none"> <li>• Arrhythmia</li> <li>• Vomiting</li> <li>• Diarrhea</li> <li>• Rash</li> <li>• Hyperkalemia</li> </ul> <p>These adverse events of special interest will be collected via data entry into the eCRF within the electronic data capture system. Start and stop dates will also be collected for these events, as well as any concomitant medications prescribed (with start and stop dates of the concomitant medication) for treatment of such events.”</p> |
| 10.5 | <p>“For this study, all SAEs occurring from the time of enrollment visit to 30 days post-study completion visit...”</p> <p>“If no events have occurred, the DCRI Medical Monitor and Clinical Operations team and NEMO will notify the DSMB chair as such.”</p> <p>“Events related to worsening of IPF shall not be considered Serious Adverse Events.”</p> | <p>Updated to: ““For this study, all SAEs occurring from the time of drug administration to 30 days post-study completion visit...”</p> <p>“If no events have occurred, the DCRI Clinical Operations team will notify the NEMO, and NEMO will notify the DSMB chair as such.”</p> <p>Removed, “Events related to worsening of IPF shall not be considered Serious Adverse Events.”</p>                                                                                                                                                                                                                                                     |
| 12.5 | “Clinical centers will resolve data inconsistencies and errors and enter all corrections and changes into data management system.”                                                                                                                                                                                                                          | Updated to: “Clinical centers will resolve data inconsistencies and errors and enter all corrections and changes into data management system and will adhere to the data entry and                                                                                                                                                                                                                                                                                                                                                                                                                                                         |

|    |                                      |                                                                                                                                                                                                                              |
|----|--------------------------------------|------------------------------------------------------------------------------------------------------------------------------------------------------------------------------------------------------------------------------|
|    |                                      | query response timelines specified by the CleanUP-IPF PLG.”                                                                                                                                                                  |
| 15 | Appendix A – Schedule of Assessments | Updated Appendix A – Schedule of Assessments to clarify labs being collected at visits, allow for previously collected labs and PFTs to be used (where applicable), and corrections to footers for Schedule of Assessments   |
| 16 | N/A                                  | Added Appendix B – CleanUP-IPF Laboratory Schedule table, to clarify labs being collected at visits, total amounts of samples collected, and provide clear reference for which labs are collected for each randomization arm |
