# Supplementary material
Source: PubMed Central journal article supplement (PMC8114133)
Supplement: jama-e214956-s002.pdf [file jama-e214956-s002.pdf]

1  
2  
3

**Supplemental Appendix 2**  
**Statistical Analysis Plan**

4  
5  
6  
7  
8  
9  
10  
11  
12  
13  
14  
15  
16  
17  
18  
19  
20

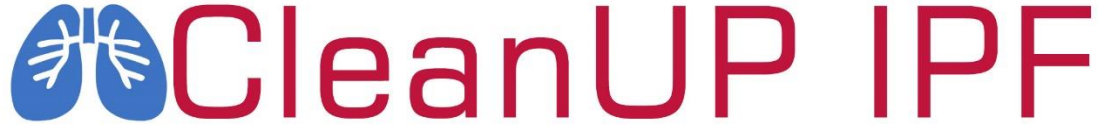

Study of Co-trimoxazole or Doxycycline and their Impact on Clinical Outcomes Using Pragmatic Design in Idiopathic Pulmonary Fibrosis

# Statistical Analysis Plan

Date: 28NOV2016

|    |                                                  |           |
|----|--------------------------------------------------|-----------|
| 21 | Table of Contents                                |           |
| 22 | <b>I. Overview</b>                               | <b>4</b>  |
| 23 | <b>II. Study Design</b>                          | <b>4</b>  |
| 24 | Randomization                                    | 4         |
| 25 | Data Sources                                     | 4         |
| 26 | <b>III. Analysis Population and Missing Data</b> | <b>4</b>  |
| 27 | <b>IV. General Methodology</b>                   | <b>5</b>  |
| 28 | <b>V. Primary Endpoint</b>                       | <b>5</b>  |
| 29 | <b>VI. Secondary Endpoints</b>                   | <b>5</b>  |
| 30 | <b>VII. Endpoint Descriptions</b>                | <b>6</b>  |
| 31 | Primary Endpoint                                 | 6         |
| 32 | <b>VIII. Secondary Endpoint Descriptions</b>     | <b>7</b>  |
| 33 | Secondary Endpoint #1                            | 7         |
| 34 | Secondary Endpoint #2                            | 8         |
| 35 | Secondary Endpoint #3                            | 8         |
| 36 | Secondary Endpoint #4                            | 9         |
| 37 | Secondary Endpoint #5                            | 10        |
| 38 | Secondary Endpoint #6                            | 10        |
| 39 | Secondary Endpoint #7                            | 11        |
| 40 | Secondary Endpoint #8                            | 12        |
| 41 | Secondary Endpoint #9                            | 12        |
| 42 | Secondary Endpoint #10                           | 13        |
| 43 | Secondary Endpoint #11                           | 14        |
| 44 | Secondary Endpoint #12                           | 15        |
| 45 | Secondary Endpoint #13                           | 15        |
| 46 | <b>IX. Safety endpoints</b>                      | <b>16</b> |
| 47 | Serious adverse events                           | 16        |
| 48 | Concomitant Medication                           | 16        |
| 49 | <b>X. Trial conduct</b>                          | <b>17</b> |
| 50 | Compliance                                       | 17        |
| 51 | Therapy crossover                                | 17        |
| 52 | <b>XI. Exploratory analyses</b>                  | <b>17</b> |
| 53 | Six minute walk test                             | 17        |
| 54 | <b>XII. Interim Analyses</b>                     | <b>18</b> |
| 55 | <b>XIII. Subgroup of Interest</b>                | <b>18</b> |
| 56 | <b>XIV. References</b>                           | <b>19</b> |
| 57 | <b>XV. Tables/Listing/Graph Mock-ups</b>         | <b>19</b> |

58

## 59 I. Overview

---

60 CleanUP-IPF is a randomized, unblinded, multi-center clinical trial of patients with a  
61 diagnosis of idiopathic pulmonary fibrosis (IPF). A total of approximately 500 patients  
62 will be enrolled in the trial. Eligible patients will be randomized to the following  
63 treatment strategies:

- 64 • Standard care
- 65 • Standard care + oral antimicrobial therapy

66  
67 Patients randomized to receive antimicrobial therapy will be given co-trimoxazole  
68 unless they have an allergy, contraindication to co-trimoxazole, renal insufficiency  
69 (GFR < 30 ml), are hyperkalemic (potassium > 5 mEq/L), or are concomitantly taking  
70 an angiotensin converting enzyme inhibitor (ACEI), angiotensin receptor blocker (ARB),  
71 or potassium sparing diuretic in which case they will receive doxycycline.  
72

## 73 II. Study Design

---

### 74 **Randomization**

75  
76 Eligible patients will be randomized 1:1 to either receive or not receive a prescription  
77 drug voucher for oral antimicrobial therapy in the form of one double strength 160mg  
78 trimethoprim/800mg sulfamethoxazole (double strength co-trimoxazole) twice daily  
79 plus folic acid 5 mg daily OR doxycycline 100mg once daily if weight < 50 kilograms or  
80 100mg twice daily if weight > 50 kilograms.

81

### 82 **Data Sources**

83

84 A database of case report form and biomarker core lab data will be created in  
85 eClinicalOS (eCOS), and the data then transferred to SAS for analysis. The randomized  
86 treatment assignment will be provided through data collected by the eCOS system.  
87

## 88 III. Analysis Population and Missing Data

---

89 The primary analysis will be based on intention to treat. All randomized patients will  
90 be included in the analysis population for assessing the primary and secondary  
91 endpoints. Extensive efforts being made in connection with the clinical sites to ensure  
92 data quality and completeness, it is expected that exclusion of patients for any  
93 endpoint analysis will be minimal.  
94

95 For the primary endpoint patients without any observed non-elective, respiratory  
96 hospitalization or all-cause mortality will be censored at their last visit or lung  
97 transplantation. For the adjustment variables in the primary model the imputation  
98 method will be dictated by the amount of missingness. If all the adjustment variables  
99 have a missing data rate of 2% or below (approximately 10 or less out of 500) then a  
100 simple imputation method will be implemented. If any one of the adjustment variables  
101 has a missing data rate over 2% (approximately more than 10 out of 500) then  
102 multiple imputation method will be implemented. For the simple approach categorical

103 adjustment variables will be imputed to the mode and continuous adjustment  
 104 variables will be imputed to the median value. For the multiple imputation the full  
 105 conditional specification method (FCS) method will be used and assume an arbitrary  
 106 missing data pattern [Berglund and Heeringa 2014]. The multiple imputation scenario  
 107 (20 planned iterations) will be constructed which includes the treatment group  
 108 indicator variable and the adjustment variables planned for the primary model.  
 109

## 110 IV. General Methodology

111 Definition of Statistical Significance: The statistical plan will test non-directional  
 112 hypotheses, i.e., all tests will be 2-sided. The level of significance for all efficacy and  
 113 safety analyses will be 0.05.

114 Statistical Tests: For situations where one observation per patient is observed, (e.g.  
 115 safety comparisons at individual time points), a general analysis convention will be  
 116 used unless otherwise specified. For continuous and ordinal variables, treatment  
 117 group differences will be tested using the Wilcoxon rank-sum test for two groups and  
 118 Kruskal-Wallis one-way analysis of variance for comparisons of more than two groups.  
 119 For censored data, like time to event, treatment group differences will be tested using  
 120 the log rank test. For discrete variables, treatment group differences will be tested  
 121 using the chi-square test. In the situation of low cell counts the treatment group  
 122 differences will be tested using Fisher's exact method.

123 Descriptive Statistics: For continuous and ordinal variables the number of  
 124 observations, number of missing values, mean, standard deviation, median, twenty-  
 125 fifth percentile, and seventy-fifth percentile will be given. For binary (e.g. yes/no),  
 126 categorical, and/or ordinal variables a simple count and percent will be provided.  
 127 Other statistics may be considered if necessary.

128 Descriptive Plots: Descriptive plots may replace or produced in addition to descriptive  
 129 statistics if deemed appropriate. If deemed necessary plots of descriptive statistics  
 130 such as spaghetti, mosaic, box, cumulative distribution, and loess curves will be  
 131 provided.

132 Study Listings: Study data will be listed by treatment group, visit if applicable, and  
 133 patient where appropriate.

134 Software and Validation Procedures: All data presented in interim and final analyses  
 135 will be generated and validated under the guidance of the DCRI Clinical Trials  
 136 Statistical SOPs.  
 137

## 138 V. Primary Endpoint

139 The primary endpoint of this study will be the comparison of "Standard care + oral  
 140 antimicrobial therapy" and "Standard care" for the time to first non-elective,  
 141 respiratory hospitalization or all-cause mortality.  
 142

## 143 VI. Secondary Endpoints

144 Secondary goals of this study are to assess differences between treatment groups for  
 145 the following:

- 146 1. Time to death from any cause
- 147 2. Time to first non-elective respiratory hospitalization
- 148 3. Time to first non-elective all-cause hospitalization
- 149 4. Total number of non-elective respiratory hospitalizations
- 150 5. Total number of non-elective all-cause hospitalizations

- 151 6. Change in FVC from randomization to 12 months  
 152 7. Change in DLCO from randomization to 12 months  
 153 8. Total number of respiratory infections  
 154 9. Change in UCSD-Shortness of Breath Questionnaire from randomization to 12 months  
 155 10. Change in Fatigue Severity Scale score from randomization to 12 months  
 156 11. Change in Leicester Cough Questionnaire score from randomization to 12 months  
 157 12. Change in EQ-5D score and SF-12 score from randomization to 12 months  
 158 13. Change in ICEpop CAPability measure for Older people (ICECAP-O) score from  
 159 randomization to 12 months  
 160

## 161 VII. Endpoint Descriptions

---

### 162 **Primary Endpoint**

163  
 164 Endpoint Description: Time to first non-elective, respiratory hospitalization or all-  
 165 cause mortality.  
 166

167 Response Variable Definition: Time to first respiratory hospitalization or all-cause  
 168 mortality (primary endpoint) will be defined as the time to first observed event  
 169 respiratory hospitalization or all-cause mortality. All patients will have some  
 170 information regarding mortality and last visit of follow-up. Patients without any  
 171 observed respiratory hospitalization or death event at the time of analysis will be  
 172 censored at their last visit or lung transplantation. The respiratory hospitalizations  
 173 will be reviewed and adjudicated by a clinical events committee (CEC).  
 174

175 Additional Covariates: Age, sex, baseline DLCO, baseline FVC, use of NAC at  
 176 enrollment, use of standard of care medications at enrollment, and choice of  
 177 antimicrobial agent prior to randomization. Note that the baseline DLCO and baseline  
 178 FVC will be added to regression models using the % predicted versions for all  
 179 endpoints.  
 180

181 Handling of Dropouts and Missing Data:

182 The censoring mechanism is assumed to be non-informative. Supportive analyses will  
 183 be performed to assess the impact of a potential informative censoring.  
 184

185 Diagnostic tests: The additional continuous covariates to be used in the primary  
 186 analysis model will be assessed for major departures from linearity by inspection of  
 187 restricted cubic spline plots. If a departure is observed then a suitable transformation  
 188 will be explored. In addition the proportional hazard assumptions will be explored by  
 189 inspection of Martingale residuals plots for all model covariates. If a major departure  
 190 is observed then the variable will added to the model as a stratification variable.  
 191

192 Statistical Tests: The Cox proportional hazards regression model will be used to  
 193 estimate outcome differences between the two treatment arms: “Standard care + oral  
 194 antimicrobial therapy” and “Standard care”. The outcome is the time to first non-  
 195 elective, respiratory hospitalization or all-cause mortality with model terms for  
 196 treatment arm, baseline measurement, and covariates. Hazard ratios and 95%  
 197 confidence intervals will summarize the differences between treatment arms.  
 198

199 Interpretation of Results: For Cox regression models a hazard ratio below 1.00 will  
 200 indicate a reduction in events for “Standard care + oral antimicrobial therapy” arm. A

201 hazard ratio above 1.00 will indicate increase in events for “Standard care + oral  
202 antimicrobial therapy” arm.

203  
204 Alternative Analysis: To explore therapy crossovers an alternative analysis scenario  
205 will be constructed. Therapy crossover will be defined as patients assigned “Standard  
206 care” and receiving after randomization “oral antimicrobial therapy”. The previous  
207 presented primary analysis model will be used and modified. Specifically the  
208 response variable definition for the “Standard care” assigned patients (with crossover)  
209 will be changed such that the time to event and event indicator variables will be  
210 censored at the time of therapy crossover. The same statistical model and  
211 interpretation will be used as the primary analysis.

212

## 213 VIII. Secondary Endpoint Descriptions

---

### 214 **Secondary Endpoint #1**

215 Endpoint Description: Time to death from any cause.

216

217 Response Variable Definition: Time to death will be defined as the time to all-cause  
218 mortality. All patients will have some information regarding mortality and last visit of  
219 follow-up. Patients without any observed death at the time of analysis will be censored  
220 at their last visit or lung transplantation.

221

222 Additional Covariates: Age, sex, baseline DLCO, baseline FVC, use of NAC at  
223 enrollment, use of standard of care medications at enrollment, and choice of  
224 antimicrobial agent prior to randomization.

225

226 Handling of Dropouts and Missing Data: The censoring mechanism is assumed to be  
227 non-informative. Supportive analyses will be performed to assess the impact of a  
228 potential informative censoring.

229

230 Diagnostic tests: The additional continuous covariates to be used in the primary  
231 analysis model will be assessed for major departures from linearity by inspection of  
232 restricted cubic spline plots. If a departure is observed then a suitable transformation  
233 will be explored. In addition the proportional hazard assumptions will be explored by  
234 inspection of Martingale residuals plots. If a major departure is observed then the  
235 variable will be added to the model as a stratification variable.

236

237 Statistical Tests: The Cox proportional hazards regression model will be used to  
238 estimate outcome differences between the two treatment arms: “Standard care + oral  
239 antimicrobial therapy” and “Standard care”. The outcome is the time to death from  
240 any cause with model terms for treatment arm, baseline measurement, and covariates.  
241 Hazard ratios and 95% confidence intervals will summarize the differences between  
242 treatment arms.

243

244 Interpretation of Results: For Cox regression models a hazard ratio below 1 will  
245 indicate a reduction in events for “Standard care + oral antimicrobial therapy” arm. A  
246 hazard ratio above 1.00 will indicate increase in events for “Standard care + oral  
247 antimicrobial therapy” arm.

248

## 249 **Secondary Endpoint #2**

250 Endpoint Description: Time to first non-elective respiratory hospitalization

251  
252 Response Variable Definition: Time to first non-elective respiratory hospitalization will  
253 be defined as the time to first non-elective respiratory hospitalization. The  
254 hospitalizations will be reviewed and adjudicated by a CEC as non-elective respiratory  
255 hospitalizations. All patients will have some information regarding mortality and last  
256 visit of follow-up. Patients without any observed event at the time of analysis will be  
257 censored at their last visit, death, or lung transplantation.

258  
259 Additional Covariates: Age, sex, baseline DLCO, baseline FVC, use of NAC at  
260 enrollment, use of standard of care medications at enrollment, and choice of  
261 antimicrobial agent prior to randomization.

262  
263 Handling of Dropouts and Missing Data: The censoring mechanism is assumed to be  
264 non-informative. Supportive analyses will be performed to assess the impact of a  
265 potential informative censoring.

266  
267 Diagnostic tests: The additional continuous covariates to be used in the primary  
268 analysis model will be assessed for major departures from linearity by inspection of  
269 restricted cubic spline plots. If a departure is observed then a suitable transformation  
270 will be explored. In addition the proportional hazard assumptions will be explored by  
271 inspection of Martingale residuals plots. If a major departure is observed then the  
272 variable will added to the model as a stratification variable.

273  
274 Statistical Tests: The Cox proportional hazards regression model will be used to  
275 estimate outcome differences between the two treatment arms: “Standard care + oral  
276 antimicrobial therapy” and “Standard care”. The outcome is the time to first non-  
277 elective respiratory hospitalization with model terms for treatment arm, baseline  
278 measurement, and covariates. Hazard ratios and 95% confidence intervals will  
279 summarize the differences between treatment arms.

280  
281 Interpretation of Results: For Cox regression models a hazard ratio below 1.00 will  
282 indicate a reduction in events for “Standard care + oral antimicrobial therapy” arm. A  
283 hazard ratio above 1.00 will indicate increase in events for “Standard care + oral  
284 antimicrobial therapy” arm.

## 285 **Secondary Endpoint #3**

286 Endpoint Description: Time to first non-elective all-cause hospitalization

287  
288  
289 Response Variable Definition: Time to first non-elective hospitalization will be defined  
290 as the time to first non-elective hospitalization. The hospitalizations will be reviewed  
291 and adjudicated by a CEC as non-elective all-cause hospitalizations. All patients will  
292 have some information regarding mortality and last visit of follow-up. Patients without  
293 any observed event at the time of analysis will be censored at their last visit, death, or  
294 lung transplantation.

295  
296 Additional Covariates: Age, sex, baseline DLCO, baseline FVC, use of NAC at  
297 enrollment, use of standard of care medications at enrollment, and choice of  
298 antimicrobial agent prior to randomization.



299  
 300 Handling of Dropouts and Missing Data: The censoring mechanism is assumed to be  
 301 non-informative. Supportive analyses will be performed to assess the impact of a  
 302 potential informative censoring.

303  
 304 Diagnostic tests: The additional continuous covariates to be used in the primary  
 305 analysis model will be assessed for major departures from linearity by inspection of  
 306 restricted cubic spline plots. If a departure is observed then a suitable transformation  
 307 will be explored. In addition the proportional hazard assumptions will be explored by  
 308 inspection of Martingale residuals plots. If a major departure is observed then the  
 309 variable will added to the model as a stratification variable.

310  
 311 Statistical Tests: The Cox proportional hazards regression model will be used to  
 312 estimate outcome differences between the two treatment arms: “Standard care + oral  
 313 antimicrobial therapy” and “Standard care”. The outcome is the time to first non-  
 314 elective all-cause hospitalization with model terms for treatment arm, baseline  
 315 measurement, and covariates. Hazard ratios and 95% confidence intervals will  
 316 summarize the differences between treatment arms.

317  
 318 Interpretation of Results: For Cox regression models a hazard ratio below 1.00 will  
 319 indicate a reduction in events for “Standard care + oral antimicrobial therapy” arm. A  
 320 hazard ratio above 1.00 will indicate increase in events for “Standard care + oral  
 321 antimicrobial therapy” arm.

322

#### 323 **Secondary Endpoint #4**

324 Endpoint Description: Total number of non-elective respiratory hospitalizations

325

326 Response Variable Definition: The hospitalizations will be reviewed and adjudicated by  
 327 a clinical events committee (CEC) as non-elective respiratory hospitalizations.

328

329 Additional Covariates: Age, sex, baseline DLCO, baseline FVC, use of NAC at  
 330 enrollment, and choice of antimicrobial agent prior to randomization.

331

332 Handling of Dropouts and Missing Data: All patients will have some information  
 333 regarding mortality and last visit of follow-up. Lung transplantation will be additional  
 334 censoring variable in this analyses. The censoring mechanism is assumed to be non-  
 335 informative. Supportive analyses will be performed to assess the impact of a potential  
 336 informative censoring.

337

338 Diagnostic tests: The additional continuous covariates to be used in the primary  
 339 analysis model will be assessed for major departures from linearity by inspection  
 340 scatter plots with LOESS curves. If a departure is observed then a suitable  
 341 transformation will be explored. The validity of this model in terms of meeting  
 342 modeling assumptions will be assessed via standard modeling diagnostics and  
 343 goodness-of-fit measures.

344

345 Statistical Tests: A Poisson regression model will be used to estimate outcome ratio  
 346 between the two treatment arms: “Standard care + oral antimicrobial therapy” and  
 347 “Standard care”. The outcome is the total number of non-elective respiratory  
 348 hospitalizations with model terms for treatment arm, baseline measurement, and

349 covariates. Rates and 95% confidence intervals will summarize the differences  
350 between treatment arms.

351  
352 Interpretation of Results: For poisson regression models a ratio below 1.00 will  
353 indicate a reduction in events for “Standard care + oral antimicrobial therapy” arm. A  
354 hazard ratio above 1.00 will indicate increase in events for “Standard care + oral  
355 antimicrobial therapy” arm.

### 356 357 **Secondary Endpoint #5**

358 Endpoint Description: Total number of non-elective all-cause hospitalizations

359  
360 Response Variable Definition: The hospitalizations will be reviewed and adjudicated by  
361 a CEC as non-elective all-cause hospitalizations.

362  
363 Additional Covariates: Age, sex, baseline DLCO, baseline FVC, use of NAC at  
364 enrollment, use of standard of care medications at enrollment, and choice of  
365 antimicrobial agent prior to randomization.

366  
367 Handling of Dropouts and Missing Data: All patients will have some information  
368 regarding mortality and last visit of follow-up. Lung transplantation will be additional  
369 censoring variable in this analyses. The censoring mechanism is assumed to be non-  
370 informative. Supportive analyses will be performed to assess the impact of a potential  
371 informative censoring.

372  
373 Diagnostic tests: The additional continuous covariates to be used in the primary  
374 analysis model will be assessed for major departures from linearity by inspection  
375 scatter plots with LOESS curves. If a departure is observed then a suitable  
376 transformation will be explored. The validity of this model in terms of meeting  
377 modeling assumptions will be assessed via standard modeling diagnostics and  
378 goodness-of-fit measures.

379  
380 Statistical Tests: The Poisson regression model will be used to estimate outcome ratio  
381 between the two treatment arms: “Standard care + oral antimicrobial therapy” and  
382 “Standard care”. The outcome is the total number of non-elective all-cause  
383 hospitalizations with model terms for treatment arm, baseline measurement, and  
384 covariates. Rates and 95% confidence intervals will summarize the differences  
385 between treatment arms.

386  
387 Interpretation of Results: For Poisson regression models a ratio below 1.00 will  
388 indicate a reduction in events for “Standard care + oral antimicrobial therapy” arm. A  
389 ratio above 1.00 will indicate increase in events for “Standard care + oral antimicrobial  
390 therapy” arm.

### 391 392 **Secondary Endpoint #6**

393 Endpoint Description: Change in FVC (L) from randomization to 12 months

394  
395 Response Variable Definition: The FVC data will be collected at baseline and 12  
396 months. The change from baseline will be calculated for the 12 month values by  
397 subtracting the baseline result.

398

399 Additional Covariates: Age, sex, baseline DLCO, baseline FVC, use of NAC at  
400 enrollment, use of standard of care medications at enrollment, and choice of  
401 antimicrobial agent prior to randomization.

402  
403 Handling of Dropouts and Missing Data: All patients will have some information  
404 regarding mortality and last visit of follow-up. Lung transplantation will be additional  
405 censoring variable in this analyses. The censoring mechanism is assumed to be non-  
406 informative. Supportive analyses will be performed to assess the impact of a potential  
407 informative censoring.

408  
409 Diagnostic tests: The additional continuous covariates to be used in the primary  
410 analysis model will be assessed for major departures from linearity by inspection  
411 scatter plots with LOESS curves. If a departure is observed then a suitable  
412 transformation will be explored. The validity of this model in terms of meeting  
413 modeling assumptions will be assessed via standard modeling diagnostics and  
414 goodness-of-fit measures.

415  
416 Statistical Tests: The linear regression model will be used to estimate outcome  
417 differences between the two treatment arms: “Standard care + oral antimicrobial  
418 therapy” and “Standard care”. The outcome is the measured result at 12 months with  
419 model terms for treatment arm, baseline measurement, and covariates. Descriptive  
420 statistics will be calculated at baseline and 12 months by treatment group.

421  
422 Interpretation of Results: For linear models a difference below 0.00 will indicate a  
423 reduction in score for “Standard care + oral antimicrobial therapy” arm. A difference  
424 above 0.00 will indicate increase in score for “Standard care + oral antimicrobial  
425 therapy” arm.

426

### 427 **Secondary Endpoint #7**

428 Endpoint Description: Change in DLCO from randomization to 12 months

429

430 Response Variable Definition: The DLCO data will be collected at baseline and 12  
431 months. The change from baseline will be calculated for the 12 month values by  
432 subtracting the baseline result.

433

434 Additional Covariates: Age, sex, baseline DLCO, baseline FVC, use of NAC at  
435 enrollment, use of standard of care medications at enrollment, and choice of  
436 antimicrobial agent prior to randomization.

437

438 Handling of Dropouts and Missing Data:

439 All patients will have some information regarding mortality and last visit of follow-up.  
440 Lung transplantation will be additional censoring variable in this analyses. The  
441 censoring mechanism is assumed to be non-informative. Supportive analyses will be  
442 performed to assess the impact of a potential informative censoring.

443

444 Diagnostic tests: The additional continuous covariates to be used in the primary  
445 analysis model will be assessed for major departures from linearity by inspection  
446 scatter plots with LOESS curves. If a departure is observed then a suitable  
447 transformation will be explored. The validity of this model in terms of meeting

448 modeling assumptions will be assessed via standard modeling diagnostics and  
449 goodness-of-fit measures.

450

451 Statistical Tests: The linear regression model will be used to estimate outcome  
452 differences between the two treatment arms: “Standard care + oral antimicrobial  
453 therapy” and “Standard care”. The outcome is the measured result at 12 months with  
454 model terms for treatment arm, baseline measurement, and covariates. Descriptive  
455 statistics will be calculated at baseline and 12 months by treatment group.

456

457 Interpretation of Results: For linear models a difference below 0.00 will indicate a  
458 reduction in score for “Standard care + oral antimicrobial therapy” arm. A difference  
459 above 0.00 will indicate increase in score for “Standard care + oral antimicrobial  
460 therapy” arm.

461

### 462 **Secondary Endpoint #8**

463 Endpoint Description: Total number of respiratory infections

464

465 Response Variable Definition: all lower respiratory tract infection(s) treated with  
466 antibiotic treatment will be collected in follow-up.

467

468 Additional Covariates: Age, sex, baseline DLCO, baseline FVC, use of NAC at  
469 enrollment, use of standard of care medications at enrollment, and choice of  
470 antimicrobial agent prior to randomization.

471

472 Handling of Dropouts and Missing Data: The censoring mechanism is assumed to be  
473 non-informative. Supportive analyses will be performed to assess the impact of a  
474 potential informative censoring.

475

476 Diagnostic tests: The additional continuous covariates to be used in the primary  
477 analysis model will be assessed for major departures from linearity by inspection  
478 scatter plots with LOESS curves. If a departure is observed then a suitable  
479 transformation will be explored. The validity of this model in terms of meeting  
480 modeling assumptions will be assessed via standard modeling diagnostics and  
481 goodness-of-fit measures.

482

483 Statistical Tests: A Poisson regression model will be used to estimate outcome ratio  
484 between the two treatment arms: “Standard care + oral antimicrobial therapy” and  
485 “Standard care”. The outcome is the total number of respiratory infections with model  
486 terms for treatment arm, baseline measurement, and covariates. Rates and 95%  
487 confidence intervals will summarize the differences between treatment arms.

488

489 Interpretation of Results: For Poisson regression models a ratio below 1.00 will  
490 indicate a reduction in events for “Standard care + oral antimicrobial therapy” arm. A  
491 ratio above 1.00 will indicate increase in events for “Standard care + oral antimicrobial  
492 therapy” arm.

493

### 494 **Secondary Endpoint #9**

495 Endpoint Description: Change in UCSD-Shortness of Breath Questionnaire from  
496 randomization to 12 months

497

498 Response Variable Definition: The UCSD-Shortness of Breath Questionnaire data will  
499 be collected at baseline and 12 months. For the collect questionnaire data the UCSD-  
500 Shortness of Breath score will be calculated. The change from baseline will be  
501 calculated for the 12 month values by subtracting the baseline result.

502

503 Additional Covariates: Age, sex, baseline DLCO, baseline FVC, use of NAC at  
504 enrollment, use of standard of care medications at enrollment, and choice of  
505 antimicrobial agent prior to randomization.

506

507 Handling of Dropouts and Missing Data:

508 The censoring mechanism is assumed to be non-informative. Supportive analyses will  
509 be performed to assess the impact of a potential informative censoring.

510

511 Diagnostic tests: The additional continuous covariates to be used in the primary  
512 analysis model will be assessed for major departures from linearity by inspection  
513 scatter plots with LOESS curves. If a departure is observed then a suitable  
514 transformation will be explored. The validity of this model in terms of meeting  
515 modeling assumptions will be assessed via standard modeling diagnostics and  
516 goodness-of-fit measures.

517

518 Statistical Tests: The linear regression model will be used to estimate outcome  
519 differences between the two treatment arms: “Standard care + oral antimicrobial  
520 therapy” and “Standard care”. The outcome is the measured result at 12 months with  
521 model terms for treatment arm, baseline measurement, and covariates. Descriptive  
522 statistics will be calculated at baseline and 12 months by treatment group.

523

524 Interpretation of Results: For linear models a difference below 0.00 will indicate a  
525 reduction in score for “Standard care + oral antimicrobial therapy” arm. A difference  
526 above 0.00 will indicate increase in score for “Standard care + oral antimicrobial  
527 therapy” arm.

528

### 529 **Secondary Endpoint #10**

530 Endpoint Description: Change in Fatigue Severity Scale score from randomization to  
531 12 months

532

533 Response Variable Definition: The Fatigue Severity Scale Questionnaire data will be  
534 collected at baseline and 12 months. For the collect questionnaire data the Fatigue  
535 Severity Scale score will be calculated. The change from baseline will be calculated for  
536 the 12 month values by subtracting the baseline result.

537

538 Additional Covariates: Age, sex, baseline DLCO, baseline FVC, use of NAC at  
539 enrollment, use of standard of care medications at enrollment, and choice of  
540 antimicrobial agent prior to randomization.

541

542 Handling of Dropouts and Missing Data: The censoring mechanism is assumed to be  
543 non-informative. Supportive analyses will be performed to assess the impact of a  
544 potential informative censoring.

545

546 Diagnostic tests: The additional continuous covariates to be used in the primary  
547 analysis model will be assessed for major departures from linearity by inspection

548 scatter plots with LOESS curves. If a departure is observed then a suitable  
549 transformation will be explored. The validity of this model in terms of meeting  
550 modeling assumptions will be assessed via standard modeling diagnostics and  
551 goodness-of-fit measures.

552  
553 Statistical Tests: The linear regression model will be used to estimate outcome  
554 differences between the two treatment arms: “Standard care + oral antimicrobial  
555 therapy” and “Standard care”. The outcome is the measured result at 12 months with  
556 model terms for treatment arm, baseline measurement, and covariates. Descriptive  
557 statistics will be calculated at baseline and 12 months by treatment group.

558  
559 Interpretation of Results: For linear models a difference below 0.00 will indicate a  
560 reduction in score for “Standard care + oral antimicrobial therapy” arm. A difference  
561 above 0.00 will indicate increase in score for “Standard care + oral antimicrobial  
562 therapy” arm.

### 563 **Secondary Endpoint #11**

564 Endpoint Description: Change in Leicester Cough Questionnaire score from  
565 randomization to 12 months

566  
567 Response Variable Definition: The Leicester Cough Questionnaire data will be collected  
568 at baseline and 12 months. For the collect questionnaire data the Leicester Cough  
569 Questionnaire score will be calculated. The change from baseline will be calculated for  
570 the 12 month values by subtracting the baseline result.

571  
572 Additional Covariates: Age, sex, baseline DLCO, baseline FVC, use of NAC at  
573 enrollment, use of standard of care medications at enrollment, and choice of  
574 antimicrobial agent prior to randomization.

575  
576 Handling of Dropouts and Missing Data:  
577 The censoring mechanism is assumed to be non-informative. Supportive analyses will  
578 be performed to assess the impact of a potential informative censoring.

579  
580 Diagnostic tests: The additional continuous covariates to be used in the primary  
581 analysis model will be assessed for major departures from linearity by inspection  
582 scatter plots with LOESS curves. If a departure is observed then a suitable  
583 transformation will be explored. The validity of this model in terms of meeting  
584 modeling assumptions will be assessed via standard modeling diagnostics and  
585 goodness-of-fit measures.

586  
587 Statistical Tests: The linear regression model will be used to estimate outcome  
588 differences between the two treatment arms: “Standard care + oral antimicrobial  
589 therapy” and “Standard care”. The outcome is the measured result at 12 months with  
590 model terms for treatment arm, baseline measurement, and covariates. Descriptive  
591 statistics will be calculated at baseline and 12 months by treatment group.

592  
593 Interpretation of Results: For linear models a difference below 0.00 will indicate a  
594 reduction in score for “Standard care + oral antimicrobial therapy” arm. A difference  
595 above 0.00 will indicate increase in score for “Standard care + oral antimicrobial  
596 therapy” arm.

597 **Secondary Endpoint #12**

598 Endpoint Description: Change in EQ-5D score and SF-12 score from randomization to  
599 12 months

600  
601 Response Variable Definition: The SF-12 questionnaire data will be collected at  
602 baseline and 12 months. The EQ-5D questionnaire data will be collected at baseline  
603 and 12 months. For the collect questionnaire data the EQ-5D score and SF-12 score  
604 will be calculated. The change from baseline will be calculated for the 12 month  
605 values by subtracting the baseline result.

606  
607 Additional Covariates: Age, sex, baseline DLCO, baseline FVC, use of NAC at  
608 enrollment, use of standard of care medications at enrollment, and choice of  
609 antimicrobial agent prior to randomization.

610  
611 Handling of Dropouts and Missing Data:

612 The censoring mechanism is assumed to be non-informative. Supportive analyses will  
613 be performed to assess the impact of a potential informative censoring.

614  
615 Diagnostic tests: The additional continuous covariates to be used in the primary  
616 analysis model will be assessed for major departures from linearity by inspection  
617 scatter plots with LOESS curves. If a departure is observed then a suitable  
618 transformation will be explored. The validity of this model in terms of meeting  
619 modeling assumptions will be assessed via standard modeling diagnostics and  
620 goodness-of-fit measures.

621  
622 Statistical Tests: The linear regression model will be used to estimate outcome  
623 differences between the two treatment arms: “Standard care + oral antimicrobial  
624 therapy” and “Standard care”. The outcome is the measured result at 12 months with  
625 model terms for treatment arm, baseline measurement, and covariates. Descriptive  
626 statistics will be calculated at baseline and 12 months by treatment group.

627  
628 Interpretation of Results: For linear models a difference below 0.00 will indicate a  
629 reduction in score for “Standard care + oral antimicrobial therapy” arm. A difference  
630 above 0.00 will indicate increase in score for “Standard care + oral antimicrobial  
631 therapy” arm.

632 **Secondary Endpoint #13**

633 Endpoint Description: Change in ICEpop CAPability measure for Older people  
634 (ICECAP-O) score from randomization to 12 months

635  
636 Response Variable Definition: The ICECAP-O questionnaire data will be collected at  
637 baseline and 12 months. For the collect questionnaire data the ICECAP-O score will  
638 be calculated. The change from baseline will be calculated for the 12 month values by  
639 subtracting the baseline result.

640  
641 Additional Covariates: Age, sex, baseline DLCO, baseline FVC, use of NAC at  
642 enrollment, use of standard of care medications at enrollment, and choice of  
643 antimicrobial agent prior to randomization.

644

645 Handling of Dropouts and Missing Data: The censoring mechanism is assumed to be  
646 non-informative. Supportive analyses will be performed to assess the impact of a  
647 potential informative censoring.

648  
649 Diagnostic tests: The additional continuous covariates to be used in the primary  
650 analysis model will be assessed for major departures from linearity by inspection  
651 scatter plots with LOESS curves. If a departure is observed then a suitable  
652 transformation will be explored. The validity of this model in terms of meeting  
653 modeling assumptions will be assessed via standard modeling diagnostics and  
654 goodness-of-fit measures.

655  
656 Statistical Tests: The linear regression model will be used to estimate outcome  
657 differences between the two treatment arms: “Standard care + oral antimicrobial  
658 therapy” and “Standard care”. The outcome is the measured result at 12 months with  
659 model terms for treatment arm, baseline measurement, and covariates. Descriptive  
660 statistics will be calculated at baseline and 12 months by treatment group.

661  
662 Interpretation of Results: For linear models a difference below 0.00 will indicate a  
663 reduction in score for “Standard care + oral antimicrobial therapy” arm. A difference  
664 above 0.00 will indicate increase in score for “Standard care + oral antimicrobial  
665 therapy” arm.

666

## 667 IX. Safety endpoints

---

### 668 **Serious adverse events**

669 Endpoint Description: Frequency and types of serious adverse events (SAEs) during  
670 the following-up period of the trial.

671

672 Response Variable Definition: SAEs will be identified by the site PI and coded into the  
673 MEDRA medical dictionary.

674

675 Statistical Tests: The number of patients with one or more SAEs will be tabulated  
676 along with the total number of distinct SAEs. Comparison of the “Standard care + oral  
677 antimicrobial therapy” and “Standard care” arms will be done with a chi-square test,  
678 i.e. the number of patient with one or more events. Other groupings of SAEs maybe  
679 generated as deemed necessary.

680

681 Interpretation of Results: For cases where “Standard care + oral antimicrobial therapy”  
682 rate is less than “Standard care” rate will indicate a reduction for “Standard care +  
683 oral antimicrobial therapy” arm. For cases where “Standard care + oral antimicrobial  
684 therapy” rate is greater than “Standard care” rate will indicate an increase for  
685 “Standard care + oral antimicrobial therapy” arm.

686

### 687 **Concomitant Medication**

688 Endpoint Description: Frequency and types of concomitant medication usage during  
689 the following-up period of the trial.

690

691 Response Variable Definition: Concomitant medication will be collected each visit and  
692 phone contact with the site.

693



694 Statistical Tests: The number of patients with one or more given concomitant  
 695 medication will be tabulated. Shift tables from baseline will be generate also.  
 696 Comparison of the “Standard care + oral antimicrobial therapy” and “Standard care”  
 697 arms will be done with a chi-square test, i.e. the number of patient with one or more  
 698 occurrences. Other groupings of concomitant medication maybe generated as deemed  
 699 necessary.

700  
 701 Interpretation of Results: For cases where “Standard care + oral antimicrobial therapy”  
 702 rate is less than “Standard care” rate will indicate a reduction for “Standard care +  
 703 oral antimicrobial therapy” arm. For cases where “Standard care + oral antimicrobial  
 704 therapy” rate is greater than “Standard care” rate will indicate an increase for  
 705 “Standard care + oral antimicrobial therapy” arm.

706

## 707 X. Trial conduct

---

### 708 **Compliance**

709 Endpoint Description: Rates of therapy distribution and adherence within the  
 710 assigned testing strategy: Standard care + oral antimicrobial therapy.

711

712 Response Variable Definition: Data related to the distribution (payment system for  
 713 prescriptions called TRIALCARD) of the assigned therapy will be collected during  
 714 patient follow-up. Patient response to therapy adherence in weeks prior to contact will  
 715 be collect at 6 months intervals

716

717 Statistical Tests: No statistical tests are planned. The rates of therapy distribution  
 718 and adherence are to be estimated at 6 and 12 months for the Standard care + oral  
 719 antimicrobial therapy assigned patients.

720

### 721 **Therapy crossover**

722 Endpoint Description: Rates of oral antimicrobial therapy crossover for the “Standard  
 723 care” assigned patients.

724

725 Response Variable Definition: Time to first crossover will be defined as the time to first  
 726 oral antimicrobial therapy usage in the patients randomized to “Standard care”

727

728 Statistical Tests: No statistical tests are planned. Kaplan-meier event rates will be  
 729 calculated at representative intervals for ther standard care therapy assigned patients.  
 730 Time to event plots will be generated also. The rates of therapy crossover are to be  
 731 estimated at 6 and 12 months for the standard care therapy assigned patients.

732

## 733 XI. Exploratory analyses

---

### 734 **Six minute walk test**

735 Endpoint Description: Change in six minute walk test and pre/post walk Borg  
 736 assessment from randomization to 12 months

737

738 Response Variable Definition: The six minute walk test data will be collected at  
 739 baseline and 12 months. The change from baseline will be calculated for the 12  
 740 month values by subtracting the baseline result.

741

742 Additional Covariates: Age, sex, baseline DLCO, baseline FVC, use of NAC at  
 743 enrollment, use of standard of care medications at enrollment, and choice of  
 744 antimicrobial agent prior to randomization.

745  
 746 Handling of Dropouts and Missing Data: All patients will have some information  
 747 regarding mortality and last visit of follow-up. Lung transplantation will be additional  
 748 censoring variable in this analyses. The censoring mechanism is assumed to be non-  
 749 informative. Supportive analyses will be performed to assess the impact of a potential  
 750 informative censoring.

751  
 752 Diagnostic tests: The additional continuous covariates to be used in the primary  
 753 analysis model will be assessed for major departures from linearity by inspection  
 754 scatter plots with LOESS curves. If a departure is observed then a suitable  
 755 transformation will be explored. The validity of this model in terms of meeting  
 756 modeling assumptions will be assessed via standard modeling diagnostics and  
 757 goodness-of-fit measures.

758  
 759 Statistical Tests: The linear regression model will be used to estimate outcome  
 760 differences between the two treatment arms: “Standard care + oral antimicrobial  
 761 therapy” and “Standard care”. The outcome is the measured result at 12 months with  
 762 model terms for treatment arm, baseline measurement, and covariates. Descriptive  
 763 statistics will be calculated at baseline and 12 months by treatment group.

764  
 765 Interpretation of Results: For linear models a difference below 0.00 will indicate a  
 766 reduction in score for “Standard care + oral antimicrobial therapy” arm. A difference  
 767 above 0.00 will indicate increase in score for “Standard care + oral antimicrobial  
 768 therapy” arm.

769

## 770 XII. Interim Analyses

---

771 There will be one planned interim review for efficacy. The efficacy review will focus on  
 772 the composite endpoint of respiratory hospitalization or all-cause death and should  
 773 occur once 300 enrolled subjects have been followed for 12 months. The information  
 774 time will be computed by dividing the observed number of primary endpoint events by  
 775 the projected number of primary endpoint events. To conserve the overall type I error  
 776 rate of 0.05 the O'Brien-Fleming Spending Function will be used to allow for stopping  
 777 if large treatment effects are observed while allowing the final significance level to be  
 778 conserved at the nominal level (Lan and DeMets 1983).

779

## 780 XIII. Subgroup of Interest

---

781 The following subgroups of interest will be based on information available prior to  
 782 randomization:

- 783 • Use of standard of care medications at enrollment
- 784 • Antimicrobial therapy determined prior to randomization
- 785 • Use of NAC at enrollment

786 The subgroups of interest will be assess seperately for the primary endpoint within  
 787 the framework of cox proportional hazards regression model. The subgroup variable  
 788 and subgroup by treatment arm intereaction will be added to the model. If the  
 789 interaction is significant then the hazard ratios and 95% confidence intervals will be

790 estimated for the difference in treatment arms for the separate levels of the subgroup  
791 variable.

792 The antimicrobial therapy determined prior to randomization is made up to 2 groups:  
793 1) Co-trimoxazole and 2) Doxycycline. The baseline and primary/secondary analyses  
794 will be repeated for these 2 groups separately.  
795

## 796 XIV. References

797 Berglund, Patricia and Heeringa, Steven. Multiple Imputation of Missing Data Using  
798 SAS®. SAS Institute, July 2014, pp83-89.

799 Lan, KK Gordan, Demets, David L, Discrete sequential boundaries for clinical trials,  
800 Biometrika Volume 70, Issue 3Pp. 659-663  
801

## 802 XV. Tables/Listing/Graph Mock-ups

803 The tables, listings, and figures shown below are the template versions and may be  
804 modified as needed. It is planned that there will be separate sets of tables based on  
805 the subgroups of interest listed above.  
806

**CLEANUP-IPF Study**  
**Final Analysis Table 1.1**  
**Enrollment and Patient Follow-up**  
**Patient Enrollment by Site**

| Investigational Site | Enrolled    |
|----------------------|-------------|
| (101) <<Site name>>  | N/N (xx.x%) |
| (102) <<Site name>>  | N/N (xx.x%) |
| (103) <<Site name>>  | N/N (xx.x%) |
| (104) <<Site name>>  | N/N (xx.x%) |
| ...                  | ...         |
| (140) <<Site name>>  | N/N (xx.x%) |
| Total                | N/N (xx.x%) |

**CLEANUP-IPF Study**  
**Final Analysis Table 1.2**  
**Enrollment and Patient Follow-up**  
**Completed and Withdrawn Patients**

| Event                            | Oral antimicrobial therapy<br>N= N <sub>NEVAL</sub> | Standard Care<br>N= N <sub>NEVAL</sub> | All Patients<br>N= N <sub>NEVAL</sub> | P-Value |
|----------------------------------|-----------------------------------------------------|----------------------------------------|---------------------------------------|---------|
| Started Study                    | N                                                   | N                                      | N                                     |         |
| Completed                        | N/N (xx.x%)                                         | N/N (xx.x%)                            | N/N (xx.x%)                           |         |
| Study Termination due to Death   | N/N (xx.x%)                                         | N/N (xx.x%)                            | N/N (xx.x%)                           |         |
| Withdrawal                       |                                                     |                                        |                                       |         |
| 6 Months                         |                                                     |                                        |                                       | x.xxx   |
| # of Events/# of Patients        | N/N                                                 | N/N                                    | N/N                                   |         |
| Kaplan-Meier Event Rate (95% CI) | xx.x (xx.x, xx.x)                                   | xx.x (xx.x, xx.x)                      | xx.x (xx.x, xx.x)                     |         |
| 12 Months                        |                                                     |                                        |                                       | x.xxx   |
| # of Events/# of Patients        | N/N                                                 | N/N                                    | N/N                                   |         |
| Kaplan-Meier Event Rate (95% CI) | xx.x (xx.x, xx.x)                                   | xx.x (xx.x, xx.x)                      | xx.x (xx.x, xx.x)                     |         |
| 18 Months                        |                                                     |                                        |                                       | x.xxx   |
| # of Events/# of Patients        | N/N                                                 | N/N                                    | N/N                                   |         |
| Kaplan-Meier Event Rate (95% CI) | xx.x (xx.x, xx.x)                                   | xx.x (xx.x, xx.x)                      | xx.x (xx.x, xx.x)                     |         |
| 24 Months                        |                                                     |                                        |                                       | x.xxx   |
| # of Events/# of Patients        | N/N                                                 | N/N                                    | N/N                                   |         |
| Kaplan-Meier Event Rate (95% CI) | xx.x (xx.x, xx.x)                                   | xx.x (xx.x, xx.x)                      | xx.x (xx.x, xx.x)                     |         |
| Reasons for Withdrawal           |                                                     |                                        |                                       |         |
| Reason #1                        | N                                                   | N                                      | N                                     |         |
| Reason #2                        | N                                                   | N                                      | N                                     |         |
| ...                              | ...                                                 | ...                                    | ...                                   |         |
| Reason #X                        | N                                                   | N                                      | N                                     |         |
| Therapy Distribution             |                                                     |                                        |                                       |         |
| 6 Months                         | N/N (xx.x%)                                         |                                        |                                       |         |
| 12 Months                        | N/N (xx.x%)                                         |                                        |                                       |         |
| Therapy adherence (7 Days Prior) |                                                     |                                        |                                       |         |
| 6 Months                         | N/N (xx.x%)                                         |                                        |                                       |         |

**CLEANUP-IPF Study**  
**Final Analysis Table 1.2**  
**Enrollment and Patient Follow-up**  
**Completed and Withdrawn Patients**

| Event                            | Oral antimicrobial therapy<br>N= N <sub>EVAL</sub> | Standard Care<br>N= N <sub>EVAL</sub> | All Patients<br>N= N <sub>EVAL</sub> | P-Value |
|----------------------------------|----------------------------------------------------|---------------------------------------|--------------------------------------|---------|
| 12 Months                        | N/N (xx.x%)                                        |                                       |                                      |         |
| Therapy crossover                |                                                    |                                       |                                      |         |
| 6 Months                         |                                                    |                                       |                                      |         |
| # of Events/# of Patients        | N/N                                                |                                       |                                      |         |
| Kaplan-Meier Event Rate (95% CI) | xx.x (xx.x, xx.x)                                  |                                       |                                      |         |
| 12 Months                        |                                                    |                                       |                                      |         |
| # of Events/# of Patients        | N/N                                                |                                       |                                      |         |
| Kaplan-Meier Event Rate (95% CI) | xx.x (xx.x, xx.x)                                  |                                       |                                      |         |
| 18 Months                        |                                                    |                                       |                                      |         |
| # of Events/# of Patients        | N/N                                                |                                       |                                      |         |
| Kaplan-Meier Event Rate (95% CI) | xx.x (xx.x, xx.x)                                  |                                       |                                      |         |
| 24 Months                        |                                                    |                                       |                                      |         |
| # of Events/# of Patients        | N/N                                                |                                       |                                      |         |
| Kaplan-Meier Event Rate (95% CI) | xx.x (xx.x, xx.x)                                  |                                       |                                      |         |

808

809

810

**CLEANUP-IPF Study**  
**Final Analysis Graph 1.2.1**  
**Enrollment and Patient Follow-up**  
**Completed and Withdrawn Patients**  
**Withdrawal Rate, Kaplan-Meier Estimates**

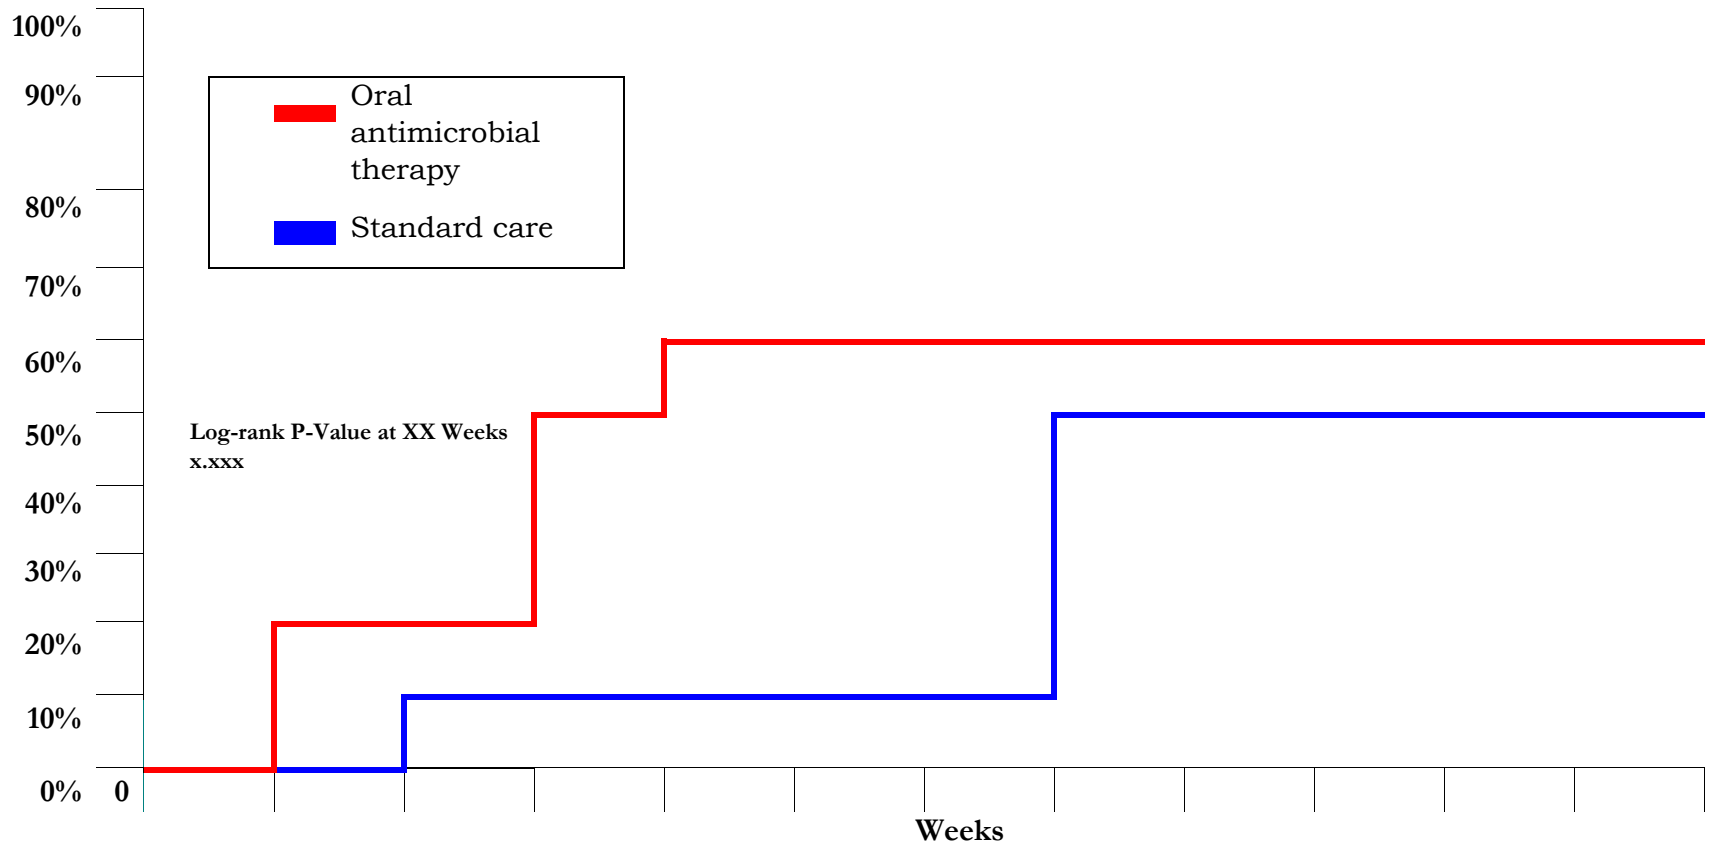

811  
812  
813

**CLEANUP-IPF Study**  
**Final Analysis Table 2.1**  
**Baseline**  
**Demographic and Risk Factor Summary**

| Parameter<br>Statistic                    | Oral antimicrobial therapy<br>N= NEVAL | Standard Care<br>N= NEVAL | All Patients<br>N= NEVAL | P-Value |
|-------------------------------------------|----------------------------------------|---------------------------|--------------------------|---------|
| <b>Age (Years)</b>                        |                                        |                           |                          | x.xxx   |
| N                                         | xx                                     | xx                        | xx                       |         |
| Mean (SD)                                 | xx.x (xx.x)                            | xx.x (xx.x)               | xx.x (xx.x)              |         |
| Median (Q1, Q3)                           | xx.x (xx.x, xx.x)                      | xx.x (xx.x, xx.x)         | xx.x (xx.x, xx.x)        |         |
| Min, Max                                  | x.xx, x.xx                             | x.xx, x.xx                | x.xx, x.xx               |         |
| <b>Female</b>                             | N/N (xx.x%)                            | N/N (xx.x%)               | N/N (xx.x%)              | x.xxx   |
| <b>Weight (kg)</b>                        |                                        |                           |                          | x.xxx   |
| N                                         | xx                                     | xx                        | xx                       |         |
| Mean (SD)                                 | xx.x (xx.x)                            | xx.x (xx.x)               | xx.x (xx.x)              |         |
| Median (Q1, Q3)                           | xx.x (xx.x, xx.x)                      | xx.x (xx.x, xx.x)         | xx.x (xx.x, xx.x)        |         |
| <b>Height (cm)</b>                        |                                        |                           |                          | x.xxx   |
| N                                         | xx                                     | xx                        | xx                       |         |
| Mean (SD)                                 | xx.x (xx.x)                            | xx.x (xx.x)               | xx.x (xx.x)              |         |
| Median (Q1, Q3)                           | xx.x (xx.x, xx.x)                      | xx.x (xx.x, xx.x)         | xx.x (xx.x, xx.x)        |         |
| <b>BMI</b>                                |                                        |                           |                          | x.xxx   |
| N                                         | xx                                     | xx                        | xx                       |         |
| Mean (SD)                                 | xx.x (xx.x)                            | xx.x (xx.x)               | xx.x (xx.x)              |         |
| Median (Q1, Q3)                           | xx.x (xx.x, xx.x)                      | xx.x (xx.x, xx.x)         | xx.x (xx.x, xx.x)        |         |
| <b>Ethnicity (Hispanic or Latino )</b>    | N/N (xx.x%)                            | N/N (xx.x%)               | N/N (xx.x%)              | x.xxx   |
| <b>Race</b>                               |                                        |                           |                          |         |
| American Indian or Alaska Native          | N/N (xx.x%)                            | N/N (xx.x%)               | N/N (xx.x%)              | x.xxx   |
| Asian                                     | N/N (xx.x%)                            | N/N (xx.x%)               | N/N (xx.x%)              | x.xxx   |
| Black or African American                 | N/N (xx.x%)                            | N/N (xx.x%)               | N/N (xx.x%)              | x.xxx   |
| Native Hawaiian or other Pacific Islander | N/N (xx.x%)                            | N/N (xx.x%)               | N/N (xx.x%)              | x.xxx   |
| White                                     | N/N (xx.x%)                            | N/N (xx.x%)               | N/N (xx.x%)              | x.xxx   |
| Other                                     | N/N (xx.x%)                            | N/N (xx.x%)               | N/N (xx.x%)              | x.xxx   |
| <b>Minorities <sup>1</sup></b>            | N/N (xx.x%)                            | N/N (xx.x%)               | N/N (xx.x%)              | x.xxx   |
| <b>BP (systolic)(mmHg)</b>                |                                        |                           |                          | x.xxx   |
| N                                         | xx                                     | xx                        | xx                       |         |



**CLEANUP-IPF Study**  
**Final Analysis Table 2.1**  
**Baseline**  
**Demographic and Risk Factor Summary**

| Parameter<br>Statistic      | Oral antimicrobial therapy<br>N= NEVAL | Standard Care<br>N= NEVAL | All Patients<br>N= NEVAL | P-Value |
|-----------------------------|----------------------------------------|---------------------------|--------------------------|---------|
| Mean (SD)                   | xx.x (xx.x)                            | xx.x (xx.x)               | xx.x (xx.x)              |         |
| Median (Q1, Q3)             | xx.x (xx.x, xx.x)                      | xx.x (xx.x, xx.x)         | xx.x (xx.x, xx.x)        |         |
| <b>BP (diastolic)(mmHg)</b> |                                        |                           |                          | x.xxx   |
| N                           | xx                                     | xx                        | xx                       |         |
| Mean (SD)                   | xx.x (xx.x)                            | xx.x (xx.x)               | xx.x (xx.x)              |         |
| Median (Q1, Q3)             | xx.x (xx.x, xx.x)                      | xx.x (xx.x, xx.x)         | xx.x (xx.x, xx.x)        |         |
| <b>Heart rate (bpm)</b>     |                                        |                           |                          | x.xxx   |
| N                           | xx                                     | xx                        | xx                       |         |
| Mean (SD)                   | xx.x (xx.x)                            | xx.x (xx.x)               | xx.x (xx.x)              |         |
| Median (Q1, Q3)             | xx.x (xx.x, xx.x)                      | xx.x (xx.x, xx.x)         | xx.x (xx.x, xx.x)        |         |
| <b>SpO2 (%)</b>             |                                        |                           |                          | x.xxx   |
| N                           | xx                                     | xx                        | xx                       |         |
| Mean (SD)                   | xx.x (xx.x)                            | xx.x (xx.x)               | xx.x (xx.x)              |         |
| Median (Q1, Q3)             | xx.x (xx.x, xx.x)                      | xx.x (xx.x, xx.x)         | xx.x (xx.x, xx.x)        |         |
| <b>Marital Status</b>       |                                        |                           |                          |         |
| Single                      | N/N (xx.x%)                            | N/N (xx.x%)               | N/N (xx.x%)              | x.xxx   |
| Married                     | N/N (xx.x%)                            | N/N (xx.x%)               | N/N (xx.x%)              | x.xxx   |
| Divorced                    | N/N (xx.x%)                            | N/N (xx.x%)               | N/N (xx.x%)              | x.xxx   |
| Domestic Partner            | N/N (xx.x%)                            | N/N (xx.x%)               | N/N (xx.x%)              | x.xxx   |
| Widowed                     | N/N (xx.x%)                            | N/N (xx.x%)               | N/N (xx.x%)              | x.xxx   |

1. Any patient whose ethnicity is Hispanic or Latino, or whose race is non-white

814  
815  
816  
817

**CLEANUP-IPF Study**  
**Final Analysis Table 2.2**  
**Baseline**  
**Medical History**

| Parameter                        | Oral antimicrobial therapy<br>N= NEVAL | Standard Care<br>N= NEVAL | All Patients<br>N= NEVAL | P-Value |
|----------------------------------|----------------------------------------|---------------------------|--------------------------|---------|
| Coronary artery disease          | N/N (xx.x%)                            | N/N (xx.x%)               | N/N (xx.x%)              | x.xxx   |
| Acute MI                         | N/N (xx.x%)                            | N/N (xx.x%)               | N/N (xx.x%)              | x.xxx   |
| Valvular heart disease           | N/N (xx.x%)                            | N/N (xx.x%)               | N/N (xx.x%)              | x.xxx   |
| Congestive Heart failure         | N/N (xx.x%)                            | N/N (xx.x%)               | N/N (xx.x%)              | x.xxx   |
| Atrial fibrillation              | N/N (xx.x%)                            | N/N (xx.x%)               | N/N (xx.x%)              | x.xxx   |
| Intermittent claudication        | N/N (xx.x%)                            | N/N (xx.x%)               | N/N (xx.x%)              | x.xxx   |
| Peripheral vascular disease      | N/N (xx.x%)                            | N/N (xx.x%)               | N/N (xx.x%)              | x.xxx   |
| Cerebrovascular disease          | N/N (xx.x%)                            | N/N (xx.x%)               | N/N (xx.x%)              | x.xxx   |
| Dementia                         | N/N (xx.x%)                            | N/N (xx.x%)               | N/N (xx.x%)              | x.xxx   |
| Chronic pulmonary disease        | N/N (xx.x%)                            | N/N (xx.x%)               | N/N (xx.x%)              | x.xxx   |
| Connective tissue disease        | N/N (xx.x%)                            | N/N (xx.x%)               | N/N (xx.x%)              | x.xxx   |
| Ulcer disease                    | N/N (xx.x%)                            | N/N (xx.x%)               | N/N (xx.x%)              | x.xxx   |
| Mild liver disease               | N/N (xx.x%)                            | N/N (xx.x%)               | N/N (xx.x%)              | x.xxx   |
| Diabetes                         | N/N (xx.x%)                            | N/N (xx.x%)               | N/N (xx.x%)              | x.xxx   |
| Hemiplegia                       | N/N (xx.x%)                            | N/N (xx.x%)               | N/N (xx.x%)              | x.xxx   |
| Moderate or severe renal disease | N/N (xx.x%)                            | N/N (xx.x%)               | N/N (xx.x%)              | x.xxx   |
| Diabetes with end organ damage   | N/N (xx.x%)                            | N/N (xx.x%)               | N/N (xx.x%)              | x.xxx   |
| Any tumor                        | N/N (xx.x%)                            | N/N (xx.x%)               | N/N (xx.x%)              | x.xxx   |
| Leukemia                         | N/N (xx.x%)                            | N/N (xx.x%)               | N/N (xx.x%)              | x.xxx   |
| Lymphoma                         | N/N (xx.x%)                            | N/N (xx.x%)               | N/N (xx.x%)              | x.xxx   |
| Moderate or severe liver disease | N/N (xx.x%)                            | N/N (xx.x%)               | N/N (xx.x%)              | x.xxx   |
| Metastatic solid tumor           | N/N (xx.x%)                            | N/N (xx.x%)               | N/N (xx.x%)              | x.xxx   |
| AIDS                             | N/N (xx.x%)                            | N/N (xx.x%)               | N/N (xx.x%)              | x.xxx   |
| Lung cancer                      | N/N (xx.x%)                            | N/N (xx.x%)               | N/N (xx.x%)              | x.xxx   |
| Other cancer                     | N/N (xx.x%)                            | N/N (xx.x%)               | N/N (xx.x%)              | x.xxx   |
| Gastroesophageal reflux (GER)    | N/N (xx.x%)                            | N/N (xx.x%)               | N/N (xx.x%)              | x.xxx   |

818

819

**CLEANUP-IPF Study**  
**Final Analysis Table 2.3**  
**Baseline**  
**Prior Medications**

| Parameter                                                    | Oral antimicrobial therapy<br>N= NEVAL | Standard Care<br>N= NEVAL | All Patients<br>N= NEVAL | P-Value |
|--------------------------------------------------------------|----------------------------------------|---------------------------|--------------------------|---------|
| <b>Proton Pump Inhibitors (PPI)</b>                          | N/N (xx.x%)                            | N/N (xx.x%)               | N/N (xx.x%)              | x.xxx   |
| <b>H2 Blockers (H2 Receptor Antagonists)</b>                 | N/N (xx.x%)                            | N/N (xx.x%)               | N/N (xx.x%)              | x.xxx   |
| <b>Chronic prednisone (&gt;1month)</b>                       | N/N (xx.x%)                            | N/N (xx.x%)               | N/N (xx.x%)              | x.xxx   |
| <b>Azathioprine</b>                                          | N/N (xx.x%)                            | N/N (xx.x%)               | N/N (xx.x%)              | x.xxx   |
| <b>N-acetylcysteine (NAC)</b>                                | N/N (xx.x%)                            | N/N (xx.x%)               | N/N (xx.x%)              | x.xxx   |
| <b>Cotrimoxazole</b>                                         | N/N (xx.x%)                            | N/N (xx.x%)               | N/N (xx.x%)              | x.xxx   |
| <b>Albuterol/ atrovent/ other metered-dose inhaler (MDI)</b> | N/N (xx.x%)                            | N/N (xx.x%)               | N/N (xx.x%)              | x.xxx   |
| <b>Pirfenidone</b>                                           | N/N (xx.x%)                            | N/N (xx.x%)               | N/N (xx.x%)              | x.xxx   |
| <b>Nintedanib</b>                                            | N/N (xx.x%)                            | N/N (xx.x%)               | N/N (xx.x%)              | x.xxx   |

820

821

**CLEANUP-IPF Study**  
**Final Analysis Table 2.4**  
**Baseline**  
**6 Minute Walk Test**

| Parameter<br>Statistic                          | Oral antimicrobial therapy<br>N= NEVAL | Standard Care<br>N= NEVAL | All Patients<br>N=NEVAL | P-Value |
|-------------------------------------------------|----------------------------------------|---------------------------|-------------------------|---------|
| <b>Resting SpO2 (%)</b>                         |                                        |                           |                         |         |
| N                                               | xx                                     | xx                        | xx                      | x.xxx   |
| Mean (SD)                                       | x.xx (xx.x)                            | x.xx (xx.x)               | x.xx (xx.x)             |         |
| Median (Q1, Q3)                                 | x.xx (x.xx, x.xx)                      | x.xx (x.xx, x.xx)         | x.xx (x.xx, x.xx)       |         |
| <b>Borg Scale Pre-Walk Rating (0-10 Range)</b>  |                                        |                           |                         |         |
| N                                               | xx                                     | xx                        | xx                      | x.xxx   |
| Mean (SD)                                       | x.xx (xx.x)                            | x.xx (xx.x)               | x.xx (xx.x)             |         |
| Median (Q1, Q3)                                 | x.xx (x.xx, x.xx)                      | x.xx (x.xx, x.xx)         | x.xx (x.xx, x.xx)       |         |
| <b>Borg Scale Post-Walk Rating (0-10 Range)</b> |                                        |                           |                         |         |
| N                                               | xx                                     | xx                        | xx                      | x.xxx   |
| Mean (SD)                                       | x.xx (xx.x)                            | x.xx (xx.x)               | x.xx (xx.x)             |         |
| Median (Q1, Q3)                                 | x.xx (x.xx, x.xx)                      | x.xx (x.xx, x.xx)         | x.xx (x.xx, x.xx)       |         |
| <b>Six Minute Walk Distance (m)</b>             |                                        |                           |                         |         |
| N                                               | xx                                     | xx                        | xx                      | x.xxx   |
| Mean (SD)                                       | x.xx (xx.x)                            | x.xx (xx.x)               | x.xx (xx.x)             |         |
| Median (Q1, Q3)                                 | x.xx (x.xx, x.xx)                      | x.xx (x.xx, x.xx)         | x.xx (x.xx, x.xx)       |         |

822

823

**CLEANUP-IPF Study**  
**Final Analysis Table 3.1**  
**Primary Efficacy**  
**Summary of Events**

| Event                                       | Oral antimicrobial therapy<br>N= N <sub>NEVAL</sub> | Standard Care<br>N= N <sub>NEVAL</sub> | All Patients<br>N= N <sub>NEVAL</sub> | P-Value |
|---------------------------------------------|-----------------------------------------------------|----------------------------------------|---------------------------------------|---------|
| <b>Primary Endpoint</b>                     | N (xx.x%)                                           | N (xx.x%)                              | N (xx.x%)                             | x.xxx   |
| 1 <sup>st</sup> Respiratory hospitalization | N (xx.x%)                                           | N (xx.x%)                              | N (xx.x%)                             |         |
| Death                                       | N (xx.x%)                                           | N (xx.x%)                              | N (xx.x%)                             |         |
| <b>At 6 Months</b>                          |                                                     |                                        |                                       | x.xxx   |
| # of events/# of Patients                   | N/N                                                 | N/N                                    | N/N                                   |         |
| Kaplan-Meier Event Rate (95% CI)            | xx.x (xx.x, xx.x)                                   | xx.x (xx.x, xx.x)                      | xx.x (xx.x, xx.x)                     |         |
| <b>At 12 Monthss</b>                        |                                                     |                                        |                                       | x.xxx   |
| # of events/# of Patients                   | N/N                                                 | N/N                                    | N/N                                   |         |
| Kaplan-Meier Event Rate (95% CI)            | xx.x (xx.x, xx.x)                                   | xx.x (xx.x, xx.x)                      | xx.x (xx.x, xx.x)                     |         |
| <b>At 18 Months</b>                         |                                                     |                                        |                                       | x.xxx   |
| # of events/# of Patients                   | N/N                                                 | N/N                                    | N/N                                   |         |
| Kaplan-Meier Event Rate (95% CI)            | xx.x (xx.x, xx.x)                                   | xx.x (xx.x, xx.x)                      | xx.x (xx.x, xx.x)                     |         |
| <b>At 24 Months</b>                         |                                                     |                                        |                                       | x.xxx   |

**CLEANUP-IPF Study**  
**Final Analysis Table 3.1**  
**Primary Efficacy**  
**Summary of Events**

| Event                            | Oral antimicrobial therapy<br>N= N <sub>NEVAL</sub> | Standard Care<br>N= N <sub>NEVAL</sub> | All Patients<br>N= N <sub>NEVAL</sub> | P-Value |
|----------------------------------|-----------------------------------------------------|----------------------------------------|---------------------------------------|---------|
| # of events/# of Patients        | N/N                                                 | N/N                                    | N/N                                   |         |
| Kaplan-Meier Event Rate (95% CI) | xx.x (xx.x, xx.x)                                   | xx.x (xx.x, xx.x)                      | xx.x (xx.x, xx.x)                     |         |
| <b>Mortality</b>                 |                                                     |                                        |                                       |         |
| # of events                      | N/N                                                 | N/N                                    | N/N                                   |         |
| <b>Cause of Death</b>            |                                                     |                                        |                                       |         |
| Reason #1                        |                                                     |                                        |                                       |         |
| Reason #                         | N                                                   | N                                      | N                                     |         |
| ...                              | ...                                                 | ...                                    | ...                                   |         |
| Reason #X                        | N                                                   | N                                      | N                                     |         |
| <b>At 6 Months</b>               |                                                     |                                        |                                       |         |
| # of events/# of Patients        | N/N                                                 | N/N                                    | N/N                                   | x.xxx   |

**CLEANUP-IPF Study**  
**Final Analysis Table 3.1**  
**Primary Efficacy**  
**Summary of Events**

| Event                                                    | Oral antimicrobial therapy<br>N= NEVAL | Standard Care<br>N= NEVAL | All Patients<br>N= NEVAL | P-Value |
|----------------------------------------------------------|----------------------------------------|---------------------------|--------------------------|---------|
| Kaplan-Meier Event Rate (95% CI)<br><b>At 12 Monthss</b> | xx.x (xx.x, xx.x)                      | xx.x (xx.x, xx.x)         | xx.x (xx.x, xx.x)        | x.xxx   |
| # of events/# of Patients                                | N/N                                    | N/N                       | N/N                      |         |
| Kaplan-Meier Event Rate (95% CI)<br><b>At 18 Months</b>  | xx.x (xx.x, xx.x)                      | xx.x (xx.x, xx.x)         | xx.x (xx.x, xx.x)        | x.xxx   |
| # of events/# of Patients                                | N/N                                    | N/N                       | N/N                      |         |
| Kaplan-Meier Event Rate (95% CI)<br><b>At 24 Months</b>  | xx.x (xx.x, xx.x)                      | xx.x (xx.x, xx.x)         | xx.x (xx.x, xx.x)        | x.xxx   |
| # of events/# of Patients                                | N/N                                    | N/N                       | N/N                      |         |
| Kaplan-Meier Event Rate (95% CI)                         | xx.x (xx.x, xx.x)                      | xx.x (xx.x, xx.x)         | xx.x (xx.x, xx.x)        |         |
| <b>Non-elective hospitalization</b>                      |                                        |                           |                          |         |
| Patients with one of more<br>Number per patient          | N (xx.x%)                              | N (xx.x%)                 | N (xx.x%)                |         |
| 0                                                        | N (xx.x%)                              | N (xx.x%)                 | N (xx.x%)                |         |
| 1                                                        | N (xx.x%)                              | N (xx.x%)                 | N (xx.x%)                |         |
| 2                                                        | N (xx.x%)                              | N (xx.x%)                 | N (xx.x%)                |         |
| 3                                                        | N (xx.x%)                              | N (xx.x%)                 | N (xx.x%)                |         |
| <b>At 6 Months</b>                                       |                                        |                           |                          | x.xxx   |
| # of events/# of Patients                                | N/N                                    | N/N                       | N/N                      |         |
| Kaplan-Meier Event Rate (95% CI)                         | xx.x (xx.x, xx.x)                      | xx.x (xx.x, xx.x)         | xx.x (xx.x, xx.x)        |         |
| <b>At 12 Monthss</b>                                     |                                        |                           |                          | x.xxx   |
| # of events/# of Patients                                | N/N                                    | N/N                       | N/N                      |         |

**CLEANUP-IPF Study**  
**Final Analysis Table 3.1**  
**Primary Efficacy**  
**Summary of Events**

| Event                                                   | Oral antimicrobial therapy<br>N= N <sub>NEVAL</sub> | Standard Care<br>N= N <sub>NEVAL</sub> | All Patients<br>N= N <sub>NEVAL</sub> | P-Value |
|---------------------------------------------------------|-----------------------------------------------------|----------------------------------------|---------------------------------------|---------|
| Kaplan-Meier Event Rate (95% CI)<br><b>At 18 Months</b> | xx.x (xx.x, xx.x)                                   | xx.x (xx.x, xx.x)                      | xx.x (xx.x, xx.x)                     | x.xxx   |
| # of events/# of Patients                               | N/N                                                 | N/N                                    | N/N                                   |         |
| Kaplan-Meier Event Rate (95% CI)<br><b>At 24 Months</b> | xx.x (xx.x, xx.x)                                   | xx.x (xx.x, xx.x)                      | xx.x (xx.x, xx.x)                     | x.xxx   |
| # of events/# of Patients                               | N/N                                                 | N/N                                    | N/N                                   |         |
| Kaplan-Meier Event Rate (95% CI)                        | xx.x (xx.x, xx.x)                                   | xx.x (xx.x, xx.x)                      | xx.x (xx.x, xx.x)                     |         |
| <b>Respiratory hospitalization</b>                      |                                                     |                                        |                                       |         |
| Patients with one of more<br>Number per patient         | N (xx.x%)                                           | N (xx.x%)                              | N (xx.x%)                             |         |
| 0                                                       | N (xx.x%)                                           | N (xx.x%)                              | N (xx.x%)                             |         |
| 1                                                       | N (xx.x%)                                           | N (xx.x%)                              | N (xx.x%)                             |         |
| 2                                                       | N (xx.x%)                                           | N (xx.x%)                              | N (xx.x%)                             |         |
| 3                                                       | N (xx.x%)                                           | N (xx.x%)                              | N (xx.x%)                             |         |
| <b>At 6 Months</b>                                      |                                                     |                                        |                                       | x.xxx   |
| # of events/# of Patients                               | N/N                                                 | N/N                                    | N/N                                   |         |
| Kaplan-Meier Event Rate (95% CI)                        | xx.x (xx.x, xx.x)                                   | xx.x (xx.x, xx.x)                      | xx.x (xx.x, xx.x)                     |         |
| <b>At 12 Months</b>                                     |                                                     |                                        |                                       | x.xxx   |
| # of events/# of Patients                               | N/N                                                 | N/N                                    | N/N                                   |         |
| Kaplan-Meier Event Rate (95% CI)                        | xx.x (xx.x, xx.x)                                   | xx.x (xx.x, xx.x)                      | xx.x (xx.x, xx.x)                     |         |
| <b>At 18 Months</b>                                     |                                                     |                                        |                                       | x.xxx   |
| # of events/# of Patients                               | N/N                                                 | N/N                                    | N/N                                   |         |



**CLEANUP-IPF Study**  
**Final Analysis Table 3.1**  
**Primary Efficacy**  
**Summary of Events**

| Event                            | Oral antimicrobial therapy<br>N= N <sub>EVAL</sub> | Standard Care<br>N= N <sub>EVAL</sub> | All Patients<br>N= N <sub>EVAL</sub> | P-Value |
|----------------------------------|----------------------------------------------------|---------------------------------------|--------------------------------------|---------|
| Kaplan-Meier Event Rate (95% CI) | xx.x (xx.x, xx.x)                                  | xx.x (xx.x, xx.x)                     | xx.x (xx.x, xx.x)                    |         |
| <b>At 24 Months</b>              |                                                    |                                       |                                      | x.xxx   |
| # of events/# of Patients        | N/N                                                | N/N                                   | N/N                                  |         |
| Kaplan-Meier Event Rate (95% CI) | xx.x (xx.x, xx.x)                                  | xx.x (xx.x, xx.x)                     | xx.x (xx.x, xx.x)                    |         |
| <b>Respiratory infections</b>    |                                                    |                                       |                                      |         |
| Patients with one of more        | N (xx.x%)                                          | N (xx.x%)                             | N (xx.x%)                            |         |
| Number per patient               |                                                    |                                       |                                      |         |
| 0                                | N (xx.x%)                                          | N (xx.x%)                             | N (xx.x%)                            |         |
| 1                                | N (xx.x%)                                          | N (xx.x%)                             | N (xx.x%)                            |         |
| 2                                | N (xx.x%)                                          | N (xx.x%)                             | N (xx.x%)                            |         |
| 3                                | N (xx.x%)                                          | N (xx.x%)                             | N (xx.x%)                            |         |

824

825

**CLEANUP-IPF Study**  
**Final Analysis Table 3.1.1**  
**Primary Efficacy**  
**Time to first 1st Respiratory hospitalization or Death**  
**Kaplan-Meier Plot**

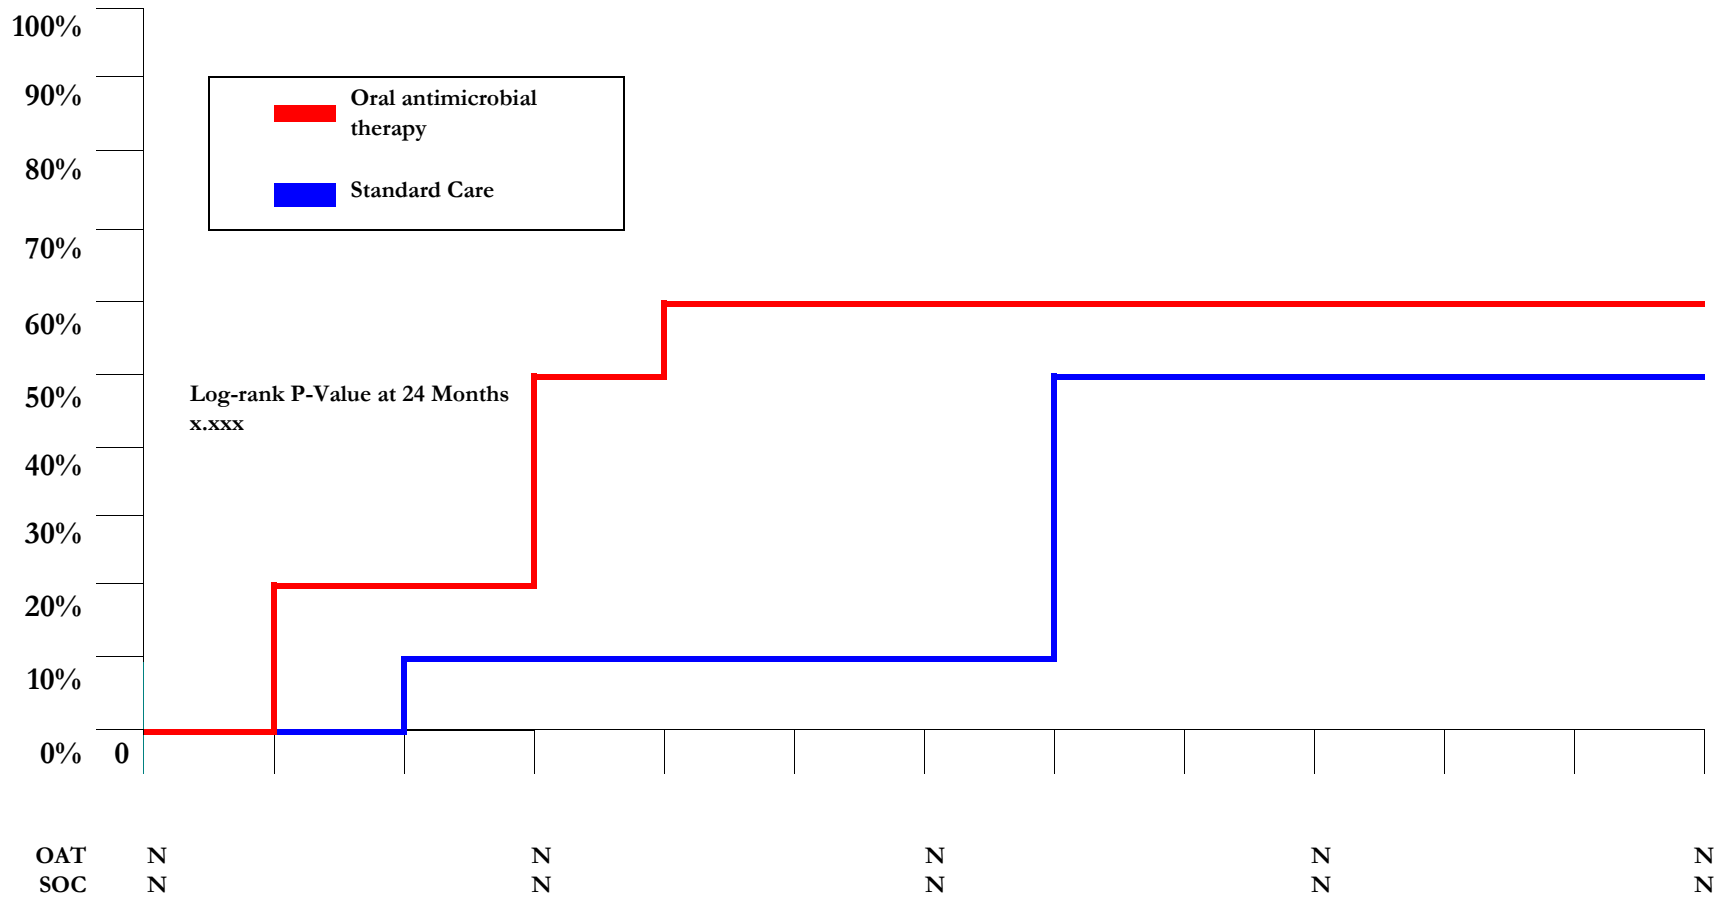

|     |                                                       |
|-----|-------------------------------------------------------|
| 827 | <b>CLEANUP-IPF Study</b>                              |
| 828 | <b>Final Analysis Table 3.1.2</b>                     |
| 829 | <b>Primary Efficacy</b>                               |
| 830 | <b>Time to Death</b>                                  |
| 831 | <b>Kaplan-Meier Plot</b>                              |
| 832 |                                                       |
| 833 | <b>CLEANUP-IPF Study</b>                              |
| 834 | <b>Final Analysis Table 3.1.3</b>                     |
| 835 | <b>Primary Efficacy</b>                               |
| 836 | <b>Time to first 1st Respiratory hospitalization</b>  |
| 837 | <b>Kaplan-Meier Plot</b>                              |
| 838 |                                                       |
| 839 | <b>CLEANUP-IPF Study</b>                              |
| 840 | <b>Final Analysis Table 3.1.4</b>                     |
| 841 | <b>Primary Efficacy</b>                               |
| 842 | <b>Time to first 1st Non-elective hospitalization</b> |
| 843 | <b>Kaplan-Meier Plot</b>                              |
| 844 |                                                       |

**CLEANUP-IPF Study  
Final Analysis Table 3.2  
Primary Efficacy  
Model Analysis**

| Comparison                                                   | Estimate with 95% Confidence Interval | Test Statistic | Nominal P-Value |
|--------------------------------------------------------------|---------------------------------------|----------------|-----------------|
| <b>Time to 1st Respiratory hospitalization or Death</b>      |                                       |                |                 |
| Hazard ratio of Oral antimicrobial therapy vs. Standard Care | xx.xx (xx.xx, xx.xx)                  | xx.xx          | x.xxx           |
| <b>Time to first 1st Respiratory hospitalization</b>         |                                       |                |                 |
| Hazard ratio of Oral antimicrobial therapy vs. Standard Care | xx.xx (xx.xx, xx.xx)                  | xx.xx          | x.xxx           |
| <b>Time to first 1st Non-elective hospitalization</b>        |                                       |                |                 |
| Hazard ratio of Oral antimicrobial therapy vs. Standard Care | xx.xx (xx.xx, xx.xx)                  | xx.xx          | x.xxx           |
| <b>Total Respiratory hospitalizations</b>                    |                                       |                |                 |
| Rate of Oral antimicrobial therapy                           | xx.xx (xx.xx, xx.xx)                  | xxx.xx         |                 |
| Rate of Standard Care                                        | xx.xx (xx.xx, xx.xx)                  | xxx.xx         |                 |
| Ratio of Oral antimicrobial therapy vs. Standard Care        | xx.xx (xx.xx, xx.xx)                  | xx.xx          | x.xxx           |
| <b>Total Non-elective hospitalizations</b>                   |                                       |                |                 |
| Rate of Oral antimicrobial therapy                           | xx.xx (xx.xx, xx.xx)                  | xxx.xx         | x.xxx           |
| Rate of Standard Care                                        | xx.xx (xx.xx, xx.xx)                  | xxx.xx         | x.xxx           |
| Ratio of Oral antimicrobial therapy vs. Standard Care        | xx.xx (xx.xx, xx.xx)                  | xx.xx          | x.xxx           |
| <b>Total Respiratory infections</b>                          |                                       |                |                 |
| Rate of Oral antimicrobial therapy                           | xx.xx (xx.xx, xx.xx)                  | xxx.xx         | x.xxx           |
| Rate of Standard Care                                        | xx.xx (xx.xx, xx.xx)                  | xxx.xx         | x.xxx           |
| Ratio of Oral antimicrobial therapy vs. Standard Care        | xx.xx (xx.xx, xx.xx)                  | xx.xx          | x.xxx           |

845

846

**CLEANUP-IPF Study**  
**Final Analysis Table 4.1.1**  
**Secondary Efficacy**  
**FVC and DLCO**  
**Descriptive Summary**

| <b>Parameter<br/>Visit<br/>Statistic</b> | <b>Oral antimicrobial therapy<br/>N= NEVAL</b> | <b>Standard Care<br/>N= N<sub>EVAl</sub></b> | <b>All Patients<br/>N=N<sub>EVAl</sub></b> | <b>P-Value</b> |
|------------------------------------------|------------------------------------------------|----------------------------------------------|--------------------------------------------|----------------|
| <b>FVC (liters)</b>                      |                                                |                                              |                                            |                |
| <b>Baseline</b>                          |                                                |                                              |                                            | <b>x.xxx</b>   |
| N                                        | xx                                             | xx                                           | xx                                         |                |
| Mean (SD)                                | x.xx (xx.x)                                    | x.xx (xx.x)                                  | x.xx (xx.x)                                |                |
| Median (Q1, Q3)                          | x.xx (x.xx, x.xx)                              | x.xx (x.xx, x.xx)                            | x.xx (x.xx, x.xx)                          |                |
| <b>Week 12</b>                           |                                                |                                              |                                            | <b>x.xxx</b>   |
| N                                        | xx                                             | xx                                           | xx                                         |                |
| Mean (SD)                                | x.xx (xx.x)                                    | x.xx (xx.x)                                  | x.xx (xx.x)                                |                |
| Median (Q1, Q3)                          | x.xx (x.xx, x.xx)                              | x.xx (x.xx, x.xx)                            | x.xx (x.xx, x.xx)                          |                |
| <b>Week 24</b>                           |                                                |                                              |                                            | <b>x.xxx</b>   |
| N                                        | xx                                             | xx                                           | xx                                         |                |
| Mean (SD)                                | x.xx (xx.x)                                    | x.xx (xx.x)                                  | x.xx (xx.x)                                |                |
| Median (Q1, Q3)                          | x.xx (x.xx, x.xx)                              | x.xx (x.xx, x.xx)                            | x.xx (x.xx, x.xx)                          |                |
| <b>FVC % Predicted</b>                   |                                                |                                              |                                            |                |
| <b>Baseline</b>                          |                                                |                                              |                                            | <b>x.xxx</b>   |
| N                                        | xx                                             | xx                                           | xx                                         |                |
| Mean (SD)                                | x.xx (xx.x)                                    | x.xx (xx.x)                                  | x.xx (xx.x)                                |                |
| Median (Q1, Q3)                          | x.xx (x.xx, x.xx)                              | x.xx (x.xx, x.xx)                            | x.xx (x.xx, x.xx)                          |                |
| <b>Week 12</b>                           |                                                |                                              |                                            | <b>x.xxx</b>   |
| N                                        | xx                                             | xx                                           | xx                                         |                |
| Mean (SD)                                | x.xx (xx.x)                                    | x.xx (xx.x)                                  | x.xx (xx.x)                                |                |
| Median (Q1, Q3)                          | x.xx (x.xx, x.xx)                              | x.xx (x.xx, x.xx)                            | x.xx (x.xx, x.xx)                          |                |
| <b>Week 24</b>                           |                                                |                                              |                                            | <b>x.xxx</b>   |
| N                                        | xx                                             | xx                                           | xx                                         |                |

**CLEANUP-IPF Study**  
**Final Analysis Table 4.1.1**  
**Secondary Efficacy**  
**FVC and DLCO**  
**Descriptive Summary**

| <b>Parameter<br/>Visit<br/>Statistic</b>       | <b>Oral antimicrobial therapy<br/>N= NEVAL</b> | <b>Standard Care<br/>N= N<sub>EVAl</sub></b> | <b>All Patients<br/>N=N<sub>EVAl</sub></b> | <b>P-Value</b> |
|------------------------------------------------|------------------------------------------------|----------------------------------------------|--------------------------------------------|----------------|
| Mean (SD)                                      | x.xx (xx.x)                                    | x.xx (xx.x)                                  | x.xx (xx.x)                                |                |
| Median (Q1, Q3)                                | x.xx (x.xx, x.xx)                              | x.xx (x.xx, x.xx)                            | x.xx (x.xx, x.xx)                          |                |
| <b>DL<sub>CO</sub> (mL/min/mmHg)</b>           |                                                |                                              |                                            | x.xxx          |
| <b>Baseline</b>                                |                                                |                                              |                                            | x.xxx          |
| N                                              | xx                                             | xx                                           | xx                                         |                |
| Mean (SD)                                      | x.xx (xx.x)                                    | x.xx (xx.x)                                  | x.xx (xx.x)                                |                |
| Median (Q1, Q3)                                | x.xx (x.xx, x.xx)                              | x.xx (x.xx, x.xx)                            | x.xx (x.xx, x.xx)                          |                |
| <b>Week 12</b>                                 |                                                |                                              |                                            | x.xxx          |
| N                                              | xx                                             | xx                                           | xx                                         |                |
| Mean (SD)                                      | x.xx (xx.x)                                    | x.xx (xx.x)                                  | x.xx (xx.x)                                |                |
| Median (Q1, Q3)                                | x.xx (x.xx, x.xx)                              | x.xx (x.xx, x.xx)                            | x.xx (x.xx, x.xx)                          |                |
| <b>Week 24</b>                                 |                                                |                                              |                                            | x.xxx          |
| N                                              | xx                                             | xx                                           | xx                                         |                |
| Mean (SD)                                      | x.xx (xx.x)                                    | x.xx (xx.x)                                  | x.xx (xx.x)                                |                |
| Median (Q1, Q3)                                | x.xx (x.xx, x.xx)                              | x.xx (x.xx, x.xx)                            | x.xx (x.xx, x.xx)                          |                |
| <b>DL<sub>CO</sub> Corrected (mL/min/mmHg)</b> |                                                |                                              |                                            | x.xxx          |
| <b>Baseline</b>                                |                                                |                                              |                                            | x.xxx          |
| N                                              | xx                                             | xx                                           | xx                                         |                |
| Mean (SD)                                      | x.xx (xx.x)                                    | x.xx (xx.x)                                  | x.xx (xx.x)                                |                |
| Median (Q1, Q3)                                | x.xx (x.xx, x.xx)                              | x.xx (x.xx, x.xx)                            | x.xx (x.xx, x.xx)                          |                |
| <b>Week 12</b>                                 |                                                |                                              |                                            | x.xxx          |
| N                                              | xx                                             | xx                                           | xx                                         |                |
| Mean (SD)                                      | x.xx (xx.x)                                    | x.xx (xx.x)                                  | x.xx (xx.x)                                |                |
| Median (Q1, Q3)                                | x.xx (x.xx, x.xx)                              | x.xx (x.xx, x.xx)                            | x.xx (x.xx, x.xx)                          |                |

**CLEANUP-IPF Study**  
**Final Analysis Table 4.1.1**  
**Secondary Efficacy**  
**FVC and DLCO**  
**Descriptive Summary**

| Parameter<br>Visit<br>Statistic    | Oral antimicrobial therapy<br>N= NEVAL | Standard Care<br>N= N <sub>EVAl</sub> | All Patients<br>N=N <sub>EVAl</sub> | P-Value |
|------------------------------------|----------------------------------------|---------------------------------------|-------------------------------------|---------|
| <b>Week 24</b>                     |                                        |                                       |                                     | x.xxx   |
| N                                  | xx                                     | xx                                    | xx                                  |         |
| Mean (SD)                          | x.xx (xx.x)                            | x.xx (xx.x)                           | x.xx (xx.x)                         |         |
| Median (Q1, Q3)                    | x.xx (x.xx, x.xx)                      | x.xx (x.xx, x.xx)                     | x.xx (x.xx, x.xx)                   |         |
| <b>DL<sub>CO</sub> % Predicted</b> |                                        |                                       |                                     | x.xxx   |
| <b>Baseline</b>                    |                                        |                                       |                                     | x.xxx   |
| N                                  | xx                                     | xx                                    | xx                                  |         |
| Mean (SD)                          | x.xx (xx.x)                            | x.xx (xx.x)                           | x.xx (xx.x)                         |         |
| Median (Q1, Q3)                    | x.xx (x.xx, x.xx)                      | x.xx (x.xx, x.xx)                     | x.xx (x.xx, x.xx)                   |         |
| <b>Week 12</b>                     |                                        |                                       |                                     | x.xxx   |
| N                                  | xx                                     | xx                                    | xx                                  |         |
| Mean (SD)                          | x.xx (xx.x)                            | x.xx (xx.x)                           | x.xx (xx.x)                         |         |
| Median (Q1, Q3)                    | x.xx (x.xx, x.xx)                      | x.xx (x.xx, x.xx)                     | x.xx (x.xx, x.xx)                   |         |
| <b>Week 24</b>                     |                                        |                                       |                                     | x.xxx   |
| N                                  | xx                                     | xx                                    | xx                                  |         |
| Mean (SD)                          | x.xx (xx.x)                            | x.xx (xx.x)                           | x.xx (xx.x)                         |         |
| Median (Q1, Q3)                    | x.xx (x.xx, x.xx)                      | x.xx (x.xx, x.xx)                     | x.xx (x.xx, x.xx)                   |         |

**CLEANUP-IPF Study**  
**Final Analysis Table 4.1.2**  
**Primary Efficacy**  
**FVC and DLCO**  
**Change from Baseline Summary**

| Parameter<br>Visit<br>Statistic      | Oral antimicrobial therapy<br>N= N <sub>NEVAL</sub> | Standard Care<br>N= N <sub>NEVAL</sub> | All Patients<br>N=N <sub>NEVAL</sub> | P-Value |
|--------------------------------------|-----------------------------------------------------|----------------------------------------|--------------------------------------|---------|
| <b>FVC (liters)</b>                  |                                                     |                                        |                                      |         |
| <b>Week 12</b>                       |                                                     |                                        |                                      |         |
| N                                    | xx                                                  | xx                                     | xx                                   | x.xxxx  |
| Mean (SD)                            | x.xx (xx.x)                                         | x.xx (xx.x)                            | x.xx (xx.x)                          |         |
| Median (Q1, Q3)                      | x.xx (x.xx, x.xx)                                   | x.xx (x.xx, x.xx)                      | x.xx (x.xx, x.xx)                    |         |
| <b>Week 24</b>                       |                                                     |                                        |                                      |         |
| N                                    | xx                                                  | xx                                     | xx                                   | x.xxxx  |
| Mean (SD)                            | x.xx (xx.x)                                         | x.xx (xx.x)                            | x.xx (xx.x)                          |         |
| Median (Q1, Q3)                      | x.xx (x.xx, x.xx)                                   | x.xx (x.xx, x.xx)                      | x.xx (x.xx, x.xx)                    |         |
| <b>FVC % Predicted</b>               |                                                     |                                        |                                      |         |
| <b>Week 12</b>                       |                                                     |                                        |                                      |         |
| N                                    | xx                                                  | xx                                     | xx                                   | x.xxxx  |
| Mean (SD)                            | x.xx (xx.x)                                         | x.xx (xx.x)                            | x.xx (xx.x)                          |         |
| Median (Q1, Q3)                      | x.xx (x.xx, x.xx)                                   | x.xx (x.xx, x.xx)                      | x.xx (x.xx, x.xx)                    |         |
| <b>Week 24</b>                       |                                                     |                                        |                                      |         |
| N                                    | xx                                                  | xx                                     | xx                                   | x.xxxx  |
| Mean (SD)                            | x.xx (xx.x)                                         | x.xx (xx.x)                            | x.xx (xx.x)                          |         |
| Median (Q1, Q3)                      | x.xx (x.xx, x.xx)                                   | x.xx (x.xx, x.xx)                      | x.xx (x.xx, x.xx)                    |         |
| <b>DL<sub>CO</sub> (mL/min/mmHg)</b> |                                                     |                                        |                                      |         |
| <b>Week 12</b>                       |                                                     |                                        |                                      |         |
| N                                    | xx                                                  | xx                                     | xx                                   | x.xxxx  |
| Mean (SD)                            | x.xx (xx.x)                                         | x.xx (xx.x)                            | x.xx (xx.x)                          |         |
| Median (Q1, Q3)                      | x.xx (x.xx, x.xx)                                   | x.xx (x.xx, x.xx)                      | x.xx (x.xx, x.xx)                    |         |



**CLEANUP-IPF Study**  
**Final Analysis Table 4.1.2**  
**Primary Efficacy**  
**FVC and DLCO**  
**Change from Baseline Summary**

| Parameter<br>Visit<br>Statistic                | Oral antimicrobial therapy<br>N= NEVAL | Standard Care<br>N= N <sub>EVAL</sub> | All Patients<br>N=N <sub>EVAL</sub> | P-Value |
|------------------------------------------------|----------------------------------------|---------------------------------------|-------------------------------------|---------|
| <b>Week 24</b>                                 |                                        |                                       |                                     | x.xxx   |
| N                                              | xx                                     | xx                                    | xx                                  |         |
| Mean (SD)                                      | x.xx (xx.x)                            | x.xx (xx.x)                           | x.xx (xx.x)                         |         |
| Median (Q1, Q3)                                | x.xx (x.xx, x.xx)                      | x.xx (x.xx, x.xx)                     | x.xx (x.xx, x.xx)                   |         |
| <b>DL<sub>CO</sub> Corrected (mL/min/mmHg)</b> |                                        |                                       |                                     |         |
| <b>Week 12</b>                                 |                                        |                                       |                                     | x.xxx   |
| N                                              | xx                                     | xx                                    | xx                                  |         |
| Mean (SD)                                      | x.xx (xx.x)                            | x.xx (xx.x)                           | x.xx (xx.x)                         |         |
| Median (Q1, Q3)                                | x.xx (x.xx, x.xx)                      | x.xx (x.xx, x.xx)                     | x.xx (x.xx, x.xx)                   |         |
| <b>Week 24</b>                                 |                                        |                                       |                                     | x.xxx   |
| N                                              | xx                                     | xx                                    | xx                                  |         |
| Mean (SD)                                      | x.xx (xx.x)                            | x.xx (xx.x)                           | x.xx (xx.x)                         |         |
| Median (Q1, Q3)                                | x.xx (x.xx, x.xx)                      | x.xx (x.xx, x.xx)                     | x.xx (x.xx, x.xx)                   |         |
| <b>DL<sub>CO</sub> % Predicted</b>             |                                        |                                       |                                     |         |
| <b>Week 12</b>                                 |                                        |                                       |                                     | x.xxx   |
| N                                              | xx                                     | xx                                    | xx                                  |         |
| Mean (SD)                                      | x.xx (xx.x)                            | x.xx (xx.x)                           | x.xx (xx.x)                         |         |
| Median (Q1, Q3)                                | x.xx (x.xx, x.xx)                      | x.xx (x.xx, x.xx)                     | x.xx (x.xx, x.xx)                   |         |
| <b>Week 24</b>                                 |                                        |                                       |                                     | x.xxx   |
| N                                              | xx                                     | xx                                    | xx                                  |         |
| Mean (SD)                                      | x.xx (xx.x)                            | x.xx (xx.x)                           | x.xx (xx.x)                         |         |
| Median (Q1, Q3)                                | x.xx (x.xx, x.xx)                      | x.xx (x.xx, x.xx)                     | x.xx (x.xx, x.xx)                   |         |

**CLEANUP-IPF Study**  
**Final Analysis Table 4.1.3**  
**Secondary Efficacy**  
**FVC and DLCO**  
**Model Analysis**

| Comparison                                                 | Estimate with 95% Confidence Interval | Test Statistic | Nominal P-Value |
|------------------------------------------------------------|---------------------------------------|----------------|-----------------|
| <b>FVC (liters)</b>                                        |                                       |                |                 |
| Slope of Oral antimicrobial therapy                        | xx.xx (xx.xx, xx.xx)                  | xxx.xx         | x.xxx           |
| Slope of Standard Care                                     | xx.xx (xx.xx, xx.xx)                  | xxx.xx         | x.xxx           |
| Difference of Oral antimicrobial therapy vs. Standard Care | xx.xx (xx.xx, xx.xx)                  | xx.xx          | x.xxx           |
| <b>FVC % Predicted</b>                                     |                                       |                |                 |
| Slope of Oral antimicrobial therapy                        | xx.xx (xx.xx, xx.xx)                  | xxx.xx         | x.xxx           |
| Slope of Standard Care                                     | xx.xx (xx.xx, xx.xx)                  | xxx.xx         | x.xxx           |
| Difference of Oral antimicrobial therapy vs. Standard Care | xx.xx (xx.xx, xx.xx)                  | xx.xx          | x.xxx           |
| <b>DL<sub>CO</sub> (mL/min/mmHg)</b>                       |                                       |                |                 |
| Slope of Oral antimicrobial therapy                        | xx.xx (xx.xx, xx.xx)                  | xxx.xx         | x.xxx           |
| Slope of Standard Care                                     | xx.xx (xx.xx, xx.xx)                  | xxx.xx         | x.xxx           |
| Difference of Oral antimicrobial therapy vs. Standard Care | xx.xx (xx.xx, xx.xx)                  | xx.xx          | x.xxx           |
| <b>DL<sub>CO</sub> Corrected (mL/min/mmHg)</b>             |                                       |                |                 |
| Slope of Oral antimicrobial therapy                        | xx.xx (xx.xx, xx.xx)                  | xxx.xx         | x.xxx           |
| Slope of Standard Care                                     | xx.xx (xx.xx, xx.xx)                  | xxx.xx         | x.xxx           |

|                                                               |                      |        |       |
|---------------------------------------------------------------|----------------------|--------|-------|
| Difference of Oral antimicrobial therapy vs.<br>Standard Care | xx.xx (xx.xx, xx.xx) | xx.xx  | x.xxx |
| <b>DL<sub>CO</sub> % Predicted</b>                            |                      |        |       |
| Slope of Oral antimicrobial therapy                           | xx.xx (xx.xx, xx.xx) | xxx.xx | x.xxx |
| Slope of Standard Care                                        | xx.xx (xx.xx, xx.xx) | xxx.xx | x.xxx |
| Difference of Oral antimicrobial therapy vs.<br>Standard Care | xx.xx (xx.xx, xx.xx) | xx.xx  | x.xxx |

---

**CLEANUP-IPF Study**  
**Final Analysis Table 4.2.1**  
**Secondary Efficacy**  
**Quality of Life Measures**  
**Descriptive Summary**

| Parameter<br>Visit<br>Statistic            | Oral antimicrobial therapy<br>N= NEVAL | Standard Care<br>N= N <sub>EQVAL</sub> | All Patients<br>N=N <sub>EQVAL</sub> | P-Value |
|--------------------------------------------|----------------------------------------|----------------------------------------|--------------------------------------|---------|
| <b>UCSD Shortness of Breath</b>            |                                        |                                        |                                      |         |
| <b>Questionnaire Total Score (0*-120</b>   |                                        |                                        |                                      |         |
| <b>Range)</b>                              |                                        |                                        |                                      |         |
| <b>Baseline</b>                            |                                        |                                        |                                      |         |
| N                                          | XX                                     | XX                                     | XX                                   | X.XXX   |
| Mean (SD)                                  | X.XX (XX.X)                            | X.XX (XX.X)                            | X.XX (XX.X)                          |         |
| Median (Q1, Q3)                            | X.XX (X.XX, X.XX)                      | X.XX (X.XX, X.XX)                      | X.XX (X.XX, X.XX)                    |         |
| <b>12 Months</b>                           |                                        |                                        |                                      |         |
| N                                          | XX                                     | XX                                     | XX                                   | X.XXX   |
| Mean (SD)                                  | X.XX (XX.X)                            | X.XX (XX.X)                            | X.XX (XX.X)                          |         |
| Median (Q1, Q3)                            | X.XX (X.XX, X.XX)                      | X.XX (X.XX, X.XX)                      | X.XX (X.XX, X.XX)                    |         |
| <b>24 Months</b>                           |                                        |                                        |                                      |         |
| N                                          | XX                                     | XX                                     | XX                                   | X.XXX   |
| Mean (SD)                                  | X.XX (XX.X)                            | X.XX (XX.X)                            | X.XX (XX.X)                          |         |
| Median (Q1, Q3)                            | X.XX (X.XX, X.XX)                      | X.XX (X.XX, X.XX)                      | X.XX (X.XX, X.XX)                    |         |
| <b>EuroQoL Score(0-1* Range)</b>           |                                        |                                        |                                      |         |
| <b>EuroQoL Thermometer Response</b>        |                                        |                                        |                                      |         |
| <b>(0-100* Range)</b>                      |                                        |                                        |                                      |         |
| <b>ICECAP-O: Summary Score (0-1*</b>       |                                        |                                        |                                      |         |
| <b>Range)</b>                              |                                        |                                        |                                      |         |
| <b>SF-12 Score</b>                         |                                        |                                        |                                      |         |
| <b>Fatigue Severity Scale score</b>        |                                        |                                        |                                      |         |
| <b>Leicester Cough Questionnaire score</b> |                                        |                                        |                                      |         |

**CLEANUP-IPF Study**  
**Final Analysis Table 4.2.2**  
**Secondary Efficacy**  
**Quality of Life Measures**  
**Change from Baseline Summary**

| Parameter<br>Visit<br>Statistic            | Oral antimicrobial therapy<br>N= NEVAL | Standard Care<br>N= N <sub>EVAl</sub> | All Patients<br>N=N <sub>EVAl</sub> | P-Value |
|--------------------------------------------|----------------------------------------|---------------------------------------|-------------------------------------|---------|
| <b>UCSD Shortness of Breath</b>            |                                        |                                       |                                     |         |
| <b>Questionnaire Total Score (0*-120</b>   |                                        |                                       |                                     |         |
| <b>Range)</b>                              |                                        |                                       |                                     |         |
| <b>12 Months</b>                           |                                        |                                       |                                     |         |
| N                                          | XX                                     | XX                                    | XX                                  | X.XXX   |
| Mean (SD)                                  | X.XX (XX.X)                            | X.XX (XX.X)                           | X.XX (XX.X)                         |         |
| Median (Q1, Q3)                            | X.XX (X.XX, X.XX)                      | X.XX (X.XX, X.XX)                     | X.XX (X.XX, X.XX)                   |         |
| <b>24 Months</b>                           |                                        |                                       |                                     |         |
| N                                          | XX                                     | XX                                    | XX                                  | X.XXX   |
| Mean (SD)                                  | X.XX (XX.X)                            | X.XX (XX.X)                           | X.XX (XX.X)                         |         |
| Median (Q1, Q3)                            | X.XX (X.XX, X.XX)                      | X.XX (X.XX, X.XX)                     | X.XX (X.XX, X.XX)                   |         |
| <b>EuroQoL Score(0-1* Range)</b>           |                                        |                                       |                                     |         |
| <b>EuroQoL Thermometer Response</b>        |                                        |                                       |                                     |         |
| <b>(0-100* Range)</b>                      |                                        |                                       |                                     |         |
| <b>ICECAP-O: Summary Score (0-1*</b>       |                                        |                                       |                                     |         |
| <b>Range)</b>                              |                                        |                                       |                                     |         |
| <b>SF-12 Score</b>                         |                                        |                                       |                                     |         |
| <b>Fatigue Severity Scale score</b>        |                                        |                                       |                                     |         |
| <b>Leicester Cough Questionnaire score</b> |                                        |                                       |                                     |         |

851

852

853

**CLEANUP-IPF Study  
Final Analysis Table 4.2.3  
Secondary Efficacy  
Quality of Life Measures  
Model Analysis**

| Comparison                                                 | Estimate with 95% Confidence Interval | Test Statistic | Nominal P-Value |
|------------------------------------------------------------|---------------------------------------|----------------|-----------------|
| <b>UCSD Shortness of Breath Questionnaire Total Score</b>  |                                       |                |                 |
| Slope of Oral antimicrobial therapy                        | xx.xx (xx.xx, xx.xx)                  | xxx.xx         | x.xxx           |
| Slope of Standard Care                                     | xx.xx (xx.xx, xx.xx)                  | xxx.xx         | x.xxx           |
| Difference of Oral antimicrobial therapy vs. Standard Care | xx.xx (xx.xx, xx.xx)                  | xx.xx          | x.xxx           |
| <b>EuroQoL Thermometer Response</b>                        |                                       |                |                 |
| Slope of Oral antimicrobial therapy                        | xx.xx (xx.xx, xx.xx)                  | xxx.xx         | x.xxx           |
| Slope of Standard Care                                     | xx.xx (xx.xx, xx.xx)                  | xxx.xx         | x.xxx           |
| Difference of Oral antimicrobial therapy vs. Standard Care | xx.xx (xx.xx, xx.xx)                  | xx.xx          | x.xxx           |
| <b>ICECAP-O: Summary Score</b>                             |                                       |                |                 |
| Slope of Oral antimicrobial therapy                        | xx.xx (xx.xx, xx.xx)                  | xxx.xx         | x.xxx           |
| Slope of Standard Care                                     | xx.xx (xx.xx, xx.xx)                  | xxx.xx         | x.xxx           |
| Difference of Oral antimicrobial therapy vs. Standard Care | xx.xx (xx.xx, xx.xx)                  | xx.xx          | x.xxx           |
| <b>SF-12 Score</b>                                         |                                       |                |                 |
| Slope of Oral antimicrobial therapy                        | xx.xx (xx.xx, xx.xx)                  | xxx.xx         | x.xxx           |
| Slope of Standard Care                                     | xx.xx (xx.xx, xx.xx)                  | xxx.xx         | x.xxx           |

|                                                            |                      |        |       |
|------------------------------------------------------------|----------------------|--------|-------|
| Difference of Oral antimicrobial therapy vs. Standard Care | xx.xx (xx.xx, xx.xx) | xx.xx  | x.xxx |
| <b>Fatigue Severity Scale score</b>                        |                      |        |       |
| Slope of Oral antimicrobial therapy                        | xx.xx (xx.xx, xx.xx) | xxx.xx | x.xxx |
| Slope of Standard Care                                     | xx.xx (xx.xx, xx.xx) | xxx.xx | x.xxx |
| Difference of Oral antimicrobial therapy vs. Standard Care | xx.xx (xx.xx, xx.xx) | xx.xx  | x.xxx |
| <b>Leicester Cough Questionnaire score</b>                 |                      |        |       |
| Slope of Oral antimicrobial therapy                        | xx.xx (xx.xx, xx.xx) | xxx.xx | x.xxx |
| Slope of Standard Care                                     | xx.xx (xx.xx, xx.xx) | xxx.xx | x.xxx |
| Difference of Oral antimicrobial therapy vs. Standard Care | xx.xx (xx.xx, xx.xx) | xx.xx  | x.xxx |

---

**CLEANUP-IPF Study**  
**Final Analysis Table 5.1**  
**Safety**  
**Serious Adverse Events**

| Body System<br>Event Name        | Oral antimicrobial therapy<br>N= NEVAL | Standard Care<br>N= NEVAL  | All Patients<br>N= NEVAL   | P-Value |
|----------------------------------|----------------------------------------|----------------------------|----------------------------|---------|
| Any Body System and Event        | $N_{PAT} (xx.x\%) N_{SAE}$             | $N_{PAT} (xx.x\%) N_{SAE}$ | $N_{PAT} (xx.x\%) N_{SAE}$ | x.xxx   |
| 1 <sup>st</sup> Body System Name | $N_{PAT} (xx.x\%) N_{SAE}$             | $N_{PAT} (xx.x\%) N_{SAE}$ | $N_{PAT} (xx.x\%) N_{SAE}$ | x.xxx   |
| 1 <sup>st</sup> Event Name       | $N_{PAT} (xx.x\%) N_{SAE}$             | $N_{PAT} (xx.x\%) N_{SAE}$ | $N_{PAT} (xx.x\%) N_{SAE}$ | x.xxx   |
| 2 <sup>nd</sup> Event Name       | $N_{PAT} (xx.x\%) N_{SAE}$             | $N_{PAT} (xx.x\%) N_{SAE}$ | $N_{PAT} (xx.x\%) N_{SAE}$ | x.xxx   |
| ...                              | $N_{PAT} (xx.x\%) N_{SAE}$             | $N_{PAT} (xx.x\%) N_{SAE}$ | $N_{PAT} (xx.x\%) N_{SAE}$ | x.xxx   |
| X <sup>th</sup> Event Name       | $N_{PAT} (xx.x\%) N_{SAE}$             | $N_{PAT} (xx.x\%) N_{SAE}$ | $N_{PAT} (xx.x\%) N_{SAE}$ | x.xxx   |
| 2 <sup>nd</sup> Body System Name | $N_{PAT} (xx.x\%) N_{SAE}$             | $N_{PAT} (xx.x\%) N_{SAE}$ | $N_{PAT} (xx.x\%) N_{SAE}$ | x.xxx   |
| 1 <sup>st</sup> Event Name       | $N_{PAT} (xx.x\%) N_{SAE}$             | $N_{PAT} (xx.x\%) N_{SAE}$ | $N_{PAT} (xx.x\%) N_{SAE}$ | x.xxx   |
| 2 <sup>nd</sup> Event Name       | $N_{PAT} (xx.x\%) N_{SAE}$             | $N_{PAT} (xx.x\%) N_{SAE}$ | $N_{PAT} (xx.x\%) N_{SAE}$ | x.xxx   |
| ...                              | $N_{PAT} (xx.x\%) N_{SAE}$             | $N_{PAT} (xx.x\%) N_{SAE}$ | $N_{PAT} (xx.x\%) N_{SAE}$ | x.xxx   |
| X <sup>th</sup> Event Name       | $N_{PAT} (xx.x\%) N_{SAE}$             | $N_{PAT} (xx.x\%) N_{SAE}$ | $N_{PAT} (xx.x\%) N_{SAE}$ | x.xxx   |
| X <sup>th</sup> Body System Name | $N_{PAT} (xx.x\%) N_{SAE}$             | $N_{PAT} (xx.x\%) N_{SAE}$ | $N_{PAT} (xx.x\%) N_{SAE}$ | x.xxx   |
| 1 <sup>st</sup> Event Name       | $N_{PAT} (xx.x\%) N_{SAE}$             | $N_{PAT} (xx.x\%) N_{SAE}$ | $N_{PAT} (xx.x\%) N_{SAE}$ | x.xxx   |
| 2 <sup>nd</sup> Event Name       | $N_{PAT} (xx.x\%) N_{SAE}$             | $N_{PAT} (xx.x\%) N_{SAE}$ | $N_{PAT} (xx.x\%) N_{SAE}$ | x.xxx   |
| ...                              | $N_{PAT} (xx.x\%) N_{SAE}$             | $N_{PAT} (xx.x\%) N_{SAE}$ | $N_{PAT} (xx.x\%) N_{SAE}$ | x.xxx   |
| X <sup>th</sup> Event Name       | $N_{PAT} (xx.x\%) N_{SAE}$             | $N_{PAT} (xx.x\%) N_{SAE}$ | $N_{PAT} (xx.x\%) N_{SAE}$ | x.xxx   |

Summarization format  $N_{PAT} (xx.x\%) N_{SAE}$ , where  $N_{PAT}$  is the number of patient with at least one SAE,  $xx.x\% = N_{PAT}$  divided by the total number of randomized patients times 100, and  $N_{SAE}$  is the number of SAEs observed



**CLEANUP-IPF Study**  
**Final Analysis Table 5.2**  
**Safety**  
**Concomitant Medications Shift Table**

| Parameter                 | Baseline Usage | Post-Baseline Usage | Oral antimicrobial therapy<br>N= NEVAL | Standard Care<br>N= N <sub>NEVAL</sub> | All Patients<br>N= N <sub>NEVAL</sub> |
|---------------------------|----------------|---------------------|----------------------------------------|----------------------------------------|---------------------------------------|
| <b>PPI</b>                |                |                     |                                        |                                        |                                       |
|                           | No             | No                  | N/N (xx.x%)                            | N/N (xx.x%)                            | N/N (xx.x%)                           |
|                           |                | Yes                 | N/N (xx.x%)                            | N/N (xx.x%)                            | N/N (xx.x%)                           |
|                           | Yes            | No                  | N/N (xx.x%)                            | N/N (xx.x%)                            | N/N (xx.x%)                           |
|                           |                | Yes                 | N/N (xx.x%)                            | N/N (xx.x%)                            | N/N (xx.x%)                           |
|                           | Overall        | No                  | N/N (xx.x%)                            | N/N (xx.x%)                            | N/N (xx.x%)                           |
|                           |                | Yes                 | N/N (xx.x%)                            | N/N (xx.x%)                            | N/N (xx.x%)                           |
| <b>H2 Blocker</b>         |                |                     |                                        |                                        |                                       |
|                           | No             | No                  | N/N (xx.x%)                            | N/N (xx.x%)                            | N/N (xx.x%)                           |
|                           |                | Yes                 | N/N (xx.x%)                            | N/N (xx.x%)                            | N/N (xx.x%)                           |
|                           | Yes            | No                  | N/N (xx.x%)                            | N/N (xx.x%)                            | N/N (xx.x%)                           |
|                           |                | Yes                 | N/N (xx.x%)                            | N/N (xx.x%)                            | N/N (xx.x%)                           |
|                           | Overall        | No                  | N/N (xx.x%)                            | N/N (xx.x%)                            | N/N (xx.x%)                           |
|                           |                | Yes                 | N/N (xx.x%)                            | N/N (xx.x%)                            | N/N (xx.x%)                           |
| <b>Chronic prednisone</b> |                |                     |                                        |                                        |                                       |
|                           | No             | No                  | N/N (xx.x%)                            | N/N (xx.x%)                            | N/N (xx.x%)                           |
|                           |                | Yes                 | N/N (xx.x%)                            | N/N (xx.x%)                            | N/N (xx.x%)                           |
|                           | Yes            | No                  | N/N (xx.x%)                            | N/N (xx.x%)                            | N/N (xx.x%)                           |
|                           |                | Yes                 | N/N (xx.x%)                            | N/N (xx.x%)                            | N/N (xx.x%)                           |
|                           | Overall        | No                  | N/N (xx.x%)                            | N/N (xx.x%)                            | N/N (xx.x%)                           |
|                           |                | Yes                 | N/N (xx.x%)                            | N/N (xx.x%)                            | N/N (xx.x%)                           |
| <b>Azathioprine</b>       |                |                     |                                        |                                        |                                       |
|                           | No             | No                  | N/N (xx.x%)                            | N/N (xx.x%)                            | N/N (xx.x%)                           |
|                           |                | Yes                 | N/N (xx.x%)                            | N/N (xx.x%)                            | N/N (xx.x%)                           |
|                           | Yes            | No                  | N/N (xx.x%)                            | N/N (xx.x%)                            | N/N (xx.x%)                           |

**CLEANUP-IPF Study**  
**Final Analysis Table 5.2**  
**Safety**  
**Concomitant Medications Shift Table**

| Parameter            | Baseline Usage | Post-Baseline Usage | Oral antimicrobial therapy<br>N= N <sub>NEVAL</sub> | Standard Care<br>N= N <sub>NEVAL</sub> | All Patients<br>N= N <sub>NEVAL</sub> |
|----------------------|----------------|---------------------|-----------------------------------------------------|----------------------------------------|---------------------------------------|
| <b>NAC</b>           | Overall        | Yes                 | N/N (xx.x%)                                         | N/N (xx.x%)                            | N/N (xx.x%)                           |
|                      |                | No                  | N/N (xx.x%)                                         | N/N (xx.x%)                            | N/N (xx.x%)                           |
|                      |                | Yes                 | N/N (xx.x%)                                         | N/N (xx.x%)                            | N/N (xx.x%)                           |
|                      | Yes            | No                  | N/N (xx.x%)                                         | N/N (xx.x%)                            | N/N (xx.x%)                           |
|                      |                | Yes                 | N/N (xx.x%)                                         | N/N (xx.x%)                            | N/N (xx.x%)                           |
|                      |                | Overall             | No                                                  | N/N (xx.x%)                            | N/N (xx.x%)                           |
| <b>Cotrimoxazole</b> | Overall        | Yes                 | N/N (xx.x%)                                         | N/N (xx.x%)                            | N/N (xx.x%)                           |
|                      |                | No                  | N/N (xx.x%)                                         | N/N (xx.x%)                            | N/N (xx.x%)                           |
|                      |                | Yes                 | N/N (xx.x%)                                         | N/N (xx.x%)                            | N/N (xx.x%)                           |
|                      | Yes            | No                  | N/N (xx.x%)                                         | N/N (xx.x%)                            | N/N (xx.x%)                           |
|                      |                | Yes                 | N/N (xx.x%)                                         | N/N (xx.x%)                            | N/N (xx.x%)                           |
|                      |                | Overall             | No                                                  | N/N (xx.x%)                            | N/N (xx.x%)                           |
| <b>MDI</b>           | Overall        | Yes                 | N/N (xx.x%)                                         | N/N (xx.x%)                            | N/N (xx.x%)                           |
|                      |                | No                  | N/N (xx.x%)                                         | N/N (xx.x%)                            | N/N (xx.x%)                           |
|                      |                | Yes                 | N/N (xx.x%)                                         | N/N (xx.x%)                            | N/N (xx.x%)                           |
|                      | Yes            | No                  | N/N (xx.x%)                                         | N/N (xx.x%)                            | N/N (xx.x%)                           |
|                      |                | Yes                 | N/N (xx.x%)                                         | N/N (xx.x%)                            | N/N (xx.x%)                           |
|                      |                | Overall             | No                                                  | N/N (xx.x%)                            | N/N (xx.x%)                           |

**CLEANUP-IPF Study**  
**Final Analysis Table 5.2**  
**Safety**  
**Concomitant Medications Shift Table**

| Parameter          | Baseline Usage | Post-Baseline Usage | Oral antimicrobial therapy<br>N= N <sub>NEVAL</sub> | Standard Care<br>N= N <sub>NEVAL</sub> | All Patients<br>N= N <sub>NEVAL</sub> |
|--------------------|----------------|---------------------|-----------------------------------------------------|----------------------------------------|---------------------------------------|
| <b>Pirfenidone</b> |                | Yes                 | N/N (xx.x%)                                         | N/N (xx.x%)                            | N/N (xx.x%)                           |
|                    | No             | No                  | N/N (xx.x%)                                         | N/N (xx.x%)                            | N/N (xx.x%)                           |
|                    |                | Yes                 | N/N (xx.x%)                                         | N/N (xx.x%)                            | N/N (xx.x%)                           |
|                    | Yes            | No                  | N/N (xx.x%)                                         | N/N (xx.x%)                            | N/N (xx.x%)                           |
|                    |                | Yes                 | N/N (xx.x%)                                         | N/N (xx.x%)                            | N/N (xx.x%)                           |
|                    | Overall        | No                  | N/N (xx.x%)                                         | N/N (xx.x%)                            | N/N (xx.x%)                           |
| <b>Nintedanib</b>  |                | Yes                 | N/N (xx.x%)                                         | N/N (xx.x%)                            | N/N (xx.x%)                           |
|                    | No             | No                  | N/N (xx.x%)                                         | N/N (xx.x%)                            | N/N (xx.x%)                           |
|                    |                | Yes                 | N/N (xx.x%)                                         | N/N (xx.x%)                            | N/N (xx.x%)                           |
|                    | Yes            | No                  | N/N (xx.x%)                                         | N/N (xx.x%)                            | N/N (xx.x%)                           |
|                    |                | Yes                 | N/N (xx.x%)                                         | N/N (xx.x%)                            | N/N (xx.x%)                           |
|                    | Overall        | No                  | N/N (xx.x%)                                         | N/N (xx.x%)                            | N/N (xx.x%)                           |
|                    | Yes            | N/N (xx.x%)         | N/N (xx.x%)                                         | N/N (xx.x%)                            |                                       |

857

858

**CLEANUP-IPF Study**  
**Final Analysis Table 6.1.1**  
**Exploratory Endpoint**  
**Six Minute Walk Test**  
**Descriptive Summary**

| <b>Parameter<br/>Visit<br/>Statistic</b>       | <b>Oral antimicrobial therapy<br/>N= NEVAL</b> | <b>Standard Care<br/>N= N<sub>EVAL</sub></b> | <b>All Patients<br/>N=N<sub>EVAL</sub></b> | <b>P-Value</b> |
|------------------------------------------------|------------------------------------------------|----------------------------------------------|--------------------------------------------|----------------|
| <b>Resting SpO2 (%)</b>                        |                                                |                                              |                                            |                |
| <b>Baseline</b>                                |                                                |                                              |                                            | <b>x.xxx</b>   |
| N                                              | xx                                             | xx                                           | xx                                         |                |
| Mean (SD)                                      | x.xx (xx.x)                                    | x.xx (xx.x)                                  | x.xx (xx.x)                                |                |
| Median (Q1, Q3)                                | x.xx (x.xx, x.xx)                              | x.xx (x.xx, x.xx)                            | x.xx (x.xx, x.xx)                          |                |
| <b>Week 12</b>                                 |                                                |                                              |                                            | <b>x.xxx</b>   |
| N                                              | xx                                             | xx                                           | xx                                         |                |
| Mean (SD)                                      | x.xx (xx.x)                                    | x.xx (xx.x)                                  | x.xx (xx.x)                                |                |
| Median (Q1, Q3)                                | x.xx (x.xx, x.xx)                              | x.xx (x.xx, x.xx)                            | x.xx (x.xx, x.xx)                          |                |
| <b>Week 24</b>                                 |                                                |                                              |                                            | <b>x.xxx</b>   |
| N                                              | xx                                             | xx                                           | xx                                         |                |
| Mean (SD)                                      | x.xx (xx.x)                                    | x.xx (xx.x)                                  | x.xx (xx.x)                                |                |
| Median (Q1, Q3)                                | x.xx (x.xx, x.xx)                              | x.xx (x.xx, x.xx)                            | x.xx (x.xx, x.xx)                          |                |
| <b>Borg Scale Pre-Walk Rating (0-10 Range)</b> |                                                |                                              |                                            |                |
| <b>Baseline</b>                                |                                                |                                              |                                            | <b>x.xxx</b>   |
| N                                              | xx                                             | xx                                           | xx                                         |                |
| Mean (SD)                                      | x.xx (xx.x)                                    | x.xx (xx.x)                                  | x.xx (xx.x)                                |                |
| Median (Q1, Q3)                                | x.xx (x.xx, x.xx)                              | x.xx (x.xx, x.xx)                            | x.xx (x.xx, x.xx)                          |                |
| <b>Week 12</b>                                 |                                                |                                              |                                            | <b>x.xxx</b>   |
| N                                              | xx                                             | xx                                           | xx                                         |                |
| Mean (SD)                                      | x.xx (xx.x)                                    | x.xx (xx.x)                                  | x.xx (xx.x)                                |                |
| Median (Q1, Q3)                                | x.xx (x.xx, x.xx)                              | x.xx (x.xx, x.xx)                            | x.xx (x.xx, x.xx)                          |                |
| <b>Week 24</b>                                 |                                                |                                              |                                            | <b>x.xxx</b>   |
| N                                              | xx                                             | xx                                           | xx                                         |                |

**CLEANUP-IPF Study**  
**Final Analysis Table 6.1.1**  
**Exploratory Endpoint**  
**Six Minute Walk Test**  
**Descriptive Summary**

| Parameter<br>Visit<br>Statistic                     | Oral antimicrobial therapy<br>N= NEVAL | Standard Care<br>N= N <sub>EVAL</sub> | All Patients<br>N=N <sub>EVAL</sub> | P-Value |
|-----------------------------------------------------|----------------------------------------|---------------------------------------|-------------------------------------|---------|
| Mean (SD)                                           | x.xx (xx.x)                            | x.xx (xx.x)                           | x.xx (xx.x)                         |         |
| Median (Q1, Q3)                                     | x.xx (x.xx, x.xx)                      | x.xx (x.xx, x.xx)                     | x.xx (x.xx, x.xx)                   |         |
| <b>Borg Scale Post-Walk Rating (0-10<br/>Range)</b> |                                        |                                       |                                     | x.xxx   |
| <b>Baseline</b>                                     |                                        |                                       |                                     | x.xxx   |
| N                                                   | xx                                     | xx                                    | xx                                  |         |
| Mean (SD)                                           | x.xx (xx.x)                            | x.xx (xx.x)                           | x.xx (xx.x)                         |         |
| Median (Q1, Q3)                                     | x.xx (x.xx, x.xx)                      | x.xx (x.xx, x.xx)                     | x.xx (x.xx, x.xx)                   |         |
| <b>Week 12</b>                                      |                                        |                                       |                                     | x.xxx   |
| N                                                   | xx                                     | xx                                    | xx                                  |         |
| Mean (SD)                                           | x.xx (xx.x)                            | x.xx (xx.x)                           | x.xx (xx.x)                         |         |
| Median (Q1, Q3)                                     | x.xx (x.xx, x.xx)                      | x.xx (x.xx, x.xx)                     | x.xx (x.xx, x.xx)                   |         |
| <b>Week 24</b>                                      |                                        |                                       |                                     | x.xxx   |
| N                                                   | xx                                     | xx                                    | xx                                  |         |
| Mean (SD)                                           | x.xx (xx.x)                            | x.xx (xx.x)                           | x.xx (xx.x)                         |         |
| Median (Q1, Q3)                                     | x.xx (x.xx, x.xx)                      | x.xx (x.xx, x.xx)                     | x.xx (x.xx, x.xx)                   |         |
| <b>Six Minute Walk Distance (m)</b>                 |                                        |                                       |                                     | x.xxx   |
| <b>Baseline</b>                                     |                                        |                                       |                                     | x.xxx   |
| N                                                   | xx                                     | xx                                    | xx                                  |         |
| Mean (SD)                                           | x.xx (xx.x)                            | x.xx (xx.x)                           | x.xx (xx.x)                         |         |
| Median (Q1, Q3)                                     | x.xx (x.xx, x.xx)                      | x.xx (x.xx, x.xx)                     | x.xx (x.xx, x.xx)                   |         |
| <b>Week 12</b>                                      |                                        |                                       |                                     | x.xxx   |
| N                                                   | xx                                     | xx                                    | xx                                  |         |
| Mean (SD)                                           | x.xx (xx.x)                            | x.xx (xx.x)                           | x.xx (xx.x)                         |         |

**CLEANUP-IPF Study**  
**Final Analysis Table 6.1.1**  
**Exploratory Endpoint**  
**Six Minute Walk Test**  
**Descriptive Summary**

| <b>Parameter<br/>Visit<br/>Statistic</b> | <b>Oral antimicrobial therapy<br/>N= N<sub>NEVAL</sub></b> | <b>Standard Care<br/>N= N<sub>NEVAL</sub></b> | <b>All Patients<br/>N=N<sub>NEVAL</sub></b> | <b>P-Value</b> |
|------------------------------------------|------------------------------------------------------------|-----------------------------------------------|---------------------------------------------|----------------|
| Median (Q1, Q3)<br><b>Week 24</b>        | x.xx (x.xx, x.xx)                                          | x.xx (x.xx, x.xx)                             | x.xx (x.xx, x.xx)                           | x.xxx          |
| N                                        | xx                                                         | xx                                            | xx                                          |                |
| Mean (SD)                                | x.xx (xx.x)                                                | x.xx (xx.x)                                   | x.xx (xx.x)                                 |                |
| Median (Q1, Q3)                          | x.xx (x.xx, x.xx)                                          | x.xx (x.xx, x.xx)                             | x.xx (x.xx, x.xx)                           |                |

**CLEANUP-IPF Study**  
**Final Analysis Table 6.1.2**  
**Exploratory Endpoint**  
**Six Minute Walk Test**  
**Change from Baseline Summary**

| Parameter<br>Visit<br>Statistic                 | Oral antimicrobial therapy<br>N= NEVAL | Standard Care<br>N= NEVAL | All Patients<br>N=NEVAL | P-Value |
|-------------------------------------------------|----------------------------------------|---------------------------|-------------------------|---------|
| <b>Resting SpO2 (%)</b>                         |                                        |                           |                         |         |
| <b>Week 12</b>                                  |                                        |                           |                         |         |
| N                                               | xx                                     | xx                        | xx                      | x.xxx   |
| Mean (SD)                                       | x.xx (xx.x)                            | x.xx (xx.x)               | x.xx (xx.x)             |         |
| Median (Q1, Q3)                                 | x.xx (x.xx, x.xx)                      | x.xx (x.xx, x.xx)         | x.xx (x.xx, x.xx)       |         |
| <b>Week 24</b>                                  |                                        |                           |                         |         |
| N                                               | xx                                     | xx                        | xx                      | x.xxx   |
| Mean (SD)                                       | x.xx (xx.x)                            | x.xx (xx.x)               | x.xx (xx.x)             |         |
| Median (Q1, Q3)                                 | x.xx (x.xx, x.xx)                      | x.xx (x.xx, x.xx)         | x.xx (x.xx, x.xx)       |         |
| <b>Borg Scale Pre-Walk Rating (0-10 Range)</b>  |                                        |                           |                         |         |
| <b>Week 12</b>                                  |                                        |                           |                         |         |
| N                                               | xx                                     | xx                        | xx                      | x.xxx   |
| Mean (SD)                                       | x.xx (xx.x)                            | x.xx (xx.x)               | x.xx (xx.x)             |         |
| Median (Q1, Q3)                                 | x.xx (x.xx, x.xx)                      | x.xx (x.xx, x.xx)         | x.xx (x.xx, x.xx)       |         |
| <b>Week 24</b>                                  |                                        |                           |                         |         |
| N                                               | xx                                     | xx                        | xx                      | x.xxx   |
| Mean (SD)                                       | x.xx (xx.x)                            | x.xx (xx.x)               | x.xx (xx.x)             |         |
| Median (Q1, Q3)                                 | x.xx (x.xx, x.xx)                      | x.xx (x.xx, x.xx)         | x.xx (x.xx, x.xx)       |         |
| <b>Borg Scale Post-Walk Rating (0-10 Range)</b> |                                        |                           |                         |         |
| <b>Week 12</b>                                  |                                        |                           |                         |         |
| N                                               | xx                                     | xx                        | xx                      | x.xxx   |
| Mean (SD)                                       | x.xx (xx.x)                            | x.xx (xx.x)               | x.xx (xx.x)             |         |
| Median (Q1, Q3)                                 | x.xx (x.xx, x.xx)                      | x.xx (x.xx, x.xx)         | x.xx (x.xx, x.xx)       |         |
| <b>Week 24</b>                                  |                                        |                           |                         |         |
| N                                               | xx                                     | xx                        | xx                      | x.xxx   |
| Mean (SD)                                       | x.xx (xx.x)                            | x.xx (xx.x)               | x.xx (xx.x)             |         |
| Median (Q1, Q3)                                 | x.xx (x.xx, x.xx)                      | x.xx (x.xx, x.xx)         | x.xx (x.xx, x.xx)       |         |

**CLEANUP-IPF Study  
Final Analysis Table 6.1.2  
Exploratory Endpoint  
Six Minute Walk Test  
Change from Baseline Summary**

| Parameter<br>Visit<br>Statistic     | Oral antimicrobial therapy<br>N= NEVAL | Standard Care<br>N= NEVAL | All Patients<br>N=NEVAL | P-Value |
|-------------------------------------|----------------------------------------|---------------------------|-------------------------|---------|
| N                                   | xx                                     | xx                        | xx                      |         |
| Mean (SD)                           | x.xx (xx.x)                            | x.xx (xx.x)               | x.xx (xx.x)             |         |
| Median (Q1, Q3)                     | x.xx (x.xx, x.xx)                      | x.xx (x.xx, x.xx)         | x.xx (x.xx, x.xx)       |         |
| <b>Six Minute Walk Distance (m)</b> |                                        |                           |                         | x.xxx   |
| <b>Week 12</b>                      |                                        |                           |                         | x.xxx   |
| N                                   | xx                                     | xx                        | xx                      |         |
| Mean (SD)                           | x.xx (xx.x)                            | x.xx (xx.x)               | x.xx (xx.x)             |         |
| Median (Q1, Q3)                     | x.xx (x.xx, x.xx)                      | x.xx (x.xx, x.xx)         | x.xx (x.xx, x.xx)       |         |
| <b>Week 24</b>                      |                                        |                           |                         | x.xxx   |
| N                                   | xx                                     | xx                        | xx                      |         |
| Mean (SD)                           | x.xx (xx.x)                            | x.xx (xx.x)               | x.xx (xx.x)             |         |
| Median (Q1, Q3)                     | x.xx (x.xx, x.xx)                      | x.xx (x.xx, x.xx)         | x.xx (x.xx, x.xx)       |         |

860

**CLEANUP-IPF Study  
Final Analysis Table 6.1.3  
Exploratory Endpoint  
Six Minute Walk Test  
Model Analysis**

| Comparison | Estimate with 95% Confidence Interval | Test Statistic | Nominal<br>P-Value |
|------------|---------------------------------------|----------------|--------------------|
|------------|---------------------------------------|----------------|--------------------|

Borg Scale Pre-Walk Rating (0-10 Range)



|                                                            |                      |        |       |
|------------------------------------------------------------|----------------------|--------|-------|
| Slope of Oral antimicrobial therapy                        | xx.xx (xx.xx, xx.xx) | xxx.xx | x.xxx |
| Slope of Standard Care                                     | xx.xx (xx.xx, xx.xx) | xxx.xx | x.xxx |
| Difference of Oral antimicrobial therapy vs. Standard Care | xx.xx (xx.xx, xx.xx) | xx.xx  | x.xxx |
| <b>Borg Scale Post-Walk Rating (0-10 Range)</b>            |                      |        |       |
| Slope of Oral antimicrobial therapy                        | xx.xx (xx.xx, xx.xx) | xxx.xx | x.xxx |
| Slope of Standard Care                                     | xx.xx (xx.xx, xx.xx) | xxx.xx | x.xxx |
| Difference of Oral antimicrobial therapy vs. Standard Care | xx.xx (xx.xx, xx.xx) | xx.xx  | x.xxx |
| <b>Six Minute Walk Distance (m)</b>                        |                      |        |       |
| Slope of Oral antimicrobial therapy                        | xx.xx (xx.xx, xx.xx) | xxx.xx | x.xxx |
| Slope of Standard Care                                     | xx.xx (xx.xx, xx.xx) | xxx.xx | x.xxx |
| Difference of Oral antimicrobial therapy vs. Standard Care | xx.xx (xx.xx, xx.xx) | xx.xx  | x.xxx |

---

862 Addendum to the CleanUP-IPF Analysis Plan (signed 28NOV2016)

863

864 Fernando J. Martinez, Principal Investigator

865 Imre Noth, Principal Investigator

866 Kevin Anstrom, Principal Investigator

867 Jerry Kirchner, Project Leader

868 Eric Yow, Statistician

869

870 29MAY2020

871

872 On 19DEC2019 the DCC received a memorandum from the Executive Secretary of CleanUP-IPF  
873 DSMB regarding the recommendations for investigators of the CleanUP-IPF study following  
874 DSMB meeting 18DEC2019 meeting conference call. The recommendations were to terminate the  
875 trial and proceed with an orderly study close-out. Study PIs and DCC developed and implemented a  
876 plan to complete patient visits and follow-up in March 2020 and database lock by May 2020.

877

878 Beginning in mid-March across the United States stay at home orders were issued due to the  
879 COVID19 pandemic. The stay at home orders limited site PIs and coordinators access to medical  
880 records and other key patient data. The impact of limited access was the following:

- 881 • Entry of some visit data
- 882 • Responses to database queries
- 883 • Collecting and submitting patients records for endpoint adjudication
- 884 • Collecting and submitting patients records for medical monitor review of serious adverse  
885 events and MedDRA coding

886

887 The impact of COVID19 on the data lock and reporting the primary results for publication are the  
888 following:

- 889 • Unable to complete all adjudication of primary endpoint components: death and  
890 hospitalization
- 891 • Entry of serious adverse events and associated term in database to allow MedDRA system  
892 organ class coding

893

894 Given the need to report timely results in the public domain and the unknown end of COVID19  
895 pandemic, the deviation of the primary statistical analysis reporting would be as follows:

- 896 • According to the Statistical Analysis Plan (SAP), the primary analysis of the primary  
897 endpoint was to be based on CEC adjudicated endpoints. Now, the plan is to use  
898 adjudicated results if available. If the CEC adjudicated result is not available then the site  
899 reported result would be used for the endpoint.
- 900 • For serious adverse events, the summary of MedDRA system organ class coding was  
901 planned for the primary statistical analysis and reporting of results. The serious adverse  
902 event analysis would be altered as follows:

- 903                   ○ For events with serious adverse event term entry in the database and MedDRA  
904                   system organ class coding, we will use MedDRA coding.  
905                   ○ For events without serious adverse event term entry in the database and without  
906                   MedDRA system organ class coding, the medical monitor would review the available  
907                   documentation and if reasonable information is available to classify to MedDRA  
908                   system organ class, then the medical monitor result will be used.  
909                   ○ For events without serious adverse event term entry in the database, and no  
910                   MedDRA system organ class coding, and no documentation to support a  
911                   classification by the medical monitor, then the result will not be coded.  
912

913   The primary analysis is based on the final locked dataset and events collected. A sensitivity analysis of the  
914   primary results will be constructed to explore possible differences in snapshots or timeframes of the data.  
915   The results would be censored at date of the DSMB meeting on 17DEC2019 and again at 01MAR2020  
916   (associated with the COVID 19 pandemic) to understand any differences in the data collection affected the  
917   results.

918
