# Supplementary material
Source: PubMed Central journal article supplement (PMC8114133)
Supplement: jama-e214956-s003.pdf [file jama-e214956-s003.pdf]

## Supplemental Online Content

Martinez FJ, Yow E, Flaherty KR, et al; the CleanUP-IPF Investigators of the Pulmonary Trials Cooperative HE. Effect of antimicrobial therapy on respiratory hospitalization or death in adults with idiopathic pulmonary fibrosis: the CleanUP-IPF Randomized Clinical Trial. *JAMA*. doi:10.1001/jama.2021.4956

**eTable 1.** Detailed inclusion and exclusion criteria

**eTable 2.** Pre-specified secondary endpoints

**eTable 3.** Statistical power assuming a sample size of 500 randomized patients

**eTable 4.** Primary endpoint and its components as a function of Clinical Endpoint Committee (CEC) Adjudication or Clinical Site determination

**eTable 5.** Total events and event rates for the primary endpoint and its components as a function of the Clinical Event Adjudication Committee, clinical site and best available determination

**eTable 6.** Multivariable modelling using best available data and multiple imputation for the primary composite and its components

**eTable 7.** Total events and event rates for the primary endpoint by GAP score as a function of the Clinical Event Adjudication Committee, Site Investigator, and Best Available determination

**eTable 8.** Multivariable modelling using multiple imputations for the change from baseline to 12 months in secondary endpoints

**eTable 9.** Serious adverse events and adverse events of special interest by pre randomization cohort

**eFigure 1.** PRECIS-2 Diagram

**eFigure 2.** Enrollment (Actual vs. Projection)

**eFigure 3.** Time to withdrawal from study

**eFigure 4.** Time to first non-elective respiratory hospitalization or death using the Clinical Endpoint Committee adjudicated (Panel A) and Site Investigator (Panel B) determined outcomes

**eFigure 5.** Time to first non-elective respiratory hospitalization or death for the Pre Randomization Co-trimoxazole (Panel A) or Doxycycline (Panel B) Cohorts

**eFigure 6.** Boxplots of FVC at each study visit

**eAppendix.** DSMB Communications

This supplemental material has been provided by the authors to give readers additional information about their work.

**eTable 1. Detailed inclusion and exclusion criteria.**

**Inclusion Criteria**

1. ≥ 40 years of age
2. Diagnosed with IPF by enrolling investigator
3. Signed informed consent

**Exclusion Criteria**

1. Received antimicrobial therapy in the past 30 days for treatment purposes (antibiotic prophylaxis for procedures do not meet criteria, nor do antivirals)
2. Contraindicated for antibiotic therapy, including but not exclusive to:
  - a. Allergy or intolerance to BOTH tetracyclines AND trimethoprim, sulfonamides or their combination
  - b. Allergy or intolerance to tetracyclines AND known potassium level > 5 mEq/L in the past 90 days.
    - i. If the enrolling physician feels the potassium level has normalized, documentation to that effect must be provided.
  - c. Allergy or intolerance to tetracyclines AND concomitant use of angiotensin converting enzyme inhibitor (ACEI), angiotensin receptor blocker (ARB), potassium sparing diuretic, dofetilide, methotrexate, azathioprine, mycophenolate mofetil, cyclophosphamide
  - d. Allergy or intolerance to tetracyclines AND known glucose-6-phosphate dehydrogenase deficiency
  - e. Allergy or intolerance to tetracyclines AND untreated folate or B12 deficiency
  - f. Allergy or intolerance to tetracyclines AND known renal insufficiency (defined as a GFR < 30 ml/min within the previous 90 days)
    - i. If the enrolling physician feels the renal dysfunction has resolved, documentation to that effect must be provided.
  - g. Seizure disorder on antiepileptic therapy.
3. Pregnant (as determined by urine dipstick pregnancy test at randomization), or anticipate becoming pregnant
4. Use of an investigational study agent for IPF therapy within the past 30 days, or an IV infusion with a half-life of four (4) weeks
5. Concomitant immunosuppression with azathioprine, mycophenolate, cyclophosphamide, or cyclosporine.

**eTable 2. Pre-specified secondary endpoints.**

- Time to death from any cause
- Time to first non-elective, respiratory hospitalization
- Time to first non-elective, all-cause hospitalization
- Total number of non-elective respiratory hospitalizations
- Total number of non-elective all-cause hospitalizations
- Change in FVC from randomization to 12 months
- Change in DLCO from randomization to 12 months
- Total number of respiratory infections
- UCSD-Shortness of Breath Questionnaire at 12 months
- Fatigue Severity Scale score at 12 months
- Leicester Cough Questionnaire score at 12 months
- EQ-5D score and SF-12 score at 12 months
- ICEpop CAPability measure for Older people score at 12 months

**eTable 3. Statistical power assuming a sample size of 500 randomized patients**

| Usual care plus antimicrobial therapy event rate* | Usual care event rate | One-year Event Rate Reduction | Power |
|---------------------------------------------------|-----------------------|-------------------------------|-------|
| 16.8%                                             | 24%                   | 30%                           | 78%   |
| 21.0%                                             | 30%                   | 30%                           | 87%   |
| 25.2%                                             | 36%                   | 30%                           | 93%   |
| 16.0%                                             | 24%                   | 33.3%                         | 86%   |
| 20.0%                                             | 30%                   | 33.3%                         | 93%   |
| 24.0%                                             | 36%                   | 33.3%                         | 97%   |
| 15.6%                                             | 24%                   | 35%                           | 89%   |
| 19.5%                                             | 30%                   | 35%                           | 95%   |
| 23.4%                                             | 36%                   | 35%                           | 98%   |

\*12-month event rates. Calculations assume a 2-sided Type-I error rate of 0.05. The minimum follow-up is planned to be 12 months and the maximum follow-up is 42 months. Drop-out rates are assumed to be approximately 2% per year. Power calculations were based on a log-rank test with assumed event rates were exponentially distributed. Calculations were computing using nQuery 7.0 software.

**eTable 4. Primary endpoint and its components as a function of Clinical Endpoint Committee (CEC) Adjudication or Clinical Site determination.**

| Event                                                           | Usual care plus antimicrobial therapy strategy (n=254) | Usual Care (n=259) | Hazard Ratio with 95% Confidence Intervals |
|-----------------------------------------------------------------|--------------------------------------------------------|--------------------|--------------------------------------------|
| <b>Primary endpoint (CEC)</b>                                   |                                                        |                    |                                            |
| Death or first non-elective, respiratory hospitalization, n (%) | 52 (20.5%)                                             | 56 (21.6%)         | 1.04 (0.71, 1.53)                          |
| <b>Primary endpoint (Site Investigator)</b>                     |                                                        |                    |                                            |
| Death or first non-elective, respiratory hospitalization, n (%) | 52 (20.5%)                                             | 55 (21.2%)         | 1.06 (0.72, 1.56)                          |
| <b>Primary endpoint components (CEC)</b>                        |                                                        |                    |                                            |
| Death, n (%)                                                    | 37 (14.6%)                                             | 37 (14.3%)         | 1.11 (0.70, 1.78)                          |
| First non-elective, respiratory hospitalization, n (%)          | 36 (14.2%)                                             | 30 (11.6%)         | 1.11 (0.70, 1.78)                          |
| <b>Primary endpoint components (Site Investigator)</b>          |                                                        |                    |                                            |
| Death, n (%)                                                    | 37 (14.6%)                                             | 37 (14.3%)         | 1.39 (0.85, 2.27)                          |
| First non-elective, respiratory hospitalization, n (%)          | 38 (15.0%)                                             | 29 (11.2%)         | 1.49 (0.91, 2.43)                          |

**eTable 5. Total events and event rates for the primary endpoint and its components as a function of the Clinical Event Adjudication Committee, clinical site and best available determination.**

| Event                                           | Clinical Adjudication Committee | Clinical Site | Best Available |
|-------------------------------------------------|---------------------------------|---------------|----------------|
| <b>Composite Primary Endpoint</b>               |                                 |               |                |
| Total number of events                          | 108                             | 107           | 108            |
| Follow-up (years)                               | 559.3                           | 560.6         | 559.1          |
| Rate, events/year                               | 0.118                           | 0.191         | 0.193          |
| <b>Primary endpoint Components</b>              |                                 |               |                |
| <b>Death</b>                                    |                                 |               |                |
| Total number of events                          | 74                              | 74            | 74             |
| Follow-up (years)                               | 593.6                           | 593.6         | 593.6          |
| Rate, events/year                               | 0.125                           | 0.125         | 0.125          |
| <b>Non-elective respiratory hospitalization</b> |                                 |               |                |
| Total number of events                          | 66                              | 67            | 67             |
| Follow-up (years)                               | 559.3                           | 560.6         | 559.1          |
| Rate, events/year                               | 0.118                           | 0.120         | 0.120          |

**eTable 6. Multivariable modelling using best available data and multiple imputation for the primary composite and its components.**

| Composite endpoint or its component                                            | Hazard Ratio Estimate<br>(95% CI) | P-value |
|--------------------------------------------------------------------------------|-----------------------------------|---------|
| <b>Time to death or 1<sup>st</sup> nonelective respiratory hospitalization</b> |                                   |         |
| Antimicrobial therapy + usual care vs usual care*                              | 1.04 (0.71, 1.53)                 | 0.83    |
| Age (per 10 years)                                                             | 1.06 (0.80, 1.42)                 | 0.69    |
| Female                                                                         | 0.85 (0.51, 1.42)                 | 0.53    |
| Baseline DL <sub>co</sub> %pred (per 10 percentage points)                     | 0.69 (0.57, 0.82)                 | <0.001  |
| Baseline FVC %pred (per 10 percentage points)                                  | 0.86 (0.75, 0.98)                 | 0.002   |
| NAC use at enrollment                                                          | 1.93 (1.03, 3.63)                 | 0.04    |
| Pirfenidone at enrollment                                                      | 1.14 (0.68, 1.91)                 | 0.62    |
| Nintedanib at enrollment                                                       | 1.23 (0.74, 2.04)                 | 0.43    |
| Pre-randomization co-trimoxazole cohort                                        | 0.88 (0.59, 1.31)                 | 0.53    |
| <b>Time to death</b>                                                           |                                   |         |
| Antimicrobial therapy + usual care vs usual care                               | 1.11 (0.70, 1.78)                 | 0.65    |
| Age (per 10 years)                                                             | 1.10 (0.78, 1.58)                 | 0.56    |
| Female                                                                         | 0.78 (0.41, 1.50)                 | 0.46    |
| Baseline DL <sub>co</sub> %pred (per 10 percentage points)                     | 0.65 (0.53, 0.81)                 | <0.001  |
| Baseline FVC %pred (per 10 percentage points)                                  | 0.87 (0.75, 1.02)                 | 0.08    |
| NAC use at enrollment                                                          | 1.73 (0.78, 3.81)                 | 0.18    |
| Pirfenidone at enrollment                                                      | 1.04 (0.55, 1.97)                 | 0.90    |
| Nintedanib at enrollment                                                       | 1.10 (0.59, 2.05)                 | 0.78    |
| Pre-randomization co-trimoxazole cohort                                        | 0.91 (0.56, 1.46)                 | 0.69    |
| <b>Time to 1<sup>st</sup> nonelective respiratory hospitalization</b>          |                                   |         |
| Antimicrobial therapy + usual care vs usual care                               | 1.34 (0.82, 2.17)                 | 0.25    |
| Age (per 10 years)                                                             | 1.11 (0.77, 1.59)                 | 0.58    |
| Female                                                                         | 0.75 (0.38, 1.48)                 | 0.40    |
| Baseline DL <sub>co</sub> %pred (per 10 percentage points)                     | 0.73 (0.58, 0.91)                 | 0.006   |
| Baseline FVC %pred (per 10 percentage points)                                  | 0.88 (0.75, 1.03)                 | 0.11    |
| NAC use at enrollment                                                          | 1.40 (0.56, 3.59)                 | 0.48    |
| Pirfenidone at enrollment                                                      | 1.10 (0.58, 2.11)                 | 0.77    |
| Nintedanib at enrollment                                                       | 1.18 (0.62, 2.23)                 | 0.62    |
| Pre-randomization co-trimoxazole cohort                                        | 0.93 (0.56, 1.53)                 | 0.77    |

NAC – N-acetylcysteine

\*A sensitivity analysis using the robust sandwich estimate of Lin and Wei (1989) for the covariance matrix resulted in an adjusted hazard ratio of 1.05, 95%CI 0.72, 1.54.for antimicrobial therapy + usual care vs. usual care alone.

**eTable 7. Total events and event rates for the primary endpoint by GAP score as a function of the Clinical Event Adjudication Committee, Site Investigator, and Best Available determination.**

| Event                  | Clinical Adjudication Committee | Clinical Site | Best Available |
|------------------------|---------------------------------|---------------|----------------|
| <b>GAP I (n=114)</b>   |                                 |               |                |
| Total number of events | 11                              | 12            | 11             |
| Follow-up (years)      | 133.2                           | 133           | 133.2          |
| Rate, events/year      | 0.083                           | 0.09          | 0.083          |
| <b>GAP II (n=257)</b>  |                                 |               |                |
| Total number of events | 49                              | 51            | 49             |
| Follow-up (years)      | 292.1                           | 289.76        | 291.9          |
| Rate, events/year      | 0.168                           | 0.176         | 0.168          |
| <b>GAP III (n=113)</b> |                                 |               |                |
| Total number of events | 39                              | 37            | 39             |
| Follow-up (years)      | 309.3                           | 113.6         | 111.8          |
| Rate, events/year      | 0.349                           | 0.326         | 0.349          |



**eTable 8. Multivariable modelling using multiple imputations for the change from baseline to 12 months in secondary endpoints.**

| Physiological endpoint                                     | Estimate (95% CI)    | P-value |
|------------------------------------------------------------|----------------------|---------|
| <b>FVC (L)</b>                                             |                      |         |
| Antimicrobial therapy + usual care vs usual care           | 0.04 (-0.02, 0.10)   | 0.22    |
| Age (per 10 years)                                         | 0.01 (-0.04, 0.05)   | 0.85    |
| Female                                                     | 0.02 (-0.06, 0.10)   | 0.63    |
| Baseline DL <sub>co</sub> %pred (per 10 percentage points) | 0.01 (-0.01, 0.04)   | 0.31    |
| Baseline FVC %pred (per 10 percentage points)              | -0.03 (-0.05, -0.00) | 0.02    |
| NAC use at enrollment                                      | -0.07 (-0.13, 0.04)  | 0.32    |
| Pirfenidone at enrollment                                  | -0.04 (-0.13, 0.04)  | 0.32    |
| Nintedanib at enrollment                                   | 0.02 (-0.07, 0.11)   | 0.61    |
| Pre-randomization co-trimoxazole cohort                    | 0.05 (-0.12, 0.01)   | 0.12    |
| <b>DLCO corrected for hemoglobin (mL/min/mmHg)</b>         |                      |         |
| Antimicrobial therapy + usual care vs usual care           | 0.35 (-0.53, 1.05)   | 0.33    |
| Age (per 10 years)                                         | 0.14 (-0.63, 0.35)   | 0.57    |
| Female                                                     | 0.08 (-0.73, 0.88)   | 0.86    |
| Baseline DL <sub>co</sub> %pred (per 10 percentage points) | 0.25 (-0.52, 0.03)   | 0.08    |
| Baseline FVC %pred (per 10 percentage points)              | 0.21 (-0.03, 0.44)   | 0.08    |
| NAC use at enrollment                                      | 1.86 (-3.21, -0.50)  | 0.007   |
| Pirfenidone at enrollment                                  | 0.54 (-0.57, 1.37)   | 0.27    |
| Nintedanib at enrollment                                   | 0.40 (-0.57, 1.37)   | 0.42    |
| Pre-randomization co-trimoxazole cohort                    | 0.65 (-1.36, 0.06)   | 0.07    |
| <b>UCSD Shortness of Breath Questionnaire</b>              |                      |         |
| Antimicrobial therapy + usual care vs usual care           | -0.59 (-4.62, 3.43)  | 0.77    |
| Age (per 10 years)                                         | 0.57 (-2.38, 3.52)   | 0.70    |
| Female                                                     | -3.02 (-8.05, 2.02)  | 0.24    |
| Baseline DL <sub>co</sub> %pred (per 10 percentage points) | -0.33 (-2.02, 1.37)  | 0.70    |
| Baseline FVC %pred (per 10 percentage points)              | -0.89 (-2.22, 0.43)  | 0.19    |
| NAC use at enrollment                                      | -0.09 (-8.09, 7.91)  | 0.98    |
| Pirfenidone at enrollment                                  | 4.68 (-0.77, 10.12)  | 0.09    |
| Nintedanib at enrollment                                   | 1.43 (-4.01, 6.87)   | 0.61    |
| Pre-randomization co-trimoxazole cohort                    | 1.58 (-2.57, 5.73)   | 0.46    |
| <b>Fatigue Severity Score</b>                              |                      |         |
| Antimicrobial therapy + usual care vs usual care           | 0.10 (-0.26, 0.46)   | 0.59    |
| Age (per 10 years)                                         | 0.01 (-0.25, 0.28)   | 0.93    |
| Female                                                     | 0.07 (-0.38, 0.51)   | 0.78    |
| Baseline DL <sub>co</sub> %pred (per 10 percentage points) | 0.03 (-0.11, 0.18)   | 0.65    |
| Baseline FVC %pred (per 10 percentage points)              | -0.89 (-2.22, 0.43)  | 0.63    |
| NAC use at enrollment                                      | 0.58 (-0.12, 1.29)   | 0.98    |
| Pirfenidone at enrollment                                  | -0.09 (-0.57, 0.40)  | 0.72    |
| Nintedanib at enrollment                                   | 0.08 (-0.41, 0.56)   | 0.61    |
| Pre-randomization co-trimoxazole cohort                    | -0.13 (-0.50, 0.24)  | 0.49    |
| <b>Leicester Cough Questionnaire</b>                       |                      |         |
| Antimicrobial therapy + usual care vs usual care           | 0.01 (-0.82, 0.80)   | 0.98    |

| <b>Physiological endpoint</b>                              | <b>Estimate (95% CI)</b> | <b>P-value</b> |
|------------------------------------------------------------|--------------------------|----------------|
| Age (per 10 years)                                         | 0.17 (-0.77, 0.43)       | 0.58           |
| Female                                                     | 0.32 (-0.70, 1.34)       | 0.54           |
| Baseline DL <sub>co</sub> %pred (per 10 percentage points) | 0.06 (-0.40, 0.28)       | 0.73           |
| Baseline FVC %pred (per 10 percentage points)              | 0.08 (-0.18, 0.35)       | 0.54           |
| NAC use at enrollment                                      | 0.25 (-1.36, 1.85)       | 0.77           |
| Pirfenidone at enrollment                                  | 0.69 (-1.78, 0.40)       | 0.21           |
| Nintedanib at enrollment                                   | 0.59 (-1.67, 0.50)       | 0.29           |
| Pre-randomization co-trimoxazole cohort                    | 0.03 (-0.80, 0.87)       | 0.94           |
| <b>EuroQol Index Score</b>                                 |                          |                |
| Antimicrobial therapy + usual care vs usual care           | 0.007 (-0.04, 0.05)      | 0.75           |
| Age (per 10 years)                                         | -0.003 (-0.03, 0.03)     | 0.87           |
| Female                                                     | 0.002 (-0.05, 0.68)      | 0.94           |
| Baseline DL <sub>co</sub> %pred (per 10 percentage points) | 0.003 (-0.02, 0.02)      | 0.78           |
| Baseline FVC %pred (per 10 percentage points)              | 0.019 (0.005, 0.03)      | 0.008          |
| NAC use at enrollment                                      | 0.01 (-0.08, 0.10)       | 0.79           |
| Pirfenidone at enrollment                                  | -0.01 (-0.07, 0.05)      | 0.68           |
| Nintedanib at enrollment                                   | 0.003 (-0.06, 0.06)      | 0.93           |
| Pre-randomization co-trimoxazole cohort                    | 0.006 (-0.04, 0.05)      | 0.80           |
| <b>SF12 mental score</b>                                   |                          |                |
| Antimicrobial therapy + usual care vs usual care           | 0.46 (-1.45, 2.37)       | 0.64           |
| Age (per 10 years)                                         | -0.17 (-1.57, 1.23)      | 0.82           |
| Female                                                     | -1.37 (-3.75, 1.02)      | 0.26           |
| Baseline DL <sub>co</sub> %pred (per 10 percentage points) | 0.37 (-0.41, 1.15)       | 0.35           |
| Baseline FVC %pred (per 10 percentage points)              | 0.33 (-0.30, 0.96)       | 0.31           |
| NAC use at enrollment                                      | 0.18 (-3.70, 4.06)       | 0.93           |
| Pirfenidone at enrollment                                  | -2.60 (-5.16, -0.03)     | 0.05           |
| Nintedanib at enrollment                                   | -1.87 (-4.44, 0.71)      | 0.16           |
| Pre-randomization co-trimoxazole cohort                    | -0.73 (-2.70, 1.24)      | 0.47           |
| <b>SF14 physical score</b>                                 |                          |                |
| Antimicrobial therapy + usual care vs usual care           | 0.46 (-1.18, 2.10)       | 0.58           |
| Age (per 10 years)                                         | 0.49 (-0.72, 1.69)       | 0.43           |
| Female                                                     | -0.19 (-2.23, 1.85)      | 0.85           |
| Baseline DL <sub>co</sub> %pred (per 10 percentage points) | 0.24 (-0.44, 0.91)       | 0.49           |
| Baseline FVC %pred (per 10 percentage points)              | 0.09 (-0.45, 0.64)       | 0.74           |
| NAC use at enrollment                                      | -1.50 (-4.83, 1.82)      | 0.38           |
| Pirfenidone at enrollment                                  | 1.30 (-0.89, 3.51)       | 0.24           |
| Nintedanib at enrollment                                   | 1.81 (-0.39, 4.02)       | 0.11           |
| Pre-randomization co-trimoxazole cohort                    | -1.59 (-3.28, 0.11)      | 0.07           |
| <b>ICECAP-O</b>                                            |                          |                |
| Antimicrobial therapy + usual care vs usual care           | 0.01 (-0.03, 0.05)       | 0.64           |
| Age (per 10 years)                                         | -0.03 (-0.06, 0.001)     | 0.06           |
| Female                                                     | -0.03 (-0.08, 0.03)      | 0.34           |
| Baseline DL <sub>co</sub> %pred (per 10 percentage points) | -0.002 (-0.019, 0.015)   | 0.85           |
| Baseline FVC %pred (per 10 percentage points)              | -0.01 (-0.02, 0.01)      | 0.32           |
| NAC use at enrollment                                      | -0.02 (-0.10, 0.06)      | 0.60           |

| <b>Physiological endpoint</b>           | <b>Estimate (95% CI)</b> | <b>P-value</b> |
|-----------------------------------------|--------------------------|----------------|
| Pirfenidone at enrollment               | 0.003 (-0.05, 0.06)      | 0.91           |
| Nintedanib at enrollment                | -0.03 (0.08, 0.03)       | 0.39           |
| Pre-randomization co-trimoxazole cohort | -0.01 (-0.05, 0.03)      | 0.71           |

NAC – N-acetylcysteine

**eTable 9. Serious adverse events and adverse events of special interest by pre-randomization cohort.**

|                                           | Pre-randomization<br>Co-trimozazole Cohort          |                          | Pre-randomization<br>Doxycycline Cohort             |                          |
|-------------------------------------------|-----------------------------------------------------|--------------------------|-----------------------------------------------------|--------------------------|
|                                           | Antimicrobial<br>Therapy +<br>Usual Care<br>(n=128) | Usual<br>Care<br>(n=144) | Antimicrobial<br>Therapy +<br>Usual Care<br>(n=126) | Usual<br>Care<br>(n=115) |
| <b>Serious Adverse Events*</b>            |                                                     |                          |                                                     |                          |
| Any SAE                                   | 36 (28.1%)                                          | 37 (25.7%)               | 35 (27.8%)                                          | 28 (24.3%)               |
| Respiratory, thoracic and mediastinal     | 22 (17.2%)                                          | 15 (10.4%)               | 20 (15.9%)                                          | 11 (9.6%)                |
| Idiopathic Pulmonary Fibrosis             | 12 (9.4%)                                           | 4 (2.8%)                 | 4 (3.2%)                                            | 1 (0.9%)                 |
| Dyspnea                                   | 1 (0.8%)                                            | 1 (0.7%)                 | 4 (3.2%)                                            | 1 (0.9%)                 |
| Respiratory failure                       | 4 (3.1%)                                            | 3 (2.1%)                 | 1 (0.8%)                                            | 1 (0.9%)                 |
| Cardiovascular                            | 5 (3.9%)                                            | 5 (3.5%)                 | 6 (4.8%)                                            | 6 (5.2%)                 |
| Infections                                | 2 (1.6%)                                            | 12 (8.3%)                | 5 (4.0%)                                            | 5 (4.3%)                 |
| Pneumonia                                 | 2 (1.6%)                                            | 5 (3.5%)                 | 3 (2.4%)                                            | 2 (1.7%)                 |
| Nervous System                            | 1 (0.8%)                                            | 2 (1.4%)                 | 7 (5.6%)                                            | 1 (0.9%)                 |
| Syncope                                   | 0 (0%)                                              | 0 (0%)                   | 3 (2.4%)                                            | 0 (0%)                   |
| Loss of consciousness                     | 0 (0%)                                              | 0 (0%)                   | 2 (1.6%)                                            | 0 (0%)                   |
| Gastrointestinal                          | 0 (0%)                                              | 3 (2.1%)                 | 3 (2.4%)                                            | 1 (0.9%)                 |
| Metabolism and nutrition                  | 1 (0.8%)                                            | 3 (2.1%)                 | 1 (0.8%)                                            | 1 (0.9%)                 |
| <b>Adverse Events of Special Interest</b> |                                                     |                          |                                                     |                          |
| Arrhythmia                                | 1 (0.8%)                                            | 2 (1.4%)                 | 1 (0.8%)                                            | 3 (2.6%)                 |
| Vomiting                                  | 6 (4.7%)                                            | 1 (0.7%)                 | 6 (4.8%)                                            | 1 (0.9%)                 |
| Hyperkalemia                              | 9 (7.0%)                                            | 2 (1.4%)                 | 1 (0.8%)                                            | 0 (0%)                   |
| Rash                                      | 11 (8.6%)                                           | 0 (0%)                   | 6 (4.8%)                                            | 0 (0%)                   |
| Diarrhea                                  | 8 (6.3%)                                            | 3 (2.1%)                 | 18 (14.3%)                                          | 5 (4.3%)                 |

\*Specific SAEs occurring in more than 1% of the population are reported.

**eFigure 1. PRECIS-2 diagram**

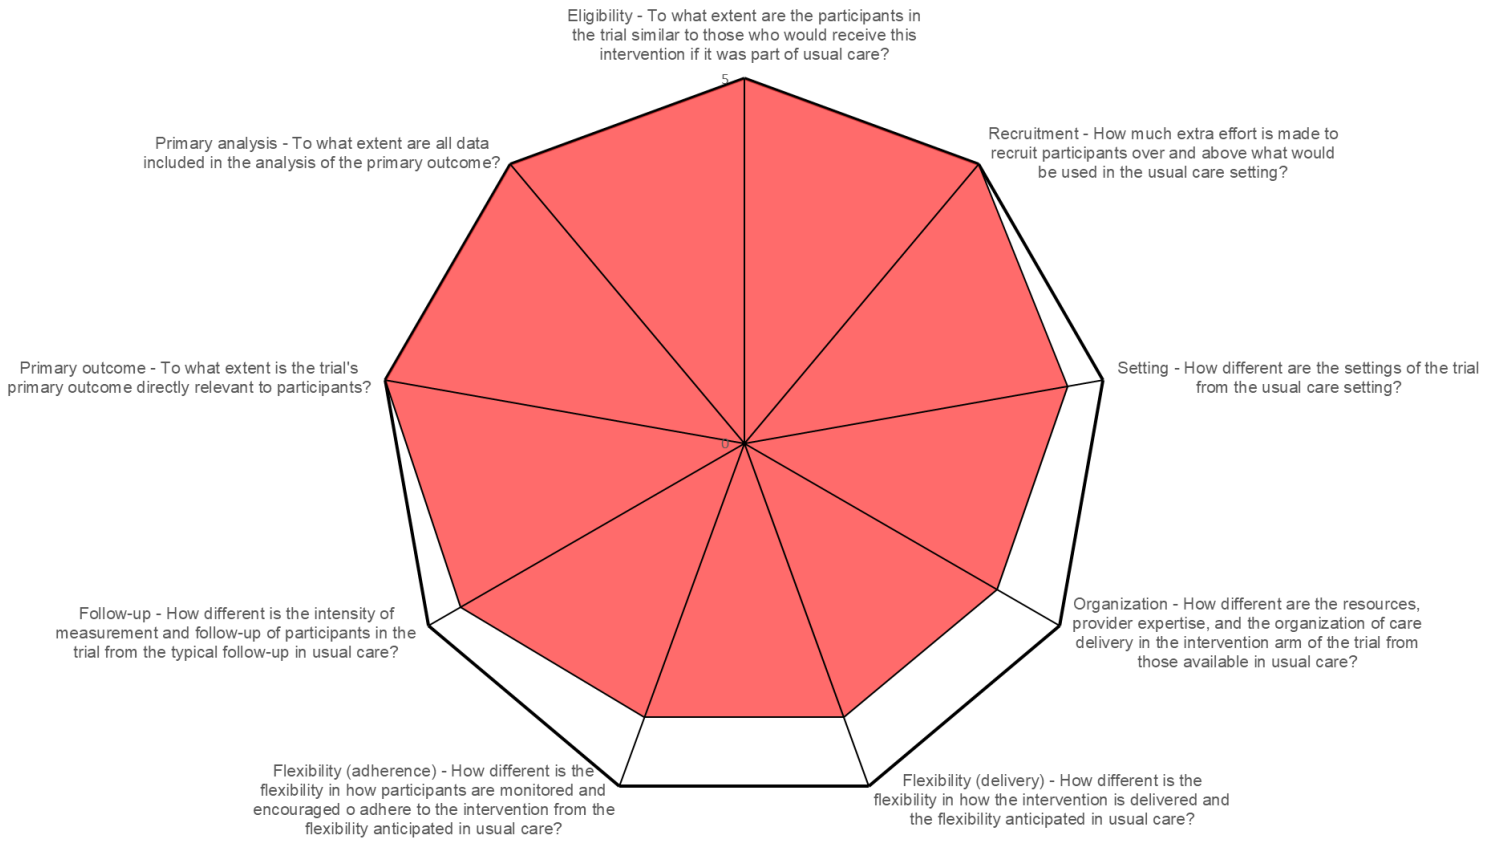

eFigure 2. Enrollment (Actual vs. Projection).

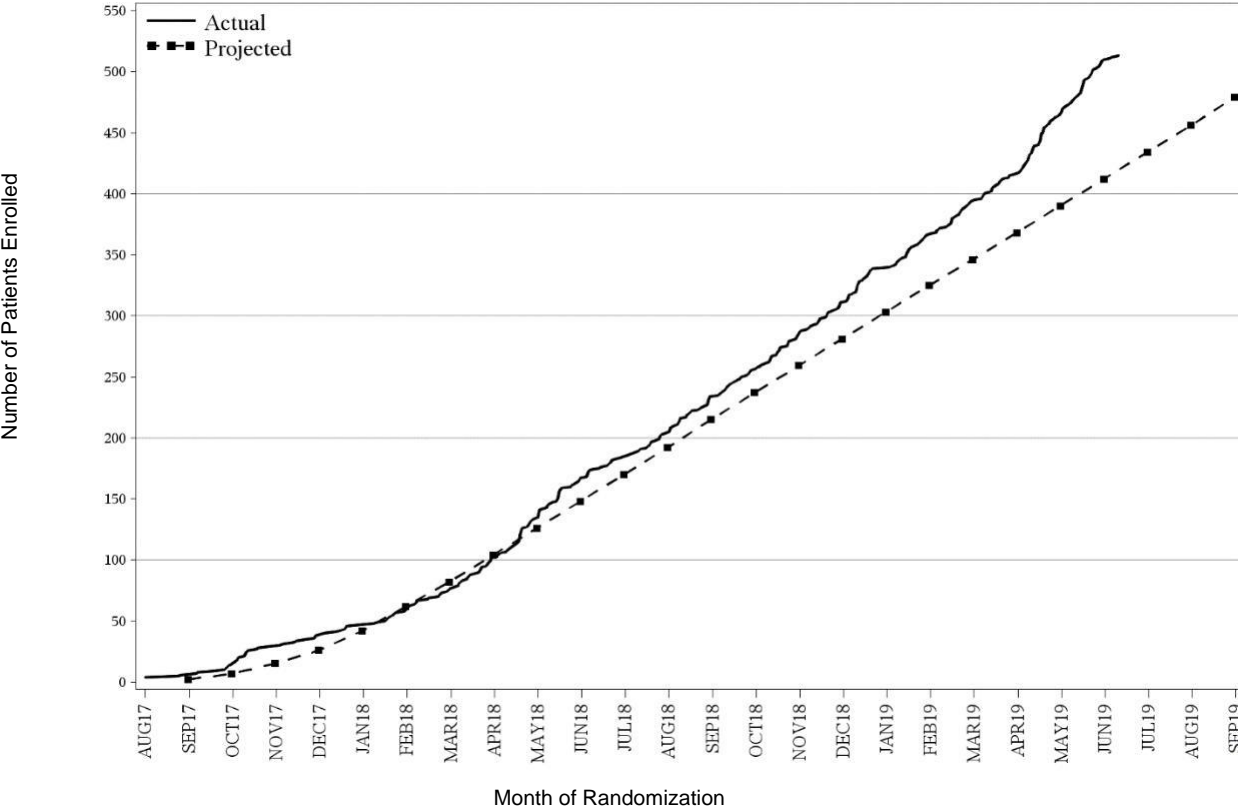

**eFigure 3. Time to withdrawal from study.**

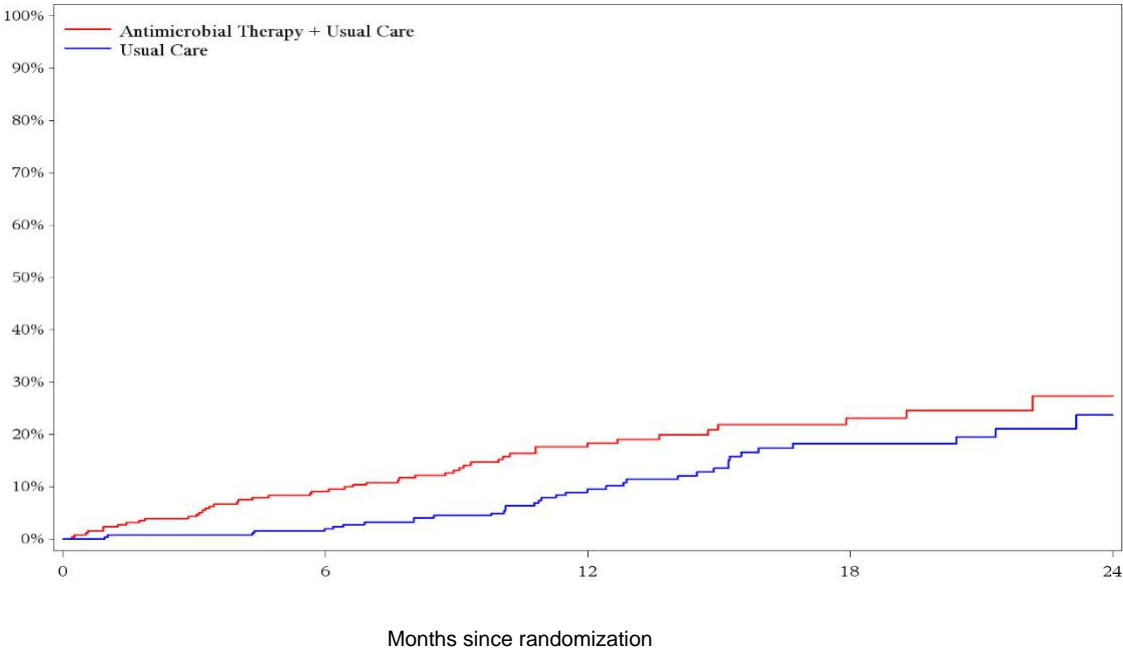

|    |     |     |     |    |    |
|----|-----|-----|-----|----|----|
| AT | 254 | 221 | 116 | 59 | 15 |
| SC | 259 | 239 | 154 | 85 | 23 |

**eFigure 4. Time to first non-elective respiratory hospitalization or death using the Clinical Endpoint Committee adjudicated (Panel A) and Site Investigator (Panel B) determined outcomes.**

**A.**

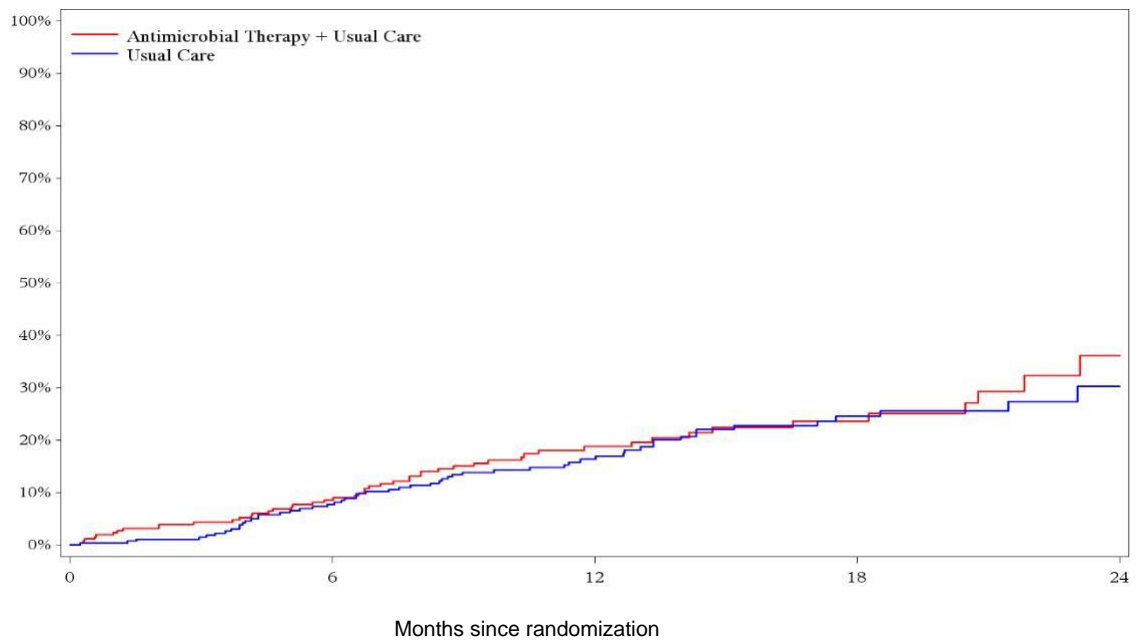

|    |     |     |     |    |    |
|----|-----|-----|-----|----|----|
| AT | 254 | 213 | 108 | 53 | 13 |
| SC | 259 | 232 | 147 | 77 | 17 |



B.

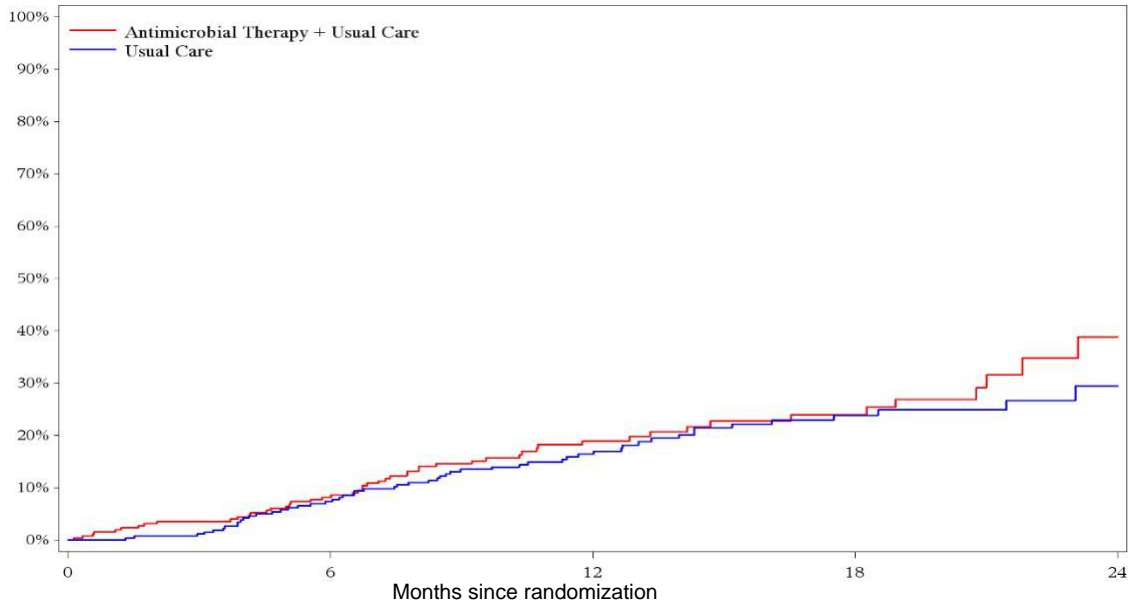

|    |     |     |     |    |    |
|----|-----|-----|-----|----|----|
| AT | 254 | 215 | 108 | 53 | 11 |
| SC | 259 | 233 | 148 | 78 | 18 |

**eFigure 5. Time to first non-elective respiratory hospitalization or death for the Pre-Randomization Co-trimoxazole (Panel A) or Doxycycline (Panel B) Cohorts.**

**A.**

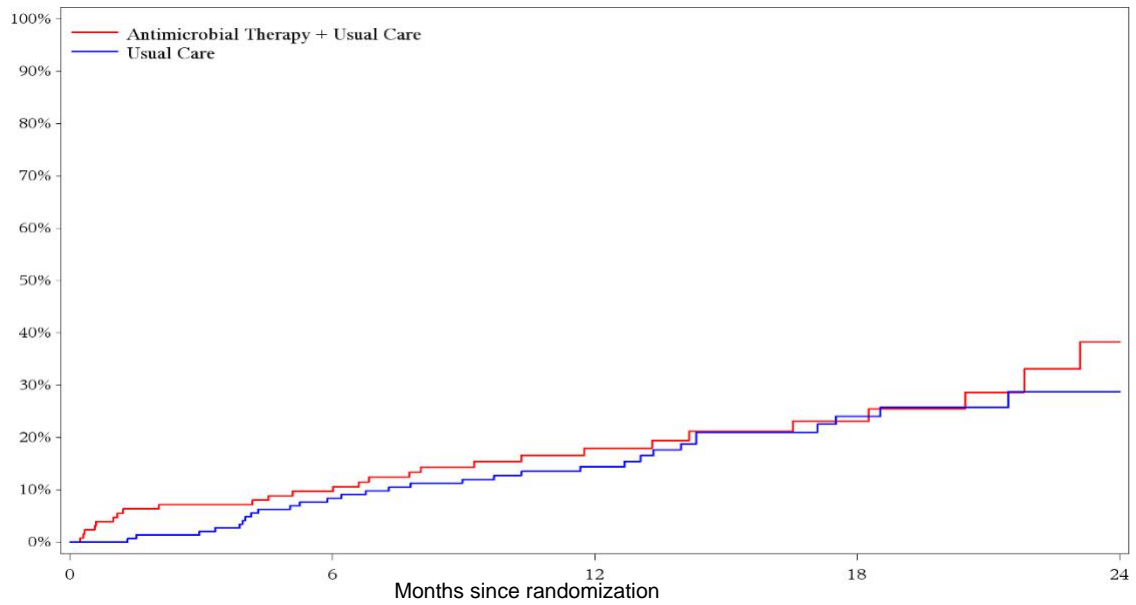

|    |     |     |    |    |    |
|----|-----|-----|----|----|----|
| AT | 128 | 104 | 59 | 33 | 10 |
| SC | 144 | 129 | 91 | 46 | 13 |

B.

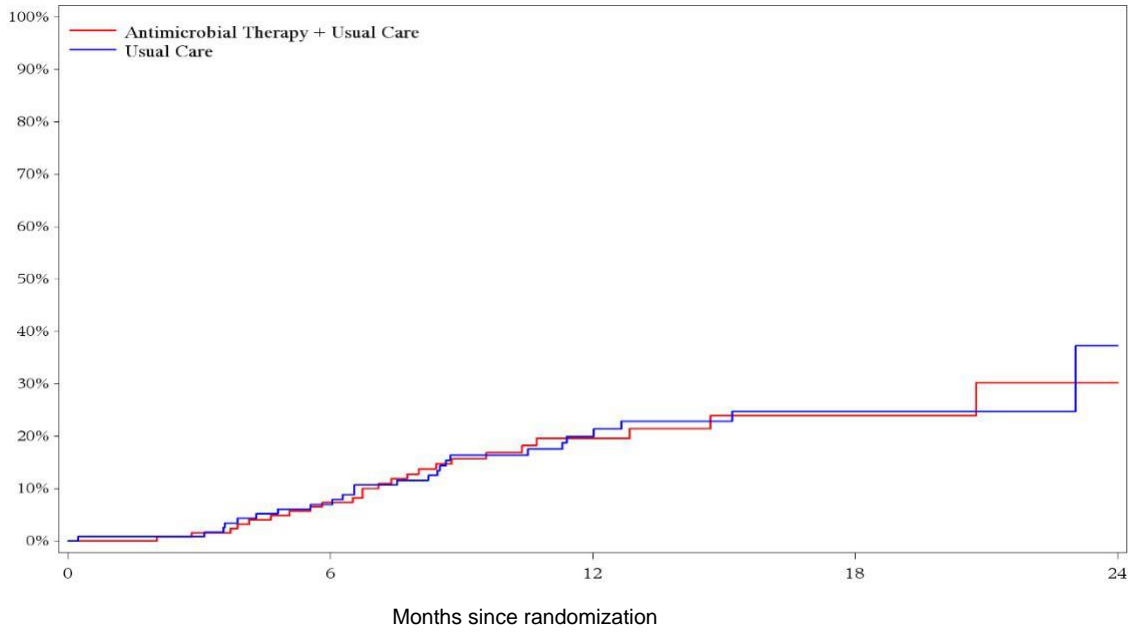

|    |     |     |    |    |   |
|----|-----|-----|----|----|---|
| AT | 126 | 109 | 49 | 20 | 3 |
| SC | 115 | 103 | 55 | 31 | 4 |

**eFigure 6. Boxplots of FVC at each Study Visit**

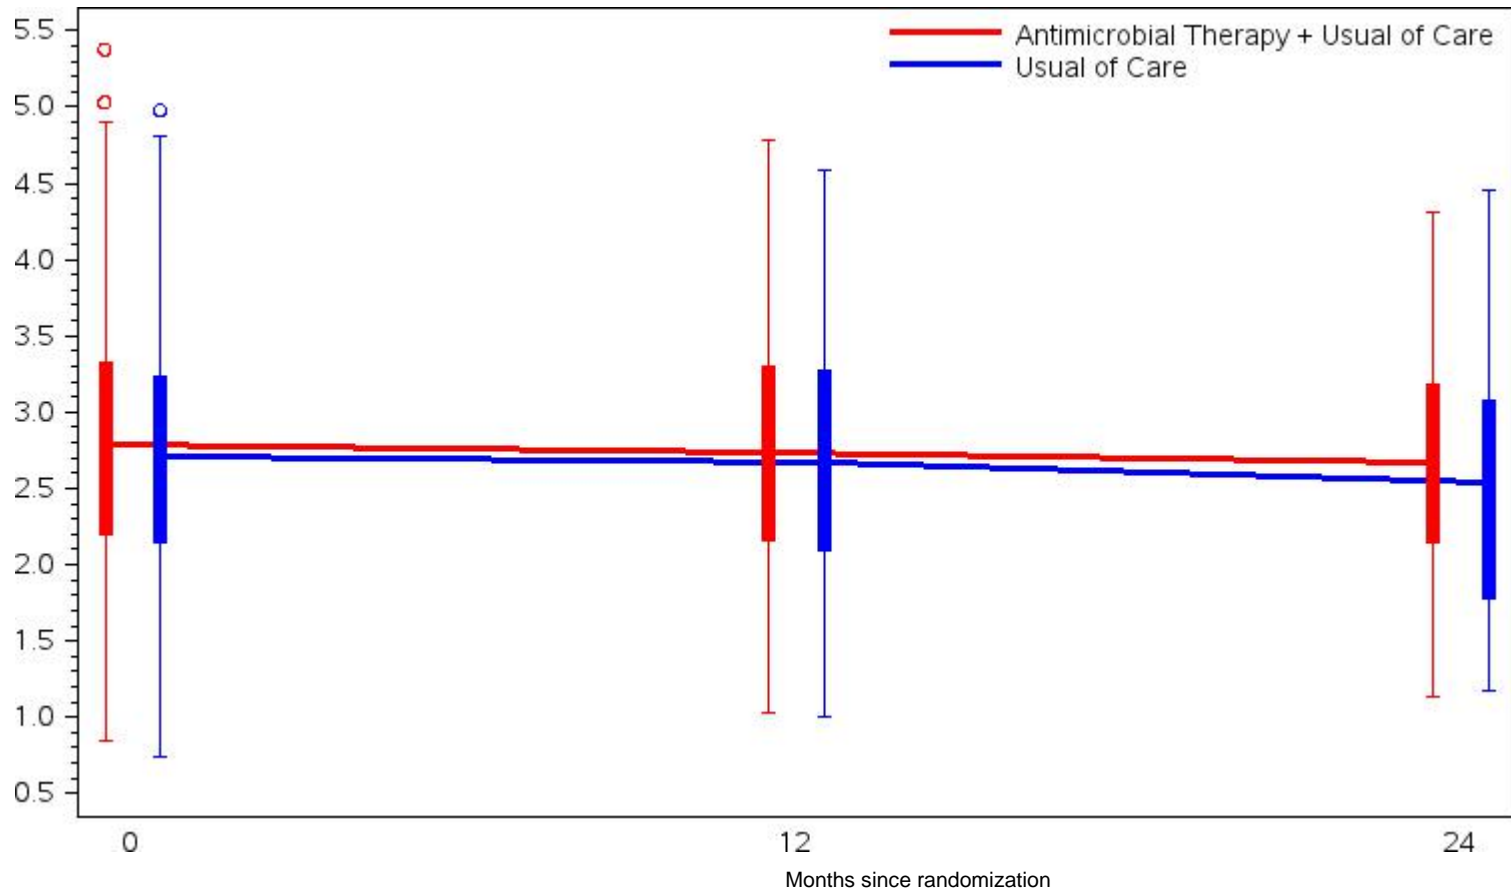

Number of Patients

|    |     |     |    |
|----|-----|-----|----|
| AT | 247 | 148 | 53 |
| SC | 255 | 168 | 69 |

**Supplemental Appendix 4**  
**DSMB Communications**

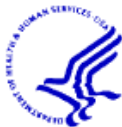

DEPARTMENT OF HEALTH &amp; HUMAN SERVICES

Public Health Service

---

National Institutes of Health  
National Heart, Lung, and  
Blood Institute  
Bethesda, Maryland 20892

December 19, 2019

Fernando Martinez, MD  
PI, CleanUP-IPF Trial  
Weill Cornell Medical College  
525 East 68<sup>th</sup> Street, Room M-522  
New York, NY 10065

Kevin Anstrom, PhD  
PI, CleanUP-IPF Trial  
Duke University School of Medicine  
200 Morris Street  
6320 200 Morris  
Durham, NC 27701

Dear Drs. Martinez and Anstrom:

The purpose of this letter is to document formally the National Heart, Lung, and Blood Institute's (NHLBI) decision for early termination of the Study of Clinical Efficacy of Antimicrobial Therapy Strategy Using Pragmatic Design in Idiopathic Pulmonary Fibrosis (CleanUP-IPF) within the Pulmonary Trials Cooperative (PTC). This decision was informed by the recommendation of the Data and Safety Monitoring Board (DSMB) and subsequent NHLBI review as described below.

The DSMB met on December 18, 2019 to review the first planned efficacy analysis for CleanUp-IPF, and unanimously voted to terminate the study early for futility and to proceed with an orderly close-out. This determination was based on the low likelihood of the study demonstrating a statistically significant positive effect of the intervention. Although no clear harm signal was seen, the DSMB also noted a trend toward a higher rate of the primary outcome (non-elective respiratory hospitalization or all-cause mortality), mortality, and SAEs in the intervention arm, further supporting its recommendation to proceed to early orderly close-out. The DSMB recommends that the last study visit occur within 3 months (by mid-March) and patients may complete their course of study agent until their next (and last) visit.

The NHLBI carefully reviewed the DSMB recommendations. On December 19, 2019, Dr. Lora Reineck notified you of the intent of the Institute to concur with the DSMB recommendation for early termination.

The NHLBI is hopeful that we can achieve our shared goal of maximizing the information and generalizable knowledge gained from the study.

Thank you for your leadership on this important study.

Sincerely,

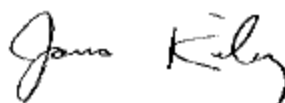A handwritten signature in black ink that reads "James Kiley". The signature is written in a cursive style with a large initial "J" and "K".

James P. Kiley, Ph.D.  
Director, Division of Lung Diseases  
National Heart, Lung, and Blood Institute, NIH

cc:

Dr. Frank Scirba  
Dr. Stephen Wisniewski  
Dr. Tony Punturieri  
Ms. Lisa Viviano  
Mr. Andre Walker  
Dr. Tom Croxton  
Dr. Lora Reineck  
Dr. Amy Patterson  
Dr. Nakela Cook

# Operations Memo CL023

TO: CleanUP IPF Clinical Site Principal Investigators and Lead Coordinators  
FROM: NEMO and CleanUP IPF PLG  
DATE: December 20, 2019  
RE: End of Study Operations; Trial Card

---

*CleanUP Operations Memos are posted on the PTC website under Documents – CleanUP Documents. Recipients are encouraged to download and file these memos for ready reference.*

---

The purpose of this memo is to inform you that the CleanUP-IPF Data Safety Monitoring Board met on December 18, 2019 to review the first planned efficacy analysis for the trial, and unanimously voted to terminate the study early for futility and to proceed with an orderly study close-out. This determination was based on the low likelihood of the study demonstrating a statistically significant positive effect of the intervention. Although no clear harm signal was seen, the DSMB also noted a trend toward a higher rate of the primary outcome (non-elective respiratory hospitalization or all-cause mortality), mortality, and SAEs in the intervention arm, further supporting its recommendation to proceed to early orderly close-out.

The study PIs recommend contacting the individual patients on antimicrobial therapy to discontinue study treatment as soon as possible. All study patients, including those on standard of care, should be contacted by January 31 for a safety check and requested to have a final study visit scheduled and completed by March 13, 2020. Any visits scheduled prior to January 31 can be scheduled as end of study visits. A letter for the participants with more details will be sent in early January 2020.

Trial Card vouchers will be deactivated January 31, 2020.

A copy of the DSMB recommendation is included on pages two and three of this memo. ***This memo is not a close out letter.*** Your official close out letter will come on completion of all study visits and data queries.

Please submit this memo and the DSMB letter to your local IRB in the next two weeks. Once you have submitted to your IRB, please e-mail the NEMO at [pulmonarytrials@edc.pitt.edu](mailto:pulmonarytrials@edc.pitt.edu) to let us know. You will also need to send a copy of your IRB's response letter to the same e-mail address

Please submit a Help Desk Ticket on the PTC website (<https://www.pulmonarytrials.org>) with any questions or concerns.
