# Supplementary material
Source: PubMed Central journal article supplement (PMC8114133)
Supplement: jama-e214956-s006.pdf [file jama-e214956-s006.pdf]

## Data Sharing Statement

### Data

**Data available:** Yes

**Data types:** Deidentified participant data, Data dictionary

**How to access data:** NIH Biolincc

(<https://biolincc.nhlbi.nih.gov/home/>)

**When available:** beginning date: 10-15-2023

### Supporting Documents

**Document types:** Statistical/analytic code

**How to access documents:** Included in the appendix

**When available:** beginning date: 10-15-2023

### Additional Information

**Who can access the data:** Anyone requesting the data per NHLBI policies

**Types of analyses:** For work that meets NHLBI policies

**Mechanisms of data availability:** Without investigator support necessary but investigator support encouraged to maximize scientific input and facilitate analyses
